## Author Index

- A**
- Abbate, R., v172 (SP459)  
 Abdalla, O., v229 (MP085), v352 (MP457)  
 Abdel-Kader, M.M., v51 (SP094)  
 Abdelgelil Hassan, A., v305 (MP313)  
 Abdelmaged Donia, A., v305 (MP313)  
 Abdelsalam, N.F., v51 (SP094)  
 Abderrahim, E., v285 (MP253)  
 Abdul Rahman, A., v43 (SP070)  
 Abendroth, D., v253 (MP160)  
 Abendroth, K., v85 (SP197)  
 Abensur, H., v276 (MP227)  
 Abitbol, C., v150 (SP391)  
 Abolghasemi, R., v307 (MP318)  
 'Abovic, M., v267 (MP199)  
 Abulezz, S., v223 (MP066)  
 Acar, B., v60 (SP124)  
 Acar, M., v67 (SP144), v155 (SP406)  
 Acarturk, E., v357 (MP471)  
 Acarturk, G., v155 (SP406)  
 Acharya, M., v89 (SP208)  
 Acikel, C., v168 (SP448), v171 (SP457),  
 v212 (MP029, MP030)  
 Adam, F.U., v138 (SP355)  
 Adam, U., v136 (SP348)  
 Adamczak, M., v36 (SP051), v55 (SP106)  
 Adamo, G., v109 (SP269)  
 Adamson, L., v199 (MO35)  
 Adana, S., v49 (SP090)  
 Adler, D., v115 (SP288)  
 Adler, G., v210 (MP022)  
 Adragao, T., v12 (SO27)  
 Ae Yoon, S., v53 (SP100), v113 (SP283),  
 v144 (SP374), v148 (SP386)  
 Afsar, B., v162 (SP429), v201 (MO41)  
 Agafonova, S.G., v362 (MP485)  
 Agargun, M.Y., v321 (MP364)  
 Agarwal, S.K., v323 (MP369)  
 Agnoli, A., v136 (SP347)  
 Agostini, B., v140 (SP359)  
 Agrafiotis, Th., v116 (SP291), v119 (SP299),  
 v289 (MP266), v290 (MP268)  
 Aguilera-Tejero, E., v25 (SP017)  
 Aguirre, A., v322 (MP366)  
 Aguirre, C., v86 (SP199)  
 Ahmad, A., v65 (SP139), v282 (MP245)  
 Ahmad, E.M., v223 (MP065)  
 Ahmadi, F., v81 (SP185), v307 (MP318)  
 Ahmadpoor, P., v167 (SP445)  
 Ahmadzad Asl, M., v170 (SP455)  
 Ahmed, A., v94 (SP223)  
 Ahn, C., v222 (MP061), v284 (MP248)  
 Ainollahi, B., v167 (SP446)  
 Aissa, B., v94 (SP223)  
 Akaydin, M., v277 (MP228)  
 Akbarian, M., v250 (MP149)  
 Akbas, H., v277 (MP228)  
 Akbayrak, N., v317 (MP351)  
 Akcanal, B., v250 (MP150)  
 Akcay, A., v149 (SP387), v177 (SP475),  
 v201 (MO41), v258 (MP174)  
 Akcicek, F., v349 (MP447)  
 Akcit, F., v59 (SP121)  
 Akdur, S., v315 (MP344)  
 Aker, S., v181 (SP487), v230 (MP089),  
 v303 (MP306)  
 Akgul, A., v149 (SP387), v258 (MP174),  
 v347 (MP441)  
 Akhtari Shojaie, E., v324 (MP373)  
 Akhter, A., v269 (MP207)  
 Akif Ozturk, M., v304 (MP308)  
 Akin, H., v49 (SP090), v219 (MP053)  
 Akizawa, T., v87 (SP202), v256 (MP169,  
 MP170), v326 (MP379)  
 Akman, B., v162 (SP429)  
 Akman, S., v249 (MP148), v346 (MP439)  
 Akoglu, E., v35 (SP047), v229 (MP085),  
 v352 (MP457)  
 Akpolat, T., v349 (MP447)  
 Aksu, N., v285 (MP252), v346 (MP439)  
 Aktas, A., v176 (SP473)  
 Aktas, S., v47 (SP082)  
 Aktas Yilmaz, B., v74 (SP165)  
 Al Ahdap, Y., v229 (MP085)  
 Al Khoury, S., v271 (MP210, MP211)  
 Al Mahri, A.S., v280 (MP239)  
 Al-Hilali, N.A., v265 (MP196)  
 Al-Humoud, H.A., v265 (MP196)  
 Al-Hussemi, F.M., v215 (MP038)  
 Al-Najjar, A., v161 (SP428)  
 Alafti, M., v49 (SP088)  
 Alarcon, M.C., v169 (SP451)  
 Albayrak, F., v281 (MP241)  
 Albayrak, R., v67 (SP144), v155 (SP406)  
 Albertazzi, A., v180 (SP484), v274 (MP220)  
 Alberu, J., v165 (SP440)  
 Aldemir, D., v131 (SP333)  
 Aleksandrowicz, E., v33 (SP043)  
 Alevyzaki, F., v290 (MP267), v315 (MP343)  
 Alexa, I., v125 (SP316)  
 Alexander, D., v107 (SP265)  
 Alexandrov, M.V., v316 (MP346)  
 Alexopoulos, E., v30 (SP033), v77 (SP174)  
 Alfonso, J.M., v262 (MP188)  
 Ali Memon, N., v340 (MP418)  
 Alia, P., v71 (SP155)  
 Alihan, G., v355 (MP466)  
 Aljama, P., v264 (MP193)  
 Allam, N.A., v341 (MP421, MP422)  
 Allegri, L., v30 (SP032)  
 Almaden, Y., v25 (SP017)  
 Almeida, A., v247 (MP141)  
 Almeida, J.R., v247 (MP142)  
 Almirall, J., v65 (SP138), v302 (MP303)  
 Aloisi, E., v90 (SP213), v122 (SP307),  
 v306 (MP317)  
 Aloisi, F., v374 (TO09)  
 Aloisi, M., v152 (SP398), v153 (SP402)  
 Alonso, S., v39 (SP060), v40 (SP061)  
 Alpa, M., v10 (SO22)  
 Alper, A.B., v58 (SP118)  
 Alperovich, G., v20 (SP003), v194 (MO22)  
 Alscher, D.M., v353 (MP458)  
 Altaca, G., v182 (SP491)  
 Altay, F., v351 (MP452)  
 Altieri, P., v50 (SP092), v107 (SP263)  
 Altincik, A., v226 (MP076)  
 Altintepe, L., v325 (MP374)  
 Altiparmak, M.R., v149 (SP389)  
 Altok Reis, K., v111 (SP275), v304 (MP308)  
 Altun, B., v8 (SO14), v26 (SP021),  
 v62 (SP129), v191 (MO12), v304 (MP310),  
 v305 (MP311)  
 Altunel, E., v304 (MP309), v358 (MP475)  
 Altunok, E., v138 (SP355)  
 Alvarez, L., v106 (SP260, SP261)  
 Alvarez, R., v143 (SP368)  
 Alvarez-Ude, F., v337 (MP409)  
 Alves, H., v166 (SP442)  
 Amabile, N., v18 (SO42), v299 (MP294)  
 Amann, K., v36 (SP051), v54 (SP104),  
 v214 (MP036)  
 Amann, K.U., v38 (SP055)  
 Amara, A.B., v211 (MP028)  
 Amara, F.E., v223 (MP065)  
 Amato, R., v371 (TO02)  
 Amatruda, O., v110 (SP274)  
 Ambrosi, A., v203 (MP002)  
 Ambrosini, A., v293 (MP275)  
 Ambühl, P., v3 (SO01)  
 Amenti, A., v245 (MP135)  
 Amiratti, A.L., v105 (SP258)  
 Amirkhalily, M., v299 (#), v311 (MP329)  
 Amitov, V., v95 (SP228)  
 Ammar, Y.A., v223 (MP065)  
 Amoedo, M., v121 (SP304)  
 Amoedo, M.L., v92 (SP217)  
 Amore, A., v4 (SO05), v29 (SP031),  
 v32 (SP040), v33 (SP041), v158 (SP417),  
 v210 (MP025)  
 Amoroso, A., v210 (MP025)  
 Amoroso, L., v43 (SP071)  
 Ana, V., v73 (SP163)  
 Anabi, A., v101 (SP246)  
 Anadolyski, K.A., v94 (SP225)  
 Anagnostopoulou, M., v177 (SP476)  
 Anarat, A., v346 (MP439)  
 Anas Rabbani, M., v231 (MP093)  
 Ancarani, E., v106 (SP262)  
 Anders, H.J., v196 (MO27)  
 Anderstam, B., v83 (SP192), v84 (SP193),  
 v353 (MP460)  
 Anderwald, C., v243 (MP129)  
 Andrade, L.C., v21 (SP005)  
 Andreassen, T., v365 (MP496)  
 Andreev, E.T., v224 (MP069), v286 (MP257)  
 Andreoli, D., v288 (MP262)  
 Andress, D., v89 (SP208)  
 Andreucci, M., v52 (SP099)

- Andreucci, V.E., v104 (#), v326 (MP379)  
 Andrikos, E., v152 (SP399), v156 (SP412)  
 Andrullii, S., v4 (SO05)  
 Angel Gentil, M., v6 (SO10)  
 Angel Oliver, J., v256 (MP167)  
 Angelet, P., v256 (MP167)  
 Angelini, D., v191 (MO13)  
 Angelucci, S., v117 (SP294)  
 Anglani, F., v155 (SP407), v245 (MP135)  
 Aniana, O., v73 (SP163)  
 Aniceto, J., v121 (SP304)  
 Annichiarico, C., v288 (MP262)  
 Ansell, D., v190 (MO10), v337 (MP411),  
 v366 (MP498, MP499)  
 Antidormi, T., v316 (MP345)  
 Antolin, A., v272 (MP213)  
 Anton, E., v65 (SP138)  
 Antonelli, M., v150 (SP392)  
 Antonicelli Verrelli, E., v88 (SP206)  
 Antonio Abascal, J., v143 (SP368)  
 Antonio Ardura, J., v27 (SP023),  
 v206 (MP010)  
 Antonio Conz, P., v334 (MP400)  
 António Lopes, J., v247 (MP141)  
 Antonopoulos, S., v51 (SP096)  
 Antonucci, F., v51 (SP095)  
 Antosiewicz, S., v348 (MP444)  
 Aoki, K., v264 (MP191)  
 Aoki, M., v112 (SP280)  
 Aoyama, C., v242 (MP126)  
 Aparicio, M., v154 (SP404), v164 (SP437)  
 Apaydin, S., v160 (SP422), v184 (SP495)  
 Apeland, T., v128 (SP326)  
 Apostolou, T., v177 (SP476)  
 Araar, B., v99 (SP240)  
 Arab, L., v103 (SP253)  
 Arabaci, F., v288 (MP261)  
 Araceli, A., v286 (MP255)  
 Aragao Aires, P., v166 (SP442)  
 Arambarri, M., v286 (MP255)  
 Aranda, E., v213 (MP032)  
 Arapidou, M., v238 (MP114)  
 Aras, M., v176 (SP473)  
 Arat, Z., v131 (SP333), v149 (SP387),  
 v162 (SP429), v258 (MP174),  
 v266 (MP198), v347 (MP441)  
 Araujo, M., v247 (MP142)  
 Arcaya, J.L., v125 (SP314)  
 Archelos, J., v211 (MP027)  
 Arda, B., v201 (MO39)  
 Ardic, N., v144 (SP371)  
 Arduini, A., v316 (MP345)  
 Arenas, D., v253 (MP161)  
 Arenas, M.D., v92 (SP217)  
 Aretz, A., v188 (MO05)  
 Argani, H., v324 (MP373)  
 Ariano, R.E., v319 (MP354)  
 Arias, M., v278 (MP230), v359 (MP477)  
 Arici, M., v8 (SO14), v26 (SP021),  
 v62 (SP129), v191 (MO12), v304 (MP310),  
 v305 (MP311)  
 Arikan, F., v313 (MP336)  
 Arikan, H., v35 (SP047), v229 (MP085),  
 v352 (MP457)  
 Arima, H., v347 (MP440)  
 Arinsoy, T., v111 (SP275), v304 (MP308),  
 v349 (MP447)  
 Arjona, C., v244 (MP132)  
 Árkossy, O., v138 (SP354)  
 Arkouche, W., v26 (SP019)  
 Armoogum, K., v280 (MP239)  
 Armstrong, S., v366 (MP498)  
 Aroldi, A., v359 (MP476)  
 Ars, E., v37 (SP053), v244 (MP132),  
 v245 (MP136)  
 Arteaga, J.M., v87 (SP204)  
 Arteni, A., v238 (MP115)  
 Arteni, R., v238 (MP115)  
 Artunc, F.H., v257 (MP171)  
 Arvanitis, D.K., v363 (MP488, MP489)  
 Asadi, A., v324 (MP372)  
 Asaka, M., v276 (MP226)  
 Asan, E., v217 (MP046)  
 Asano, S., v316 (MP347)  
 Asçi, G., v111 (SP276), v358 (MP475)  
 Ascı, G., v304 (MP309), v312 (MP334)  
 Ashayer, S., v17 (SO41)  
 Ashleigh, R., v72 (SP158)  
 Aslan, I., v171 (SP457)  
 Assunção, J., v286 (MP258)  
 Asztalos, L., v360 (MP481)  
 Atabak, S., v45 (#), v46 (#)  
 Ataei, N., v64 (SP136), v232 (MP095)  
 Atalay, H., v325 (MP374)  
 Atalay, S., v60 (SP124)  
 Ataman, R., v349 (MP447)  
 Ates, K., v349 (MP447)  
 Atilgan, K.G., v279 (MP234)  
 Atkins, R.C., v374 (TO11)  
 Atrissi, M., v17 (SO41)  
 Atzeni, A., v50 (SP092)  
 Aucella, F., v192 (MO16), v332 (MP397)  
 Augustin, S., v194 (MO20)  
 Auinger, M., v243 (MP129)  
 Auzanneau, C., v22 (SP008)  
 Avdelidou, A., v128 (SP325)  
 Averbukh, Z., v39 (SP059), v204 (MP006),  
 v294 (MP279)  
 Avila, A., v154 (SP404), v164 (SP437)  
 Avni Sahin, H., v288 (MP261)  
 Avorn, J., v243 (MP130)  
 Avvedimento, E.V., v52 (SP099)  
 Axelsson, J., v78 (SP177), v83 (SP192),  
 v84 (SP193), v99 (SP237), v130 (SP331),  
 v137 (SP351), v309 (MP324),  
 v312 (MP332)  
 Aydin, A., v18 (SO43), v168 (SP448)  
 Aydin, F., v249 (MP148)  
 Aydin, O., v49 (SP090)  
 Aydogdu, A., v226 (MP076)  
 Aygen, B., v345 (MP435)  
 Ayli, D., v279 (MP234)  
 Aytac, E., v160 (SP422)  
 Azevedo, F., v356 (MP469)  
 Azevedo-Silva, O., v24 (SP015)  
 Azhar, A., v282 (MP244)  
 Azuma, N., v129 (SP328)
- B**  
 Baba, S., v93 (SP222)  
 Babici, D., v61 (SP125)  
 Babu, K., v365 (#)  
 Babunova, N.B., v72 (SP159)  
 Baccarani, U., v358 (MP474)  
 Bacic, D., v187 (MO03)  
 Backs, W., v260 (MP181)  
 Baczynski, D., v348 (MP444)  
 Baddour, N.M., v341 (MP421, MP422)  
 Badiou, S., v249 (MP146)  
 Badovinac, K., v9 (SO18)  
 Bae, D., v348 (MP443)  
 Bae Kim, S., v274 (MP221)  
 Bagdasaryan, A.R., v173 (SP464)  
 Baghaipoor, M.R., v250 (MP149)  
 Bahl Lee, H., v201 (MO40), v207 (MP013,  
 MP014)  
 Bahlmann, E., v176 (SP472)  
 Bahlmann, F.H., v176 (SP472)  
 Bahner, U., v89 (SP209)  
 Baillat, V., v249 (MP146)  
 Bajardi, P., v140 (SP359)  
 Bajnok, L., v326 (MP378)  
 Bajo, M., v343 (MP427)  
 Bakkaloglu, A., v346 (MP439)  
 Bakkaloglu, S., v63 (SP132), v220 (MP057)  
 Bakkaloglu, S.A., v346 (MP439)  
 Bakker-de Bruin, Y., v258 (MP175)  
 Bakoush, O., v231 (MP092)  
 Bakr, A.M., v215 (MP038)  
 Bakr, M.A., v161 (SP425), v168 (SP447)  
 Bakran, A., v366 (MP498, MP499)  
 Balafa, O., v152 (SP399)  
 Balal, M., v357 (MP471)  
 Balaska, K., v177 (SP476)  
 Balasubramaniam, S., v49 (SP089)  
 Baldamus, C.A., v97 (SP232), v322 (MP365)  
 Baldovino, S., v10 (SO22)  
 Balducci, A., v105 (SP256)  
 Balducci, L., v203 (MP002)  
 Balenzano, C., v28 (SP027), v203 (MP003),  
 v317 (MP348)  
 Baleva, M.P., v286 (MP257)  
 Bali, M., v111 (SP275), v304 (MP308)  
 Baliga, K.V., v178 (SP479)  
 Balla, J., v109 (SP271), v325 (MP376),  
 v326 (MP378)  
 Ballal, S.H., v365 (#)  
 Ballarin, J., v245 (MP136)  
 Ballarin, J.A., v37 (SP053)  
 Baltachi, D.H., v250 (#)  
 Baltali, M., v297 (MP289), v300 (MP296)  
 Bammens, B., v66 (SP141), v335 (MP403),  
 v372 (TO03)  
 Bamonti, F., v272 (MP214)  
 Banfi, G., v31 (SP037)  
 Banikazemi, M., v10 (SO21)  
 Bansaghi, Z., v150 (SP390)  
 Bantis, C., v181 (SP487), v230 (MP089),  
 v303 (MP306)  
 Baptiste Richard, J., v339 (MP417)  
 Barange, K., v45 (SP076), v64 (SP137)  
 Bárány, P., v83 (SP192), v84 (SP193),  
 v99 (SP237)  
 Barany, P., v78 (SP177), v130 (SP331),  
 v137 (SP351), v309 (MP324),  
 v312 (MP332)  
 Barata, J.D., v197 (MO30)  
 Barbano, G., v245 (MP135)  
 Barbara De Sanctis, L., v50 (SP092)  
 Barbosa, D., v151 (SP394)  
 Barboutis, K., v110 (SP272), v111 (SP277)  
 Barbulescu, C., v267 (MP201)  
 Barbullushi, M., v56 (SP111)  
 Barceló, P., v37 (SP053)  
 Bardaji, A., v256 (MP167)  
 Bardi, E., v50 (SP093)  
 Bare, M., v65 (SP138)  
 Barlogie, B., v223 (MP066)  
 Barreto, C., v286 (MP258)  
 Barreto, D.V., v105 (SP258)  
 Barreto, F.C., v189 (MO08)  
 Barrientos, A., v39 (SP060), v40 (SP061)

- Barril, G., v253 (MP161), v262 (MP188), v332 (MP396), v339 (MP416)
- Barroso, E., v362 (MP486)
- Barsotti, G., v28 (SP028), v75 (SP167), v97 (SP231), v123 (SP310), v162 (SP431), v288 (MP262)
- Barsoum, R., v83 (SP190)
- Bartels, P.C.M., v123 (SP311), v124 (SP312)
- Barth, C., v97 (SP232), v322 (MP365), v326 (MP377)
- Bartolomé, J., v332 (MP396)
- Bartosik, H., v149 (SP388)
- Bartsch, P., v233 (MP098)
- Bascands, J.-L., v251 (MP153)
- Basçi, A., v111 (SP276), v201 (MO39), v358 (MP475)
- Basci, A., v114 (SP285), v147 (SP383), v259 (MP179), v269 (MP205), v312 (MP334)
- Basic-Jukic, N., v120 (SP301)
- Basile, C., v88 (SP206), v150 (SP392)
- Basile, V., v166 (SP443)
- Basiri, A., v167 (SP446)
- Baskin, E., v133 (SP338), v179 (SP481)
- Basolo, B., v366 (MP497)
- Bassas, L., v244 (MP132)
- Bastos, M.G., v276 (MP227)
- Bataille, P., v262 (MP186)
- Batini, V., v71 (SP157), v218 (MP049)
- Battaglia, M., v203 (MP002), v214 (MP037)
- Batum, S., v24 (SP013)
- Bauer, K., v42 (SP069)
- Bayata, S., v48 (SP087)
- Bayés, B., v364 (MP491)
- Beati, S., v218 (MP049)
- Beatovic, S.L., v364 (MP492)
- Beatriz, D., v177 (SP477, SP477)
- Beauwens, R., v3 (SO02), v251 (MP154)
- Bebb, C., v242 (MP128)
- Beccherelli, P., v359 (MP476)
- Becherelli, P., v172 (SP459)
- Beck, M., v10 (SO20), v248 (MP143)
- Beck Lee, K., v104 (SP255)
- Becker, P.A., v41 (SP065)
- Becker-Cohen, R., v190 (MO11)
- Bedino, G., v28 (SP027), v203 (MP003)
- Bednarek-Skublewska, A., v148 (SP385), v315 (MP342)
- Bednarova, V., v134 (SP344), v330 (MP390)
- Beerhout, C., v334 (MP401)
- Beetz, I., v78 (SP176)
- Beguín, C., v188 (MO06)
- Behalf CRRB, O., v244 (MP131)
- Behalf of the Lanthanum Study Group, o., v92 (SP219)
- Behalf of the SPD405-301 Study Group, o., v5 (SO07)
- Beji, S., v285 (MP253)
- Belasco, A., v151 (SP394)
- Belechri, A.-M., v77 (SP174), v83 (SP191)
- Bel'eed, K., v142 (SP364), v145 (#), v148 (SP384)
- Belge, H., v3 (SO02)
- Belgin Atac, F., v177 (SP475)
- Bellomo, G., v281 (MP240)
- Bellomo, R., v54 (SP103)
- Bellotti, N., v296 (MP286)
- Belock, S., v350 (MP449)
- Belozeroff, V., v103 (SP253)
- Beltran, S., v154 (SP404)
- Ben, T., v109 (SP271)
- Ben Abdallah, T., v285 (MP253)
- Ben Hamida, F., v285 (MP253)
- Ben Moussa, F., v285 (MP253)
- Ben Saïd, M., v339 (MP417)
- Ben Said, M.M., v212 (MP031)
- Bena, L., v44 (SP075)
- Benchetrit, S., v25 (SP016)
- Béné, B., v118 (SP297)
- Bene, B., v137 (SP350), v333 (MP399)
- Benedetto, F.A., v295 (MP284)
- Beneyto, I., v360 (MP479)
- Bennett, T., v331 (MP394)
- Benozzi, L., v30 (SP032)
- Bentley, M.D., v40 (SP062)
- Berardi, P., v281 (MP240)
- Berardinelli, L., v354 (MP462)
- Berber, I., v182 (SP491)
- Berberovic, Z., v199 (MO35)
- Berdeli, A., v32 (SP038, SP039), v33 (SP042), v180 (SP483), v192 (MO15), v226 (MP076)
- Berdych, M., v146 (SP380), v151 (SP393)
- Beresneva, O.N., v70 (SP153)
- Bergamini, S., v274 (MP220)
- Bergamo, D., v251 (MP152)
- Berger, I., v37 (SP054), v38 (SP055)
- Bergia, R., v140 (SP359)
- Bergler, T., v21 (SP006)
- Bergner, R., v6 (SO09)
- Bergstrom, B., v86 (SP198)
- Berkiten, R., v351 (MP452)
- Berland, Y., v63 (SP134)
- Berman, S., v39 (SP059), v204 (MP006), v294 (MP279)
- Bermond, F., v336 (MP407)
- Bernabini, G., v218 (MP049)
- Bernhardt, W.M., v54 (SP104)
- Bernheim, J., v25 (SP016)
- Berruguete, R., v196 (MO25)
- Berta, K., v336 (MP406)
- Berthou, F., v262 (MP187)
- Bertinetto, P., v285 (MP251)
- Berto, M.I., v140 (SP359)
- Bertoni, E., v172 (SP459), v359 (MP476), v368 (MP503)
- Besenyi, Z., v100 (SP241)
- Besler, M., v330 (MP389)
- Bettencourt, A., v151 (SP394)
- Bevc, S., v295 (MP283)
- Beyer, U., v261 (MP183), v269 (MP206)
- Bhamra-Ariza, P., v291 (MP269)
- Bhandari, S., v142 (SP364), v145 (#), v148 (SP384)
- Bhowmik, D., v323 (MP369)
- Bialkowska, J., v81 (SP186)
- Bianchi, C., v251 (MP152)
- Bianchi, G., v42 (SP068)
- Bianchi, S., v71 (SP157)
- Bianchini, G., v232 (MP096)
- Biber, J., v187 (MO03)
- Biblaki, D., v126 (SP317)
- Bichet, D., v10 (SO21)
- Bideci, A., v63 (SP132)
- Bieglmayer, C., v292 (MP272)
- Biesenbach, G., v172 (SP460)
- Bigazzi, D., v71 (SP157)
- Bijuklic, K., v219 (MP052)
- Bilezikci, B., v355 (MP465)
- Bilge, I., v351 (MP452)
- Bilgi, O., v47 (SP082)
- Bilgic, A., v131 (SP333, SP335), v149 (SP387), v258 (MP174), v266 (MP198), v347 (MP441)
- Bilgic, C., v160 (SP422)
- Bilucaglia, D., v285 (MP251)
- Binczak-Kuleta, A., v210 (MP022)
- Bindels, R.J.M., v98 (SP234), v199 (MO36)
- Biondi, M.L., v103 (SP251)
- Bircan, Z., v60 (SP122)
- Birne, R., v12 (SO27), v154 (SP405)
- Biro, A., v68 (SP148)
- Biro, S., v109 (SP271)
- Bittencourt, G.R., v144 (SP373)
- Bjelakovic, G., v22 (SP007)
- Bjelakovic, M., v22 (SP007)
- Blagic, M., v364 (MP492)
- Blair, A., v93 (SP221), v95 (SP226)
- Blanc, E., v291 (MP271)
- Blankestijn, P.J., v74 (SP164)
- Blasi, A., v214 (MP037), v218 (MP050)
- Bleich, M., v371 (TO01)
- Bleta, A., v290 (MP267)
- Bloom, R., v169 (SP452)
- Bloudickova, S., v72 (SP160)
- Blyth, K.G., v299 (MP293)
- Boaz, M., v68 (SP148)
- Bobkova, I.N., v27 (SP024)
- Bobrie, G., v61 (SP127)
- Bocian, K., v156 (SP411)
- Bock, A., v261 (MP184)
- Bocker, S., v354 (MP463)
- Boddaert, J., v18 (SO42), v299 (MP294)
- Bodor, C., v40 (SP064)
- Boedigheimer, M., v196 (MO26)
- Boehler, J., v193 (MO18)
- Boer, W., v122 (SP306)
- Boeschoten, E.W., v78 (SP176), v190 (MO09), v258 (MP175), v302 (MP304), v303 (MP305), v373 (TO07)
- Boffoli, D., v31 (SP036)
- Bohlender, J., v354 (MP463)
- Boito, R., v371 (TO02)
- Boitte, F., v83 (SP190)
- Bok Choi, K., v92 (SP216), v146 (SP378), v323 (MP368)
- Bolaños, N., v20 (SP003), v194 (MO22)
- Boleslaw, R., v233 (MP097)
- Boletis, I., v16 (SO38)
- Bolgan, I., v51 (SP095)
- Bommer, J., v262 (MP188)
- Bonanno, D., v187 (MO01), v302 (MP302)
- Bonati, A., v30 (SP032)
- Bone, J.M., v12 (SO25)
- Bone, M., v211 (MP028), v237 (MP110)
- Bonello, M., v51 (SP095), v156 (SP412), v333 (MP398), v372 (TO05)
- Bonet, J., v364 (MP491)
- Bonfante, L., v155 (SP407)
- Bong Lee, S., v211 (MP026)
- Bonifati, C., v202 (MO43)
- Bonne, J.-F., v101 (SP244)
- Bonofiglio, R., v141 (SP361), v205 (MP008)
- Bonomini, M., v43 (SP071), v117 (SP294), v316 (MP345)
- Boratynska, M., v156 (SP410), v179 (SP480)
- Borawski, J., v21 (SP004), v319 (MP355), v320 (MP357, MP358), v321 (MP361), v324 (MP371)
- Borbas, B., v360 (MP481)
- Bordoni, V., v156 (SP412), v334 (MP402)
- Borgatti, P., v103 (SP250)
- Borgdorff, P., v123 (SP311), v124 (SP312)
- Borlandelli, S., v329 (MP387)

- Borrellas, X., v194 (MO20)  
 Bos, W.J., v302 (MP304)  
 Bosch, R.J., v27 (SP023)  
 Boscutti, G., v11 (SO23), v358 (MP474)  
 Botella Lorenzo, A., v120 (SP302)  
 Bots, M.L., v74 (SP164)  
 Bouali, B., v118 (SP297)  
 Bouba, I., v31 (SP035)  
 Boucherot, A., v371 (TO01)  
 Boudnikova, N.E., v362 (MP485)  
 Boufidou, F., v290 (MP267)  
 Bouissou, F., v251 (MP153)  
 Boulahrouz, R., v230 (MP088), v287 (MP259)  
 Boulanger, C.M., v18 (SO42), v299 (MP294)  
 Boumendjel, N., v26 (SP019)  
 Bousquet, G.C., v146 (SP379)  
 Boyacioglu, S., v4 (SO06)  
 Bozfakioglu, S., v349 (MP447)  
 Bozkurt, D., v304 (MP309)  
 Bozlar, U., v18 (SO43), v171 (SP457)  
 Bozoklar, A., v182 (SP489)  
 Brady, H.R., v371 (TO01)  
 Brajovic, M., v300 (MP298)  
 Brancaccio, D., v103 (SP251)  
 Brandenburg, V., v16 (SO37)  
 Brandenburg, V.M., v13 (SO29), v105 (SP257)  
 Braun, C., v159 (SP421)  
 Braun, J., v89 (SP209, SP210)  
 Bravo, J., v6 (SO10)  
 Breen, C., v266 (MP197)  
 Bregman, R., v276 (MP227)  
 Brendolan, A., v334 (MP402), v372 (TO05)  
 Brenner, B., v10 (SO21)  
 Bresadola, F., v358 (MP474)  
 Brescia, F., v106 (SP262)  
 Breuer, S., v115 (SP288)  
 Breulmann, B., v181 (SP487)  
 Breunig, F.B., v246 (MP139)  
 Breyer, M.D., v235 (MP106)  
 Brezzi, B., v354 (MP462), v359 (MP476)  
 Briançon, S., v338 (MP412)  
 Brillet, G., v262 (MP186)  
 Brink, H.S., v197 (MO30)  
 Brodkiewicz, A., v210 (MP022)  
 Broumand, B., v45 (#), v46 (#), v284 (MP250)  
 Brown, F.G., v374 (TO11)  
 Brumar, O., v36 (SP049)  
 Brummer, U., v316 (MP345)  
 Brunet, P., v63 (SP134)  
 Brunkhorst, R., v115 (SP288)  
 Brunner, B., v371 (TO01)  
 Bruno, A., v88 (SP206)  
 Brusasco, S., v116 (SP290)  
 Bruschi, E., v28 (SP027), v210 (MP023)  
 Bryl, E., v33 (SP043), v352 (MP455)  
 Brzosko, S., v21 (SP004)  
 Buccianti, G., v259 (MP177)  
 Bücher, E., v8 (SO15)  
 Buchler, M., v161 (SP428)  
 Bucsa, C., v77 (SP175)  
 Bucse, C., v286 (MP256)  
 Budde, K., v175 (SP470)  
 Buemi, M., v90 (SP213), v306 (MP317)  
 Buhaescu, I., v172 (SP461), v223 (MP067)  
 Bullo, B., v101 (SP245), v233 (MP097)  
 Bultas, J., v10 (SO21)  
 Bumbea, H., v314 (MP340)  
 Bumbea, V., v166 (SP441)  
 Bungay, P., v102 (SP247), v189 (MO07)  
 Bunio, A., v131 (SP334), v132 (SP336)  
 Buoncristiani, E., v300 (MP297),  
 v332 (MP396)  
 Buoncristiani, U., v174 (SP465),  
 v332 (MP396)  
 Buraczynska, M., v235 (MP103)  
 Burden, R., v242 (MP128)  
 Burdese, M., v251 (MP152)  
 Burg, M., v253 (MP160)  
 Burger, M., v150 (SP390)  
 Burgos, F.J., v169 (SP451), v367 (MP502)  
 Burhan, B., v219 (MP054)  
 Burke, S., v93 (SP221), v95 (SP226)  
 Burmeister, J.E., v122 (SP308)  
 Burnier, M., v291 (MP271)  
 Busch, M., v75 (SP168)  
 Butti, A., v103 (SP251)  
 Buturovic Ponikvar, J., v267 (MP199)  
 Buyan, N., v63 (SP132), v220 (MP057)  
 Buyukasik, Y., v191 (MO12)  
 Buzatu, E., v286 (MP256)  
 Buzio, C., v30 (SP032)
- C**
- Cadete, M.M., v320 (MP360)  
 Caglar, K., v18 (SO43), v168 (SP448),  
 v171 (SP457), v212 (MP029, MP030),  
 v317 (MP351)  
 Çağlar, M., v217 (MP046)  
 Caglar, S., v8 (SO14), v62 (SP129)  
 Çağlayan, C., v60 (SP122)  
 Cakalagaoglu, F., v35 (SP047)  
 Cakir, E., v18 (SO43), v171 (SP457)  
 Calabresi, L., v31 (SP036), v246 (MP137)  
 Calabrò, R., v187 (MO01), v302 (MP302),  
 v307 (MP319)  
 Caliskan, S., v346 (MP439)  
 Calvo, C., v347 (MP442)  
 Calvo, N., v308 (MP323), v348 (MP445)  
 Camacho-Miramontes, R., v349 (MP448)  
 Cambareri, F., v306 (MP315)  
 Cambi, V., v331 (MP391)  
 Campean, V., v54 (SP104)  
 Campese, V.M., v71 (SP157)  
 Campise, R.M., v354 (MP462)  
 Campistol, J.M., v37 (SP053), v165 (SP439)  
 Campo, C., v57 (SP112, SP113)  
 Campos, B.M., v122 (SP308)  
 Camps, J., v194 (MO20)  
 Camsari, T., v208 (MP018), v273 (MP217),  
 v349 (MP447)  
 Camussi, G., v210 (MP023)  
 Canadillas, S., v25 (SP017)  
 Canalejo, A., v25 (SP017)  
 Canaud, B., v112 (SP279), v136 (SP349),  
 v298 (MP291), v335 (MP404)  
 Canaud, J.-P., v112 (SP279)  
 Canavese, C., v356 (MP467)  
 Canbakan, B., v45 (SP078)  
 Canessa, R.S., v41 (SP065)  
 Canivet, E., v262 (MP186)  
 Cantaluppi, V., v336 (MP407)  
 Canziani, M.E., v85 (SP195)  
 Canziani, M.E.F., v105 (SP258),  
 v189 (MO08), v276 (MP227)  
 Capasso, G., v42 (SP068)  
 Capitanio, N., v31 (SP036)  
 Capobianco, C., v147 (SP381), v158 (SP416),  
 v218 (MP050), v359 (MP478)  
 Capone, D., v166 (SP443)  
 Capotorto, M., v139 (SP358)  
 Cappelli, G., v180 (SP484)  
 Cappelli, P., v316 (MP345)  
 Cappelli, V., v374 (TO09)  
 Capuano, P., v187 (MO03)  
 Capusa, C., v272 (MP215)  
 Cara, M., v245 (MP135)  
 Caramello, E., v140 (SP359)  
 Cardarelli, F., v103 (SP250)  
 Caridi, G., v192 (MO16)  
 Carlos Herrero, J., v73 (SP163)  
 Carlos Ruiz, J., v359 (MP477)  
 Carluccio, F., v133 (SP339)  
 Carmen, D., v177 (SP477)  
 Carmen Cruz, M., v347 (MP442)  
 Carmo, W.B., v276 (MP227)  
 Carnevali, M.L., v30 (SP032)  
 Carolino, E.T., v320 (MP360)  
 Caron, N., v46 (SP079)  
 Carraro, M., v210 (MP025), v356 (MP467)  
 Carrasco, C., v39 (SP060), v40 (SP061)  
 Carreño, V., v253 (MP161), v332 (MP396)  
 Carrera, M., v20 (SP003), v356 (MP469),  
 v357 (MP470)  
 Carreras, L., v71 (SP155)  
 Carrilho, P., v286 (MP258)  
 Carrizo, E., v125 (SP314)  
 Carter, M., v113 (SP281)  
 Caruntu, I., v223 (MP067)  
 Caruso, A., v289 (MP265)  
 Caruso, F., v141 (SP361)  
 Carvalho, A.B., v85 (SP195), v105 (SP258),  
 v189 (MO08)  
 Carvalho, E., v247 (MP140)  
 Casado, S., v39 (SP060), v40 (SP061)  
 Casani, A., v259 (MP177)  
 Casanova, S., v288 (MP263)  
 Cases, A., v17 (SO40), v79 (SP179)  
 Casino, F.G., v116 (SP290)  
 Caskey, F.J., v190 (MO10)  
 Caslake, M.J., v225 (MP073)  
 Cassiman, J.-J., v197 (MO28)  
 Castela, A.M., v17 (SO40), v79 (SP179),  
 v357 (MP470)  
 Castellani, G.L., v210 (MP023),  
 v317 (MP348)  
 Castellano, G., v158 (SP416), v198 (MO32),  
 v218 (MP050)  
 Castellino, P., v289 (MP265)  
 Castillo, I., v253 (MP161)  
 Casto, G., v75 (SP167)  
 Casucci, F., v88 (SP206), v150 (SP392)  
 Catalano, F., v306 (MP315)  
 Cavalcanti, E., v214 (MP037)  
 Cavallo, R., v10 (SO22)  
 Cavanal, M.F., v39 (SP058)  
 Cavdar, C., v273 (MP217)  
 Cavdar, Z., v273 (MP217)  
 Cazzato, F., v88 (SP206)  
 Cebollada, J., v143 (SP368)  
 Ceken, K., v311 (MP330), v312 (MP333),  
 v356 (MP468)  
 Celik, A., v208 (MP018)  
 Celik, H., v201 (MO41)  
 Celiker, H., v345 (MP435)  
 Cengel, A., v111 (SP275)  
 Cengiz, N., v133 (SP338), v179 (SP481)  
 Ceol, M., v155 (SP407)  
 Çerçi Tuncel, T., v285 (MP252)  
 Cerda, J., v191 (MO14)  
 Cerini, C., v63 (SP134)  
 Cermik, H., v47 (SP082)  
 Cernelc, P., v267 (MP199)

- Cerri, S., v180 (SP484)  
 Cerullo, G., v246 (MP137)  
 Cervenák, L., v40 (SP064)  
 Cesare, S., v18 (SO44), v147 (SP383),  
 v259 (MP179), v269 (MP205)  
 Cetinkaya, R., v281 (MP241)  
 Chadimová, , v220 (MP056)  
 Chae, D.-W., v222 (MP061)  
 Chahine, H.C., v125 (SP315)  
 Chakalaroski, K.P., v313 (MP337)  
 Chala, A., v115 (SP287)  
 Chalabi, L., v298 (MP291)  
 Chalmers, N., v72 (SP158)  
 Chambard, A., v5 (SO08)  
 Chamorro, A., v206 (MP012)  
 Chamoun, G., v129 (SP329)  
 Chan, J.S.D., v23 (SP011, SP012)  
 Chan Jin, D., v148 (SP386)  
 Chandar, J., v150 (SP391)  
 Chang, C.-F., v141 (SP362)  
 Chang, J.-M., v315 (MP341)  
 Chaparowska, D.M., v313 (MP337)  
 Charasse, C., v230 (MP088), v287 (MP259)  
 Charlesworth, J., v254 (MP164)  
 Charra, B., v337 (MP410)  
 Chatelet-Pouliquen, V., v161 (SP428)  
 Chatzipanagiotou, S., v290 (MP267),  
 v315 (MP343)  
 Chazot, C., v337 (MP410)  
 Cheddid, A., v61 (SP127)  
 Chef, G., v104 (#)  
 Chen, C.-A., v209 (MP021)  
 Chen, C.-C., v246 (MP138), v345 (MP434)  
 Chen, C.-H., v157 (SP413)  
 Chen, C.-M., v294 (MP281)  
 Chen, C.-P., v133 (SP340)  
 Chen, H.-C., v67 (SP143), v209 (MP021),  
 v315 (MP341)  
 Chen, H.-W., v58 (SP115)  
 Chen, J.-S., v215 (MP039)  
 Chen, L.-P., v133 (SP340)  
 Chen, S.-C., v283 (MP247)  
 Chen, X., v194 (MO21)  
 Cheng, C.-h., v157 (SP413)  
 Cheng, C.-J., v244 (MP133), v246 (MP138),  
 v345 (MP434)  
 Cheng, M.-F., v320 (MP359)  
 Cheol Song, H., v113 (SP283), v148 (SP386)  
 Cheon Park, H., v240 (MP120)  
 Chesterton, L.J., v331 (MP394)  
 Cheung, C.M., v72 (SP158), v193 (MO19)  
 Chiang, C.-K., v106 (SP259), v133 (SP340),  
 v268 (MP203)  
 Chiaromonte, S., v156 (SP412)  
 Chiarelli, G., v103 (SP251)  
 Chiba, T., v108 (SP267)  
 Chien, C.-T., v268 (MP203)  
 Chiesa, M., v4 (SO05), v29 (SP031),  
 v32 (SP040), v33 (SP041), v210 (MP025)  
 Chimienti, D., v88 (SP206)  
 Chimienti, S., v36 (SP050), v142 (SP366)  
 Chlebinska, I., v320 (MP358)  
 Chlubek, D., v182 (SP490)  
 Chmel, R., v180 (SP485)  
 Chmiel, G., v303 (MP307), v305 (MP312)  
 Chmielewski, M., v33 (SP043), v352 (MP455)  
 Chmura, A., v156 (SP411)  
 Choi, S., v153 (SP401)  
 Choluj, B., v68 (SP147)  
 Chou, Y.-H., v141 (SP362)  
 Choukroun, G., v167 (SP444), v262 (MP187),  
 v271 (MP212)  
 Chouliaras, G.L., v127 (SP322)  
 Chouliaras, I.C., v127 (SP322)  
 Chris, J., v376 (TO14)  
 Christensen, P.K., v14 (SO33)  
 Christofides, T., v55 (SP107), v56 (SP110)  
 Chroust, K., v263 (MP189)  
 Chu, P., v244 (MP133), v246 (MP138),  
 v345 (MP434)  
 Chuan Kuo, M., v210 (MP024)  
 Chudek, J., v8 (SO16), v55 (SP106),  
 v170 (SP453), v175 (SP468), v193 (MO17),  
 v344 (MP431)  
 Chudyk, A., v73 (SP162), v180 (SP482)  
 Chul Choi, K., v35 (SP048)  
 Chul Jung, Y., v236 (MP109), v284 (MP248)  
 Chun Chen, H., v210 (MP024)  
 Chung, K.-Y., v12 (SO26), v98 (SP235),  
 SP236, v173 (SP463)  
 Chung, M.-Y., v141 (SP362)  
 Chung, N., v311 (MP331)  
 Chydzewski, L., v21 (SP004), v320 (MP358)  
 Cian Franco, D., v374 (TO09)  
 Ciarimboli, G., v23 (SP010)  
 Cice, G., v187 (MO01), v302 (MP302),  
 v307 (MP319)  
 Ciechanowicz, A., v210 (MP022)  
 Ciechanowski, K., v73 (SP162), v168 (SP449),  
 v182 (SP490)  
 Cierpka, L., v170 (SP453)  
 Ciftci, S., v61 (SP128)  
 Cigarran, S., v308 (MP323), v348 (MP445)  
 Cinaz, P., v63 (SP132)  
 Cioffi, M., v307 (MP319)  
 Cirillo, P., v31 (SP036)  
 Cirina, P., v4 (SO05), v32 (SP040),  
 v33 (SP041), v158 (SP417)  
 Cirit, M., v48 (SP087)  
 Cisternino, C., v246 (MP137)  
 Ciszak, L., v159 (SP420)  
 Citlak, L., v35 (SP047)  
 Citron, L., v245 (MP135)  
 Claes, K., v13 (SO30), v335 (MP403),  
 v372 (TO03)  
 Claus, M., v122 (SP306)  
 Claverie, F., v234 (MP102)  
 Cleaud, C., v137 (SP350)  
 Cleries, M., v173 (SP462), v295 (MP282),  
 v302 (MP303), v308 (MP320)  
 Cline, K., v93 (SP221)  
 Coban, E., v59 (SP121)  
 Cobo, M., v237 (MP112)  
 Coche, E., v188 (MO06)  
 Cocola, S., v88 (SP206)  
 Coen, G., v105 (SP256)  
 Cofan, F., v173 (SP462)  
 Cohen, C.D., v371 (TO01)  
 Cohen, N., v117 (SP293)  
 Cointault, O., v45 (SP076), v64 (SP137),  
 v164 (SP435, SP436), v358 (MP473)  
 Cokkinou, V.D., v127 (SP322)  
 Colak, O., v134 (SP343)  
 Colak, T., v176 (SP473), v179 (SP481)  
 Colakoglu, N., v223 (MP066)  
 Colardyn, F., v280 (MP237)  
 Colarieti, G., v129 (SP329)  
 Cole, E., v3 (SO01)  
 Colic, M.J., v216 (MP043)  
 Colla, L., v251 (MP152), v285 (MP251)  
 Collins, A.J., v7 (SO13), v99 (SP239),  
 v283 (MP247)  
 Colussi, G., v110 (SP274), v293 (MP275)  
 Comina, D., v31 (SP037)  
 Compote, T., v256 (MP167)  
 Consani, C., v28 (SP028), v75 (SP167),  
 v162 (SP431), v191 (MO13)  
 Consiglio, V., v251 (MP152)  
 Constantinou Deltas, C., v55 (SP107),  
 v56 (SP110)  
 Conte, F., v327 (MP382)  
 Conti, G., v4 (SO05), v29 (SP031),  
 v32 (SP040), v33 (SP041), v158 (SP417),  
 v210 (MP025)  
 Cooke, B., v255 (MP166)  
 Cooley, R., v66 (SP142)  
 Coordinadores, A.P., v65 (SP138)  
 Copland, M., v329 (MP386)  
 Coppo, R., v4 (SO05), v29 (SP031),  
 v32 (SP040), v33 (SP041), v158 (SP417),  
 v210 (MP025)  
 Coppolino, G., v122 (SP307), v306 (MP317)  
 Corapcioglu Ozdemir, A., v139 (SP356),  
 v324 (MP370)  
 Corciulo, R., v198 (MO32)  
 Cordido, F., v135 (SP346)  
 Cornacchia, F., v197 (MO29), v208 (MP016),  
 v296 (MP286)  
 Coronei, F., v308 (MP323), v348 (MP445)  
 Correia da Cunha, J., v247 (MP141)  
 Cortellezzi, A., v31 (SP037)  
 Cortés-Sanabria, L., v202 (MO42),  
 v349 (MP448), v350 (MP450, MP451)  
 Cortesini, R., v365 (MP494)  
 Cortiana, M., v31 (SP037)  
 Coskun, M., v254 (MP162)  
 Cosmai, L., v341 (MP423)  
 Costa, M.G., v122 (SP308)  
 Costanzo, P., v10 (SO22)  
 Coupland, C., v242 (MP128)  
 Courtoy, P.J., v22 (SP008), v197 (MO28)  
 Covic, A., v36 (SP049), v125 (SP316),  
 v172 (SP461), v223 (MP067),  
 v238 (MP115), v291 (MP269)  
 Covic, M., v223 (MP067)  
 Cowie, A., v193 (MO19)  
 Coyne, D., v89 (SP208)  
 Cozzi, G., v257 (MP173), v372 (TO06)  
 Cozzolino, M., v103 (SP251)  
 Craig, J.C., v137 (SP352), v202 (MO43)  
 Craig, M.C., v202 (MO43)  
 Crasci, E., v122 (SP307), v306 (MP317)  
 Cravedi, P., v30 (SP032)  
 Cravero, R., v140 (SP359)  
 Cremaschi, L., v122 (SP306)  
 Crepaldi, C., v372 (TO05)  
 Crespo, J., v359 (MP477)  
 Crespo, J.F., v164 (SP437)  
 Cresser, D., v354 (MP462)  
 Crimmins, C.R. v40 (SP062)  
 Crisafulli, A., v90 (SP213)  
 Crisetti, A., v139 (SP358)  
 Cristina Caroleo, M., v205 (MP008)  
 Cristofano, C., v36 (SP050), v142 (SP366)  
 Cristol, J.-P., v136 (SP349), v249 (MP146),  
 v298 (MP291)  
 Crnjakovic Palmovic, J., v289 (MP264)  
 Crowe, A., v50 (SP091)  
 Cruz, J., v263 (MP190)  
 Cruz Pastor, M., v364 (MP491)  
 Cruzado, J.M., v20 (SP003), v157 (SP415),  
 v194 (MO22)  
 Csernay, L., v100 (SP241)

- Csiky, B., v138 (SP354), v306 (MP316)  
 Csipo, I., v325 (MP376)  
 Cubero, J., v6 (SO10)  
 Cueto-Manzano, A.M., v202 (MO42),  
 v349 (MP448), v350 (MP450, MP451)  
 Cuevas, X., v296 (MP285)  
 Cukuranovic, R., v22 (SP007)  
 Cumali, R., v149 (SP389)  
 Cunningham, J., v89 (SP210)  
 Cupisti, A., v97 (SP231), v123 (SP310)  
 Cura, A., v32 (SP038, SP039), v33 (SP042),  
 v180 (SP483), v192 (MO15)  
 Cusi, D., v371 (TO02)  
 Cutrupi, S., v75 (SP169), v306 (MP314)  
 Cvijetic, S., v85 (SP196)  
 Czekalski, S., v71 (SP156), v216 (MP044),  
 v344 (MP430)  
 Czerwińska, B., v55 (SP106), v344 (MP431)  
 Czock, D., v228 (MP082)  
 Czop, D., v315 (MP342)  
 Czupryniak, A., v138 (SP353)  
 Czychowska, K., v352 (MP456)
- D**
- D, A., v282 (MP244)  
 Dadfar, E., v215 (MP041)  
 Dal Canton, A., v28 (SP027), v109 (SP269),  
 v197 (MO29), v203 (MP003),  
 v208 (MP016), v210 (MP023),  
 v296 (MP286), v317 (MP348),  
 v341 (MP423), v351 (MP453)  
 Dalboni, M.A., v105 (SP258)  
 Daly, C., v336 (MP408), v338 (MP414)  
 Damas, P., v6 (SO11), v44 (SP074)  
 d'Amato, R., v187 (MO01), v302 (MP302)  
 Dambrosio, M., v203 (MP002)  
 Damjanovic, T., v297 (MP287)  
 Damnjanovic, T., v300 (MP298)  
 Dan, A., v360 (MP481)  
 D'Andrea, A., v187 (MO01), v302 (MP302),  
 v307 (MP319)  
 Danese, M., v143 (SP370), v325 (MP375)  
 D'Angelo, A., v155 (SP407), v245 (MP135)  
 Daniel, C., v207 (MP015), v236 (MP108)  
 Daniel, V., v160 (SP424)  
 Danieli, R., v298 (MP290)  
 Danielsen, H., v262 (MP188)  
 Danzig, V., v145 (SP375)  
 D'Aprile, A., v31 (SP036)  
 Dargie, H.J., v299 (MP293)  
 D'Armiento, M., v234 (MP100)  
 Darwish, K.Z., v308 (MP321)  
 Dash, S.C., v323 (MP369)  
 Dattolo, P., v174 (SP465)  
 David, A., v65 (SP139), v282 (MP245)  
 David, S., v259 (MP177), v331 (MP391)  
 Davidov, K.T., v286 (MP257)  
 Davies, D.R., v3 (SO03)  
 Davies, S., v337 (MP411)  
 Davis, J., v204 (MP004)  
 Dazzi, F., v152 (SP398), v153 (SP402)  
 de Almeida, E., v247 (MP141)  
 De Alvaro, F., v17 (SO40), v79 (SP179)  
 De Amicis, S., v210 (MP023), v317 (MP348)  
 De Angelis, S., v136 (SP347)  
 De Blasio, A., v104 (#)  
 De Broe, M., v376 (TO14)  
 De Cal, M., v334 (MP402)  
 de Cal, M., v156 (SP412)  
 de Charro, F.Th., v67 (SP145)  
 De Chasteigner, A., v262 (MP186, MP187),  
 v271 (MP212)  
 De Cristofaro, V., v334 (MP400)  
 De Francisco, A., v197 (MO30)  
 De Francisco, A.L.M., v270 (MP209),  
 v278 (MP230), v359 (MP477)  
 de Groot, K., v176 (SP472)  
 de Jersey, P., v254 (MP164)  
 De Jonge, H.R., v197 (MO28)  
 De Lucia, D., v153 (SP400)  
 de Lusignan, S., v287 (MP260)  
 De Maglio, G., v11 (SO23)  
 De Mauri, A., v208 (MP016), v296 (MP286)  
 De Pietro, S., v152 (SP398), v153 (SP402)  
 De Sanctis, L.B., v288 (MP263)  
 De Smet, R., v114 (SP284), v218 (MP048),  
 v280 (MP237), v294 (MP278),  
 v314 (MP339), v334 (MP401),  
 v339 (MP415)  
 De Vecchi, A.F., v272 (MP214)  
 Debbi, A., v180 (SP484)  
 Deborska-Materkowska, D., v183 (SP492)  
 Dechmann, T., v327 (MP381)  
 Declèves, A.-E., v46 (SP079)  
 Decramer, S., v251 (MP153)  
 Dede, F., v279 (MP234)  
 Deechongkit, S., v264 (MP191)  
 Defazio, V., v192 (MO16), v246 (MP137)  
 Deferrari, G., v204 (MP005)  
 Degenne, M., v161 (SP428)  
 Degirmenci, B., v155 (SP406)  
 Degrell, P., v235 (MP104)  
 Dehde, S., v15 (SO36)  
 Dehout, F., v10 (SO20), v248 (MP143)  
 Deicher, R., v292 (MP272)  
 Deighan, C.J., v225 (MP073)  
 Dejanov, P., v154 (SP403)  
 Dekker, F.W., v78 (SP176), v190 (MO09),  
 v302 (MP304), v303 (MP305), v373 (TO07)  
 Del Boccio, P., v117 (SP294)  
 Del Buono, F., v117 (SP294)  
 del Carmen Rial, M., v165 (SP440)  
 del Castillo, N., v239 (MP117)  
 Del Papa, N., v31 (SP037)  
 Del Pino, M.D., v260 (MP181)  
 Del Pozo, C., v106 (SP260, SP261)  
 Del Prete, D., v155 (SP407)  
 Del Valle, E., v86 (SP199)  
 Delcourt, C., v136 (SP349), v298 (MP291)  
 Deligiannis, A.P., v314 (MP338)  
 Della Casa, L., v274 (MP220)  
 Dellavia, C., v155 (SP409)  
 Delles, C., v69 (SP149), v195 (MO23),  
 v245 (MP134)  
 Delles, C.C., v242 (MP127)  
 Delumeau, J., v335 (MP404)  
 Demers, C., v26 (SP020)  
 DeMin, A., v139 (SP358)  
 Demir, E., v357 (MP471)  
 Demir, F., v70 (SP154)  
 Demir, M., v49 (SP090), v110 (SP273),  
 v130 (SP330), v219 (MP053)  
 Demir, S., v67 (SP144), v313 (MP336)  
 Demiralp, E., v352 (MP457)  
 Demirbas, A., v15 (SO34), v277 (MP228),  
 v355 (MP466), v356 (MP468)  
 Demircan, S., v300 (MP296)  
 Demirel, O.U., v131 (SP335)  
 Demirhan, B., v355 (MP465)  
 Demova, H., v34 (SP044)  
 den Elzen, W.P., v303 (MP305)  
 Deniz Kara, O., v285 (MP252)  
 Denizmen, Y., v346 (MP439)  
 Dequidt, C., v342 (MP426)  
 Deray, G., v271 (MP212), v280 (MP238)  
 Derici, U., v8 (SO14), v62 (SP129),  
 v111 (SP275), v304 (MP308)  
 Dervin, L., v91 (SP215)  
 Dervisoglu, E., v139 (SP356), v324 (MP370)  
 Desnick, R., v10 (SO21)  
 Dessi, M., v136 (SP347)  
 Devans, G.M., v68 (SP146)  
 Deveci, S., v130 (SP330)  
 Devriendt, J., v6 (SO11), v44 (SP074)  
 Devuyt, O., v3 (SO02), v22 (SP008),  
 v188 (MO06), v197 (MO28), v245 (MP136)  
 Dhaene, M., v251 (MP154)  
 D'Haese, P., v376 (TO14)  
 Dhondt, A., v122 (SP306), v314 (MP339)  
 Di Benedetto, A., v18 (SO44), v147 (SP383),  
 v187 (MO01), v259 (MP179),  
 v269 (MP205), v302 (MP302),  
 v307 (MP319)  
 Di Cesare, M., v117 (SP294)  
 Di Felice, A., v180 (SP484)  
 Di Gregorio, P., v316 (MP345)  
 Di Lallo, D., v121 (SP303)  
 Di Landro, D., v245 (MP135)  
 Di Liberato, L., v316 (MP345)  
 Di Maria, L., v368 (MP503)  
 Di Martino, M., v374 (TO09)  
 Di Mauro, L., v217 (MP047)  
 Di Napoli, A., v121 (SP303)  
 Di Palma, A.M., v216 (MP042)  
 Di Paolo, S., v4 (SO04), v155 (SP408),  
 v165 (SP438), v217 (MP047),  
 v359 (MP478)  
 Di Piazza, D., v205 (MP008)  
 Di Pietro, N., v43 (SP071)  
 Di Toma, L., v110 (SP274), v293 (MP275)  
 Diab, E.H., v51 (SP094)  
 Dias, T.S., v144 (SP373)  
 Dickson, J., v12 (SO27)  
 Diczfalusy, U., v130 (SP331)  
 Diekmann, F., v97 (SP233)  
 Dietrich, H., v160 (SP424)  
 Dietsch, P., v22 (SP009), v42 (SP069)  
 Digalaki, K., v119 (SP299), v289 (MP266),  
 v290 (MP268)  
 Dignat-George, F., v63 (SP134)  
 Dilip, ., v365 (#)  
 Dillon, M., v93 (SP221)  
 Dimitriades, A., v349 (MP447)  
 Dimitriadis, C., v77 (SP174), v83 (SP191)  
 Dimitriadis, G.D., v127 (SP322)  
 Dimkovic, N., v5 (SO08), v297 (MP287),  
 v300 (MP298)  
 Dimkovic, N.Y., v321 (MP363)  
 Dimkovic, S., v300 (MP298)  
 Dimova, B., v183 (SP493), v184 (SP496)  
 Dimulescu, T., v77 (SP175)  
 Dincer, I., v74 (SP165), v291 (MP270)  
 Dinckan, A., v15 (SO34), v355 (MP466)  
 Ding, F., v376 (TO16)  
 Ding, R., v194 (MO21)  
 Dionisio, P., v140 (SP359)  
 D'Isa, S., v187 (MO01), v302 (MP302),  
 v307 (MP319)  
 Disney, A., v254 (MP164)  
 Dissegna, D., v156 (SP412)  
 Divino-Filho, J.C., v83 (SP192)  
 Djerassi, R.J., v224 (MP069), v286 (MP257)

- Djordjevic, T., v297 (MP287), v300 (MP298)  
Djorovic, S., v297 (MP287)  
Djurdjev, O., v140 (SP360), v329 (MP386)  
Djuric, Z.B., v321 (MP363)  
Dlin, V., v69 (SP150)  
Do, J., v348 (MP443)  
Dobronravov, V.A., v70 (SP153)  
Docherty, N.G., v205 (MP007)  
Dodic, N., v300 (MP298)  
Dogan, E., v317 (MP349), v321 (MP364)  
Dogan, M., v61 (SP126)  
Dogukan, A., v345 (MP435)  
Doi, T., v353 (MP459)  
Dolar-Szczasny, J., v315 (MP342)  
Dolegowska, B., v182 (SP490)  
Dolores Albero, M., v106 (SP260, SP261)  
Dolores Arenas, M., v86 (SP200)  
Dom, G., v197 (MO28)  
Domanski, L., v73 (SP162), v168 (SP449),  
v182 (SP490)  
Dombovari, J., v109 (SP271)  
Dombros, N., v349 (MP447)  
Domenech, N., v344 (MP432)  
Domenici, F.A., v108 (SP266)  
Domingos, M., v362 (MP486)  
Dominguez, A., v278 (MP230)  
Dominik, F., v175 (SP469)  
Don Moon, J., v237 (MP111)  
Donadio, C., v75 (SP167)  
Donauer, J., v253 (MP160)  
Donia, A.F., v168 (SP447), v222 (MP063)  
Doran, P., v371 (TO01)  
Dörr, H.G., v361 (#)  
dos Reis, L.M., v85 (SP195), v188 (MO04)  
Dötsch, J.W., v361 (#)  
Dou, L., v63 (SP134)  
Dougherty, F.C., v261 (MP183),  
v269 (MP206)  
Dounousi, E., v31 (SP035), v265 (MP194),  
v274 (MP219)  
Douto, P., v238 (MP114)  
Dovas, S., v30 (SP033), v77 (SP174),  
v83 (SP191)  
Downey, P., v213 (MP032)  
Doyle, A., v169 (SP452)  
Doyle, T., v56 (SP109)  
Draca, N., v95 (SP226)  
Draganis, Th., v43 (SP072)  
Draibe, S., v151 (SP394)  
Draibe, S.A., v105 (SP258), v189 (MO08),  
v276 (MP227)  
Drakopoulos, S., v177 (SP476)  
Drobisz, M., v282 (MP243)  
Drobnik, J., v131 (SP334), v132 (SP336)  
Drozdowska, A., v121 (SP305)  
Drozd, M., v270 (MP208), v303 (MP307),  
v305 (MP312)  
Drueke, T., v89 (SP210)  
Duarte, V., v71 (SP155)  
Dubois, R., v325 (MP375)  
Dubois, R.W., v143 (SP370)  
Dudko, M.U., v113 (SP282)  
Dudley, C., v366 (MP498, MP499)  
Dulawa, J., v282 (MP243)  
Duman, C., v201 (MO39)  
Duman, M., v219 (MP054)  
Duman, S., v111 (SP276), v201 (MO39),  
v304 (MP309), v312 (MP334),  
v358 (MP475)  
Dumler, F., v367 (#)  
Dunai, A., v68 (SP146)  
Dupuy, A.-M., v112 (SP279), v136 (SP349),  
v298 (MP291)  
Duraku, A., v256 (MP168)  
Duranay, M., v279 (MP234)  
Durand, D., v45 (SP076), v64 (SP137),  
v164 (SP435, SP436), v166 (SP441),  
v358 (MP473)  
Durand, P.-Y., v338 (MP412)  
Durkan, K., v38 (SP056)  
Durluk, M., v156 (SP411), v183 (SP492)  
Durov, M., v72 (SP158)  
Dursun, N., v70 (SP154)  
Dusilova Sulkova, S., v134 (SP344),  
v145 (SP375), v263 (MP189)  
Dusilova-Sulkova, S., v130 (SP332)  
Dusunsel, R., v346 (MP439)  
Dylan, M., v143 (SP370), v325 (MP375)  
Dzekova, P., v252 (MP157)  
Dziedziejko, V., v182 (SP490)  
Dzikova, S., v183 (SP493), v184 (SP496)  
Dzikova, S.L., v231 (MP090)  
Dzregah, B., v287 (MP260)  
Dzurik, R., v87 (SP203)
- E**
- Eadington, D., v142 (SP364), v145 (#),  
v148 (SP384)  
Ebeid, A.M., v341 (MP421, MP422)  
Ebrahim Entezari, A., v163 (SP434)  
Echeverria, A., v273 (MP218)  
Eckardt, K.-U., v16 (SO39), v22 (SP009),  
v42 (SP069), v54 (SP104)  
Economou, E.D., v127 (SP322)  
Edefonti, A., v342 (MP425)  
Edemir, B., v23 (SP010)  
Efrati, S., v39 (SP059), v204 (MP006)  
Efremov, G.D., v252 (MP157)  
Efstratiadis, G., v77 (SP174)  
Egea, J.J., v92 (SP217)  
Eichinger, F., v371 (TO01)  
Einollahi, B., v163 (SP434), v170 (SP455)  
Eiselt, J., v297 (#)  
Eitner, F., v8 (SO15)  
Ekart, R., v295 (MP283)  
Ekici, F., v60 (SP124)  
Ekim, M., v60 (SP124), v346 (MP439)  
Ekmekci, Y., v45 (SP078), v291 (MP270)  
Ekonomidou, D., v77 (SP174), v83 (SP191)  
El Esper, N., v99 (SP240), v100 (SP242)  
El Haggan, W., v13 (SO28)  
El Wakil, H.S., v51 (SP094)  
El-Agroudy, A.E., v80 (SP181), v361 (MP482)  
El-Banawy, S.E., v223 (MP065)  
El-Basuony, F.A., v222 (MP063)  
El-Chenawi, F.A., v215 (MP038)  
El-Dahshan, K.F., v161 (SP425), v168 (SP447)  
El-Esper, I., v83 (SP190)  
El-Husseini, A.A., v80 (SP181), v171 (SP456),  
v222 (MP063), v361 (MP482)  
El-Sayed, M.F., v80 (SP181), v361 (MP482)  
Elbir, Y., v352 (MP457)  
Elder, S.J., v326 (MP379)  
Elefante, L., v104 (#)  
Eleter, E.A., v341 (MP421, MP422)  
Elewa, K., v305 (MP313)  
Elfurayh, O.I.B.R., v162 (SP430)  
Elguindy, W.M., v341 (MP421, MP422)  
Elhan, A.H., v60 (SP124)  
Elkholy, O., v305 (MP313)  
Eloot, S., v114 (SP284), v314 (MP339),  
v339 (MP415)  
Elseviers, M.M., v6 (SO11), v44 (SP074)  
Emilio, G., v177 (SP477)  
Emilio, R., v270 (MP209)  
Eminbeyli, L., v288 (MP261)  
Emma, F., v245 (MP135)  
Emre, S., v351 (MP452)  
Emre Baysal, Y., v249 (MP148)  
Emrullai, E., v256 (MP168)  
Endoh, M., v205 (MP009)  
Engelmann, J., v122 (SP306)  
Enia, G., v301 (MP300)  
Ensari, A., v361 (MP484)  
Eras, J., v152 (SP397)  
Erbay, B., v8 (SO14), v62 (SP129),  
v361 (MP484)  
Erbil, K., v18 (SO43), v171 (SP457)  
Erdem, A., v136 (SP348)  
Erdem, Y., v26 (SP021), v304 (MP310),  
v305 (MP311)  
Erden, I., v147 (SP382)  
Erdogan, H., v285 (MP252)  
Erdogan, O., v15 (SO34), v355 (MP466)  
Erek, E., v149 (SP389), v184 (SP495)  
Eren, P., v169 (SP452)  
Eren, S., v134 (SP343)  
Eren, Z., v229 (MP085), v352 (MP457)  
Erez-Alon, N., v39 (SP059), v204 (MP006)  
Ergor, S., v180 (SP483)  
Ergun, I., v45 (SP078)  
Eriksson, U., v8 (SO15)  
Erkoc, R., v317 (MP349), v321 (MP364)  
Ermis, C., v312 (MP333)  
Ermolenko, V.M., v113 (SP282),  
v275 (MP223)  
Ernst, W., v160 (SP424)  
Ersoy, F., v15 (SO34), v311 (MP330),  
v312 (MP333), v355 (MP466),  
v356 (MP468)  
Ersoy, F.F., v349 (MP447)  
Ersoy, R., v48 (SP087)  
Ersöz, S., v147 (SP382)  
Erten, Y., v111 (SP275), v304 (MP308)  
Ertilav, M., v168 (SP450), v181 (SP486),  
v182 (SP489)  
Erturk, J., v219 (MP053)  
Erturk, S., v74 (SP165), v219 (MP054),  
v291 (MP270), v361 (MP484)  
Eryonucu, B., v321 (MP364)  
Esbrit, P., v27 (SP023), v206 (MP010)  
Escalante, J.C.G., v278 (MP230)  
Espejo, B.M., v87 (SP204)  
Espinoza, M., v253 (MP161)  
Espinoza, M., v47 (SP084)  
Esposito, A., v281 (MP240)  
Esposito, C., v197 (MO29), v208 (MP016),  
v296 (MP286)  
Esposito, L., v164 (SP436), v166 (SP441)  
Essaian, A.M., v80 (SP182), v141 (SP363)  
Estebanez, C., v337 (MP409)  
Esteva-Font, C., v37 (SP053)  
Esteve, V., v302 (MP303)  
Eun Kim, S., v207 (MP014)  
Eun Lee, J., v310 (MP326), v311 (MP331)  
Evangelista, C., v42 (SP068)  
Evenepoel, P., v13 (SO30), v14 (SO31),  
v66 (SP141), v197 (MO30), v335 (MP403),  
v372 (TO03)  
Evrenkaya, T.Rifki, v47 (SP082),  
v144 (SP371), v346 (MP437)

Eyileten, T., v18 (SO43), v168 (SP448),  
v171 (SP457), v212 (MP029, MP030)  
Eze, C., v58 (SP118)

## F

Fabbri, L.M., v180 (SP484)  
Faenza, S., v47 (SP085)  
Fagertun, H., v283 (MP246)  
Fagugli, R.M., v174 (SP465)  
Fajardo, C.M., v41 (SP065)  
Falkenhain, S., v335 (MP404)  
Faranna, P., v257 (MP173), v372 (TO06)  
Faria, B., v34 (SP045)  
Farjad, R., v279 (MP235)  
Farmer, C.K., v287 (MP260)  
Farmer, C.K.T., v66 (SP142)  
Farrington, K., v99 (SP238), v120 (SP300),  
v328 (MP384)  
Farrokhi, F., v163 (SP434)  
Fasianos, E., v139 (SP358)  
Fasoli, G., v197 (MO29), v208 (MP016),  
v296 (MP286)  
Fassbinder, W., v17 (SO41)  
Fatourou, A., v315 (MP343)  
Fatuzzo, P., v289 (MP265), v301 (MP300)  
Fauchald, P., v365 (MP496)  
Faure, P., v164 (SP435, SP436)  
Faure, V., v63 (SP134)  
Fauvel, J.-P., v61 (SP125)  
Fauvel, J.P., v242 (MP127)  
Favarò, A., v129 (SP329)  
Federici, G., v136 (SP347)  
Federico, S., v52 (SP099), v166 (SP443)  
Feest, T.G., v190 (MO10)  
Feher, L.Z., v40 (SP063)  
Feinstein, S., v190 (MO11)  
Felaco, M., v43 (SP071)  
Feldberg, I., v117 (SP293)  
Feldt Rasmussen, B., v263 (MP190)  
Fellström, B., v3 (SO01)  
Fenocchio, C.M., v336 (MP407)  
Fenske, W., v54 (SP105)  
Fenton, S., v9 (SO18)  
Fenwick, S., v12 (SO25)  
Fereshtehnejad, M., v167 (SP446)  
Feriozzi, S., v10 (SO20), v106 (SP262),  
v248 (MP143)  
Fernandez, L., v57 (SP112, SP113)  
Fernández, R., v39 (SP060), v40 (SP061)  
Fernandez, R., v143 (SP368)  
Fernández-Fresnedo, G., v278 (MP230)  
Fernandez-Fresnedo, G., v359 (MP477)  
Fernández-Llama, P., v37 (SP053)  
Fernandez-Najera, E., v154 (SP404)  
Ferramosca, E., v47 (SP085), v48 (SP086),  
v180 (SP484), v328 (MP383)  
Ferrandello, F.P., v152 (SP398), v153 (SP402)  
Ferrannini, M., v136 (SP347)  
Ferrari, F., v180 (SP484), v274 (MP220)  
Ferrari, P., v42 (SP068)  
Ferrario, F., v204 (MP005)  
Ferreira, G.R.N., v144 (SP373)  
Ferrell, W., v225 (MP073)  
Ferretti, A., v230 (MP087)  
Fervenza, F.C., v187 (MO02)  
Feuring, E., v160 (SP424)  
Fevzi Ersoy, F., v277 (MP228)  
Fialova, J., v130 (SP332)  
Fiat, E., v143 (SP368)  
Fickl, R., v167 (SP444)

Fidan, K., v63 (SP132)  
Figueiredo, J.F.C., v144 (SP373)  
Fijalkowska-Morawska, J., v81 (SP186)  
Filep, J.G., v23 (SP012)  
Filiopoulos, V., v43 (SP072)  
Filippi, C., v28 (SP028), v191 (MO13)  
Filipponi, F., v365 (MP494)  
Fillat, C., v194 (MO22)  
Fine, A., v319 (MP354)  
Finin, V.S., v239 (MP116)  
Finkel, R., v10 (SO21)  
Finn, W., v86 (SP201)  
Finn, W.F., v95 (SP227)  
Finne, P., v241 (MP124)  
Fiore, N., v218 (MP050)  
Firoozan, A., v167 (SP446)  
Firouzan, A., v163 (SP434), v170 (SP455)  
Fischer, D., v93 (SP221)  
Fischer, M.A., v243 (MP130)  
Fitzpatrick, J.M., v205 (MP007)  
Fixa, P., v220 (MP056)  
Flamion, B., v46 (SP079)  
Fleischmann, E.H., v69 (SP149)  
Fleitas, M.G., v278 (MP230)  
Fleming, C., v199 (MO35)  
Flenniken, A., v199 (MO35)  
Fliesher, S., v317 (MP350)  
Flinois, A., v271 (MP212)  
Fliser, D., v20 (SP001), v176 (SP472),  
v240 (#)  
Floccari, F., v90 (SP213)  
Floege, J., v8 (SO15), v13 (SO29),  
v16 (SO37), v20 (SP001), v29 (SP029),  
v105 (SP257), v188 (MO05)  
Florea, L., v223 (MP067)  
Flores, C., v234 (MP102)  
Fluck, R.J., v69 (SP151), v119 (SP298),  
v222 (MP062), v340 (MP419, MP420)  
Foda, M.A., v171 (SP456)  
Fodinger, M., v59 (SP119)  
Fodor, B., v336 (MP406)  
Fojcik, H., v235 (MP105)  
Földes, K., v180 (SP485)  
Foley, R.N., v99 (SP239)  
Fonte, G., v140 (SP359)  
Formanowicz, D., v318 (MP352)  
Fornara, P., v253 (MP160)  
Fort, J., v194 (MO20), v296 (MP285)  
Fort, M., v358 (MP473)  
Foster, J.E., v299 (MP293)  
Fournier, A., v83 (SP190), v99 (SP240),  
v100 (SP242), v101 (SP244), v167 (SP444)  
Fracchiolla, N., v31 (SP037)  
Fradinger, E., v86 (SP199)  
Fragaki, I., v126 (SP317), v331 (MP391)  
Francica, S., v10 (SO22)  
Francisco, O., v177 (SP477)  
Franco, M.d.C.P., v39 (SP058)  
Franke, S., v75 (SP168)  
Franquesa, M., v157 (SP415), v194 (MO22)  
Franquesa, Marcel.la, v20 (SP003)  
Franzoni, F., v75 (SP167), v97 (SP231),  
v123 (SP310)  
Frattini, G., v293 (MP275)  
Frazao, J.M., v89 (SP209)  
Frazier, E.T., v283 (MP247)  
Freemont, T., v376 (TO14)  
Fregonese, C., v11 (SO23)  
Frei, U., v54 (SP104), v175 (SP470),  
v253 (MP160)  
Freitas, L.W.C., v144 (SP373)

Friedrich, B., v107 (SP265)  
Friend, P.J., v3 (SO03)  
Frimat, L., v338 (MP412)  
Frisch, H., v25 (SP018)  
Frishberg, Y., v190 (MO11)  
Frisina, N., v306 (MP317)  
Fritsche, L., v175 (SP470), v253 (MP160)  
Froeyland, E.S., v128 (SP326)  
Frydecka, I., v159 (SP420)  
Frye, B.C., v29 (SP029)  
Fuck, F.B.S., v308 (MP322)  
Fuiano, G., v52 (SP099), v371 (TO02)  
Fujigaki, Y., v52 (SP097, SP098)  
Fujii, N., v82 (SP188), v139 (SP357)  
Fujino, Y., v103 (SP252), v373 (TO08)  
Fujita, H., v9 (SO17), v198 (MO33),  
v292 (MP273)  
Fujita, Y., v254 (MP163)  
Fujuoka, T., v20 (SP002)  
Fukastu, A., v228 (MP080)  
Fukuda, S., v126 (SP318)  
Fukuda, T., v9 (SO17), v112 (SP278),  
v198 (MO33), v292 (MP273), v375 (TO13)  
Fukuhara, H., v215 (MP040)  
Fukuhara, S., v326 (MP379)  
Fukuoka, K., v126 (SP318), v351 (MP454)  
Fulladosa, X., v356 (MP469)  
Furniss, A.L., v326 (MP379)  
Fuster, D., v97 (SP233)

## G

Gaberman, E., v24 (SP014)  
Gaggi, R., v334 (MP400)  
Gagliano, N., v155 (SP409)  
Gagliardi, G.M., v141 (SP361)  
Gai, M., v251 (MP152)  
Gailly, P., v3 (SO02)  
Gakis, D., v83 (SP191)  
Galanti, L., v357 (MP472)  
Galea, V.T.H., v127 (SP322)  
Galeano, C., v169 (SP451), v286 (MP255),  
v367 (MP502)  
Galetta, F., v75 (SP167), v97 (SP231),  
v123 (SP310)  
Galice, E., v77 (SP175), v286 (MP256)  
Gallagher, M., v254 (MP164)  
Galland, R., v26 (SP019), v137 (SP350),  
v333 (MP399)  
Gallar, P., v73 (SP163)  
Galle, J., v54 (SP105)  
Gallieni, M., v103 (SP251)  
Gallo, R., v166 (SP443)  
Galperin, E., v294 (MP279)  
Gambaro, G., v155 (SP407), v245 (MP135)  
Gandy, S.J., v280 (MP239)  
Gangemi, C., v232 (MP096)  
Gao, G., v299 (MP293)  
García, A., v360 (MP479)  
García, C., v256 (MP167)  
García, F., v296 (MP285)  
García, H., v347 (MP442)  
García, J., v234 (MP102), v239 (MP117)  
García, J., v322 (MP366)  
García, M., v302 (MP303)  
García Pérez, J., v348 (MP445)  
García Pérez, J.C., v308 (MP323)  
García-Buela, J., v135 (SP346)  
García-Donaire, J.A., v57 (SP112, SP113)  
García-Fernandez, N., v273 (MP218)



- García-López, E., v353 (MP460)  
 García-Naveiro, R., v342 (MP424)  
 García-Valdecasas, J., v253 (MP161)  
 Gargin, V.V., v236 (MP107)  
 Garibotto, G., v204 (MP005), v374 (TO09)  
 Gârneata, L., v267 (MP201), v272 (MP215)  
 Garzoni, D., v122 (SP306)  
 Gascon-Barré, M., v26 (SP020)  
 Gaspar, A., v12 (SO27)  
 Gaspare De Santo, N., v153 (SP400)  
 Gatti, E., v187 (MO01), v302 (MP302), v307 (MP319)  
 Gatti, V., v274 (MP220)  
 Gatzemeyer, S., v15 (SO36)  
 Gauly, A., v122 (SP306), v336 (MP406)  
 Gavela, E., v154 (SP404), v164 (SP437)  
 Gavrilovici, C., v36 (SP049)  
 Gawlik, A., v199 (MO35)  
 Gaydarova, M.S., v94 (SP225)  
 Geddes, C., v248 (MP145)  
 Gejyo, F., v256 (MP170)  
 Gelev, S., v95 (SP228), v376 (TO14)  
 Gelu-Mantoulet, S., v262 (MP187)  
 Gema, F.-F., v270 (MP209)  
 Gemmel, D.J., v264 (MP192)  
 Genç, V., v147 (SP382)  
 Gennaro, C., v356 (MP467)  
 Gentile, A., v166 (SP443)  
 Georgalidis, K., v238 (MP114)  
 George Fantus, I., v23 (SP011)  
 Georgiev, M.I., v286 (MP257)  
 Georgievska-Ismail, L., v116 (SP289)  
 Georgitsogiannakou, M., v341 (MP423), v351 (MP453)  
 Gerace, G., v141 (SP361)  
 Gerakari, S., v51 (SP096)  
 Gerardo Oliveira, J., v166 (SP442), v213 (MP034)  
 Gerasimovska, V., v154 (SP403)  
 Gerasimovska-Kitanovska, B., v154 (SP403)  
 Gerhard, M.A., v43 (SP070)  
 Germino, G.G., v247 (MP142)  
 Gerth, J., v81 (SP187), v82 (SP189)  
 Gesualdo, L., v4 (SO04), v31 (SP036), v139 (SP358), v158 (SP416), v160 (SP423), v163 (SP433), v192 (MO16), v203 (MP002), v214 (MP037), v216 (MP042), v217 (MP047), v218 (MP050), v246 (MP137)  
 Geun Han, B., v47 (SP083), v294 (MP280)  
 Ghafari, A., v167 (SP445)  
 Gharbi Benghanem, M., v101 (SP246)  
 Gheith, O.E., v161 (SP425)  
 Ghisellini, L., v32 (SP040), v33 (SP041), v158 (SP417)  
 Ghods, A.J., v176 (SP471)  
 Ghoneim, M.A., v80 (SP181), v161 (SP425), v171 (SP456), v361 (MP482)  
 Giacaman, A., v213 (MP032)  
 Giacchino, F., v366 (MP497)  
 Giachino, O., v10 (SO22)  
 Giamalis, P., v83 (SP191)  
 Giammaria, B., v150 (SP392)  
 Gianiorio, F., v204 (MP005)  
 Giannitsis, E., v292 (MP274)  
 Giannopoulou, I., v16 (SO38)  
 Giannoulis, G., v51 (SP096)  
 Gianoglio, B., v342 (MP425)  
 Giardinelli, A., v43 (SP071)  
 Giedrys-Kalemba, S., v180 (SP482)  
 Gigante, M., v192 (MO16), v246 (MP137)  
 Gil, C.C., v154 (SP405)  
 Gil, F.Z., v39 (SP058)  
 Gil, M.T., v92 (SP217)  
 Gil Park, S., v174 (SP467)  
 Gil-Vernet, S., v357 (MP470)  
 Gilardi, S., v210 (MP023), v317 (MP348)  
 Gilbertson, D.T., v7 (SO13), v283 (MP247)  
 Gill, M., v376 (TO14)  
 Gillin, A., v90 (SP212)  
 Giménez, C., v244 (MP132)  
 Gimeno, C., v65 (SP138)  
 Ginikopoulou, E., v346 (MP438), v354 (MP461)  
 Gioia, M., v155 (SP409)  
 Giordano, R., v116 (SP290)  
 Giraudi, R., v4 (SO05)  
 Giron, L., v143 (SP368)  
 Gisler, S.M., v187 (MO03)  
 Giuliano, M.G., v109 (SP269)  
 Giulio, B., v306 (MP317)  
 Gizzi, F., v43 (SP071)  
 Gjata, M., v56 (SP111)  
 Glez Parra, E., v253 (MP161)  
 Gloer, D., v115 (SP288)  
 Glorieux, G., v218 (MP048), v293 (MP277), v294 (MP278)  
 Glotz, D., v271 (MP212)  
 Gminski, J., v282 (MP243)  
 Gnazi, S., v300 (MP297)  
 Gock, H., v254 (MP164)  
 Goebner, S., v105 (SP257)  
 Goettmann, U., v159 (SP421)  
 Goffin, E., v188 (MO06)  
 Gogoll, L., v299 (#), v311 (MP329)  
 Gokal, R., v262 (MP188)  
 Gokce, C., v67 (SP144), v313 (MP336)  
 Gokden, N., v223 (MP066)  
 Goldberg, L., v56 (SP109)  
 Goldfinger, N., v39 (SP059), v204 (MP006)  
 Goldoni, M., v331 (MP391)  
 Goldsmith, D., v36 (SP049), v271 (MP211)  
 Goldsmith, D.J., v266 (MP197), v271 (MP210)  
 Goldsmith, D.J.A., v291 (MP269)  
 Golestanpoor, A., v284 (MP250)  
 Golik, A., v39 (SP059), v204 (MP006)  
 Golnari, P., v167 (SP446)  
 Gomà, M., v20 (SP003)  
 Goma, M., v356 (MP469), v357 (MP470)  
 Gomes, G.N., v39 (SP058)  
 Gomez, C., v144 (SP372)  
 Gonen, S., v63 (SP132), v220 (MP057)  
 González, F., v232 (MP094)  
 Gonzalez, V., v65 (SP138)  
 Gonzalez Parra, E., v339 (MP416)  
 González-Espinoza, L., v202 (MO42), v349 (MP448), v350 (MP450, MP451)  
 Goppelt-Struebe, M., v209 (MP020)  
 Goral, S., v169 (SP452)  
 Gori, E., v341 (MP423), v351 (MP453)  
 Gorri, J.L., v17 (SO40), v79 (SP179), v84 (SP194), v154 (SP404)  
 Gorski, A., v156 (SP411), v159 (SP420)  
 Goto, T., v52 (SP098)  
 Goucha, R., v285 (MP253)  
 Goudevenos, I.A., v260 (MP180), v301 (MP301)  
 Goumas, E., v115 (SP287)  
 Goumenos, D.S., v228 (MP083)  
 Gouva, Ch., v115 (SP287)  
 Gouva, Ch.D., v260 (MP180), v301 (MP301)  
 Grabensee, B., v181 (SP487), v183 (SP494), v230 (MP089), v303 (MP306), v327 (MP381), v335 (MP405)  
 Gracioli, F.G., v85 (SP195), v105 (SP258), v188 (MO04)  
 Graeme Houston, J., v280 (MP239)  
 Graf, S., v17 (SO41)  
 Grajewska, M., v76 (SP170)  
 Grammatico, F., v47 (SP085), v48 (SP086), v328 (MP383)  
 Granada, M., v364 (MP491)  
 Granato, P., v307 (MP319)  
 Granato, T., v217 (MP047)  
 Grandaliano, G., v4 (SO04), v147 (SP381), v158 (SP416), v160 (SP423), v163 (SP433), v198 (MO32), v203 (MP002), v217 (MP047), v218 (MP050), v260 (MP182)  
 Graness, A., v209 (MP020)  
 Grassi, G., v218 (MP049)  
 Grazi, G., v191 (MO13)  
 Grazia Facchini, M., v328 (MP383)  
 Grecevska, L.P., v231 (MP090)  
 Grebe, S.O., v175 (SP469), v323 (MP367)  
 Green, J., v25 (SP016)  
 Gregorini, M., v28 (SP027), v203 (MP003), v210 (MP023), v317 (MP348)  
 Grekas, D., v128 (SP325)  
 Grekas, D.M., v314 (MP338)  
 Grenda, R., v210 (MP022)  
 Griera, M., v206 (MP012)  
 Griffiths, R., v325 (MP375)  
 Griffiths, R.I., v143 (SP370)  
 Grigioni, W., v365 (MP494)  
 Grinyó, J.M., v20 (SP003), v157 (SP415), v194 (MO22), v356 (MP469), v357 (MP470)  
 Grinyo, J.M., v71 (SP155), v165 (SP439)  
 Grispou, U., v177 (SP476)  
 Gritters, M., v123 (SP311), v124 (SP312)  
 Griveas, I., v346 (MP438), v354 (MP461)  
 Groene, H.J., v371 (TO01)  
 Gromiko, V.N., v239 (MP116)  
 Grønhaugen-Riska, C., v3 (SO01)  
 Grønhaugen-Riska, C., v241 (MP124)  
 Groop, P.-H., v241 (MP124)  
 Grooteman, M.P.C., v123 (SP311), v124 (SP312)  
 Gropuzzo, M., v11 (SO23), v358 (MP474)  
 Grosjean, F., v208 (MP016)  
 Gross, M.-L., v36 (SP051)  
 Gross, M.-L.P., v37 (SP054), v38 (SP055)  
 Grossman, R., v169 (SP452)  
 Grothe, C., v151 (SP394)  
 Grozdanovski, R., v95 (SP228), v116 (SP289)  
 Grzeszczak, W., v127 (SP323), v175 (SP468), v235 (MP105)  
 Grzybowska, E., v309 (MP325)  
 Gu, Y., v203 (MP001), v376 (TO16)  
 Guan, Y., v235 (MP106)  
 Guarena, C., v336 (MP407)  
 Guasticchi, G., v121 (SP303)  
 Guastoni, C., v341 (MP423), v351 (MP453)  
 Güçer, S., v217 (MP046)  
 Gudel Greguric, J., v289 (MP264)  
 Guenther Wahl, H., v17 (SO41)  
 Guerin, A., v18 (SO42), v299 (MP294)  
 Guerrero, L., v57 (SP112, SP113)  
 Guerriero, M., v371 (TO02)  
 Guggino, W.B., v197 (MO28)  
 Guh, J.-Y., v67 (SP143), v209 (MP021)

Guiba-Tziabiri, O., v265 (MP194)  
 Guidetti, C., v28 (SP027), v203 (MP003),  
 v210 (MP023), v317 (MP348)  
 Guillon, D., v339 (MP417)  
 Guirado, L., v6 (SO10)  
 Guitard, J., v45 (SP076), v64 (SP137)  
 Gulati, K., v225 (MP072)  
 Gulati, S., v225 (MP072)  
 Gulec, B., v168 (SP448)  
 Guleria, S., v323 (MP369)  
 Gulías, O., v157 (SP415)  
 Gultekin, M., v349 (MP447)  
 Gultepe, M., v47 (SP082)  
 Gunduz, Z., v70 (SP154)  
 Guney, I., v325 (MP374)  
 Gungor, F., v249 (MP148)  
 Gungor, G., v61 (SP126)  
 Gupta, S., v323 (MP369)  
 Gur Guven, A., v249 (MP148), v346 (MP439)  
 Guray, M., v208 (MP018)  
 Gurevich, A.K., v338 (MP413)  
 Gurevich, K.Y., v275 (MP223), v338 (MP413)  
 Gurkan, A., v15 (SO34), v277 (MP228),  
 v356 (MP468)  
 Gusbeth-Tatomir, P., v172 (SP461),  
 v223 (MP067), v291 (MP269)  
 Gutierrez, C., v256 (MP167)  
 Gutiérrez-Chávez, J., v202 (MO42),  
 v350 (MP450)  
 Guven, B., v229 (MP085)  
 Guz, G., v111 (SP275), v304 (MP308)  
 Gwinner, W., v158 (SP418)

## H

Ha, H., v12 (SO26), v157 (SP414),  
 v201 (MO40), v207 (MP013, MP014)  
 Ha, S.-K., v240 (MP120)  
 Ha Huh, K., v98 (SP235, SP236),  
 v173 (SP463)  
 Haas, J.A., v40 (SP062), v65 (SP140)  
 Haba, T., v205 (MP009)  
 Haberal, M., v4 (SO06), v131 (SP333, SP335),  
 v136 (SP348), v138 (SP355), v149 (SP387),  
 v161 (SP427), v162 (SP429), v177 (SP475),  
 v179 (SP481), v201 (MO41),  
 v209 (MP019), v258 (MP174),  
 v266 (MP198), v297 (MP289),  
 v300 (MP296), v347 (MP441),  
 v355 (MP465)  
 Habibi, B., v273 (MP216)  
 Haditsch, B., v25 (SP018), v117 (SP292),  
 v345 (MP433), v372 (TO04)  
 Hadj-Aissa, A., v61 (SP125)  
 Hadjiconstantinou, V.E., v34 (SP046),  
 v127 (SP322)  
 Hadjikonstantinou, B., v177 (SP476)  
 Hadjipetrou, A.I., v363 (MP489)  
 Hagen, E., v283 (MP246)  
 Haidar Pour, M., v232 (MP095)  
 Haier, J., v23 (SP010)  
 Haj-Aghai, M., v49 (SP088)  
 Hajizadeh, N., v232 (MP095)  
 Hak Song, K., v47 (SP083)  
 Haktanir, A., v67 (SP144), v155 (SP406)  
 Halki, A., v238 (MP114)  
 Haller, H., v20 (SP001), v176 (SP472),  
 v240 (#), v253 (MP160)  
 Haluzik, M., v9 (SO19), v134 (SP344)  
 Hamano, T., v82 (SP188), v139 (SP357)  
 Hamet, P., v23 (SP011, SP012)

Hamidi, Z., v81 (SP185)  
 Hammad, D., v340 (MP418)  
 Hammoudah, S.A.F., v308 (MP321)  
 Hampl, H., v299 (#), v311 (MP329)  
 Hamplova, V., v68 (SP147)  
 Han, D.-S., v126 (SP319), v310 (MP326,  
 MP328), v311 (MP331)  
 Han, R., v364 (MP492)  
 Han, S.-J., v374 (TO10)  
 Han, S.-W., v237 (MP111)  
 Handan Ozdemir, B., v4 (SO06),  
 v161 (SP427), v177 (SP475),  
 v209 (MP019), v355 (MP465)  
 Hanke, H., v55 (SP108)  
 Hankovszky, P., v40 (SP063)  
 Hanuka, N., v253 (MP158)  
 Hara, H., v76 (SP171)  
 Harazny, J., v195 (MO23)  
 Harbouche, L., v99 (SP240), v100 (SP242),  
 v101 (SP244), v167 (SP444)  
 Harissis, H.V., v145 (SP377)  
 Harris, D., v254 (MP164)  
 Harrison, D., v50 (SP091)  
 Harry, L., v167 (SP444)  
 Hartmann, A., v165 (SP439), v199 (MO34),  
 v365 (MP496)  
 Hartner, A., v207 (MP015), v214 (MP036),  
 v245 (MP134)  
 Hasanoglu, E., v8 (SO14), v62 (SP129),  
 v220 (MP057)  
 Hase, H., v76 (SP171), v102 (SP248)  
 Hasegawa, M., v170 (SP454), v214 (MP035),  
 v316 (MP347)  
 Hashimoto, T., v9 (SO17), v112 (SP278),  
 v198 (MO33), v292 (MP273), v375 (TO13)  
 Hassan, D., v43 (SP070)  
 Hassan, M.S., v269 (MP207)  
 Hassan, N.A., v222 (MP063)  
 Hassan, Y.M., v125 (SP315)  
 Hassan Mitwalli, A., v340 (MP418)  
 Hatafuku, F., v20 (SP002)  
 Hatamizadeh, P., v45 (#), v46 (#),  
 v284 (MP250)  
 Hatamura, I., v87 (SP202)  
 Haubitz, M., v20 (SP001), v158 (SP418)  
 Hayama, S., v276 (MP226)  
 Haydar, A.A., v271 (MP210, MP211),  
 v291 (MP269)  
 Haykal, W.J., v198 (MO31), v293 (MP276)  
 Healy, D.A., v205 (MP007)  
 Hecke, N.S., v292 (MP274)  
 Hee Chung, S., v201 (MO40)  
 Hee Kim, D., v226 (MP074)  
 Hee Kim, J., v211 (MP026)  
 Hee Lee, H., v46 (SP081)  
 Hee Lee, T., v240 (MP120)  
 Heering, P., v303 (MP306)  
 Heering, P.J., v181 (SP487), v230 (MP089)  
 Hegarty, J., v72 (SP158), v193 (MO19)  
 Hegarty, J.E., v363 (MP490), v367 (MP501)  
 Heidland, A., v306 (MP316)  
 Heimbürger, O., v78 (SP177), v83 (SP192),  
 v84 (SP193), v99 (SP237), v130 (SP331),  
 v137 (SP351), v309 (MP324),  
 v312 (MP332), v353 (MP460)  
 Hélène Reboux, A., v358 (MP473)  
 Helmchen, U., v15 (SO36), v224 (MP070)  
 Henger, A., v371 (TO01)  
 Henley, C., v196 (MO26), v204 (MP004)  
 Hennig, L., v299 (#), v311 (MP329)  
 Henrich, D.M., v6 (SO09), v100 (SP243)

Henriques-Coelho, T., v42 (SP067)  
 Henríquez, F., v239 (MP117)  
 Herczenik, E., v40 (SP064)  
 Hering, D., v60 (SP123)  
 Hering, K., v236 (MP108)  
 Hernandez, A., v73 (SP163)  
 Hernandez, F.R., v189 (MO08)  
 Hernandez-Jaras, J., v347 (MP442)  
 Herr, W., v214 (MP037)  
 Herranz, B., v206 (MP011)  
 Herrero, I., v20 (SP003)  
 Herrero, J., v348 (MP445)  
 Herrero, J.A., v308 (MP323)  
 Herrero-Fresneda, I., v157 (SP415),  
 v194 (MO22)  
 Hershkovitz, R., v68 (SP148)  
 Hertlová, M., v220 (MP056)  
 Hetzel, G.R., v335 (MP405)  
 Heun Song, S., v211 (MP026)  
 Heussen, N., v13 (SO29)  
 Hickstein, H., v122 (SP306)  
 Hicyilmaz, H., v49 (SP090)  
 Hidai, H., v93 (SP222), v108 (SP267)  
 Higa, A., v189 (MO08)  
 Higuchi, C., v208 (MP017)  
 Hihara, T., v313 (MP335)  
 Hiki, Y., v170 (SP454), v214 (MP035),  
 v316 (MP347)  
 Hilgers, K.F., v22 (SP009), v42 (SP069),  
 v207 (MP015), v214 (MP036),  
 v245 (MP134)  
 Hillmann, M., v14 (SO33)  
 Hinghofer-Szalkay, H., v25 (SP018)  
 Hippensteel, R., v88 (SP207)  
 Hiramatsu, M., v256 (MP169)  
 Hiranaka, T., v143 (SP369)  
 Hirano, T., v108 (SP267)  
 Hirano, Y., v112 (SP280)  
 Hirayama, A., v276 (MP225)  
 Hirayama, T., v93 (SP222)  
 Hirokoshi, K., v351 (MP454)  
 Hishida, A., v52 (SP097, SP098)  
 Hjelm[aelig]th, J., v199 (MO34)  
 Ho Kim, G., v362 (MP487)  
 Ho Kim, N., v35 (SP048)  
 Ho Lee, J., v46 (SP081)  
 Ho Park, G., v134 (SP342), v226 (MP075),  
 v298 (MP292)  
 Ho Shin, Y., v221 (MP059, MP060),  
 v278 (MP233)  
 Ho Song, J., v134 (SP342), v226 (MP075),  
 v298 (MP292)  
 Hodkova, M., v130 (SP332)  
 Hoeger, S., v159 (SP421)  
 Hoenderop, J.G.J., v98 (SP234), v199 (MO36)  
 Hoerl, M.P., v28 (SP025)  
 Hoerl, W.H., v275 (MP222)  
 Hoffmann, J., v353 (MP458)  
 Hoffmann, M., v6 (SO09), v100 (SP243)  
 Hojs, R., v295 (MP283)  
 Holdaas, H., v3 (SO01), v199 (MO34),  
 v283 (MP246), v365 (MP496)  
 Holzer, H., v25 (SP018), v89 (SP209, SP210),  
 v117 (SP292), v345 (MP433), v372 (TO04)  
 Hommann, M., v82 (SP189)  
 Honcová, E., v220 (MP056)  
 Honda, H., v309 (MP324)  
 Honecker, A., v100 (SP243)  
 Hong, Q., v194 (MO21)  
 Hong, S.-Y., v331 (MP393)  
 Hong Kim, J., v221 (MP058), v231 (MP091)

- Hooda, A.K., v178 (SP479)  
 Horackova, M., v278 (MP231)  
 Horie, A., v214 (MP035)  
 Hörl, W.H., v263 (MP190), v292 (MP272)  
 Horl, W.H., v59 (SP119)  
 Hörstrup, J.H., v175 (SP470)  
 Hoscoskun, C., v168 (SP450), v182 (SP489)  
 Hoseinejad, A., v81 (SP185)  
 Hoseini, R., v167 (SP446), v279 (MP235)  
 Hoseinpoor Rafati, A., v284 (MP250)  
 Hoste, E., v6 (SO11), v44 (SP074),  
 v280 (MP237)  
 Hoti, E., v56 (SP111)  
 Hoti, K., v56 (SP111)  
 Hsieh, R.-Y., v320 (MP359)  
 Hsieh, T.-J., v23 (SP011)  
 Hsieh, W., v327 (MP380)  
 Hsu, K.-H., v157 (SP413)  
 Hsu, S.-P., v106 (SP259), v268 (MP203)  
 Hsu, Y.-J., v246 (MP138)  
 Hsueh Lee, C., v210 (MP024)  
 Huang, C.-S., v133 (SP340)  
 Huang, J.-J., v320 (MP359)  
 Huang, J.-W., v106 (SP259)  
 Hugo, C., v236 (MP108)  
 Huisman, R.M., v78 (SP176), v190 (MO09)  
 Hulme, L.J., v69 (SP151)  
 Hun Choi, K., v126 (SP319), v310 (MP326,  
 MP328), v311 (MP331)  
 Hun Lee, S., v144 (SP374), v148 (SP386)  
 Hung, K.-Y., v106 (SP259), v133 (SP340),  
 v268 (MP203)  
 Hunsicker, L.G., v75 (SP168)  
 Hurault de Ligny, B., v13 (SO28)  
 Hurtel, A.-S., v167 (SP444)  
 Husmann, D.A., v40 (SP062)  
 Huszna, J., v193 (MO17)  
 Hutchison, A., v5 (SO07), v92 (SP219),  
 v93 (SP220)  
 Hutton, H., v89 (SP209)  
 Hutton, S., v89 (SP210), v197 (MO30)  
 Hwan Kwon, K., v98 (SP236)  
 Hwang, S.-J., v315 (MP341)  
 Hwang, S., v153 (SP401)  
 Hyodo, T., v93 (SP222), v108 (SP267)
- I**
- Iacovides, A.I., v314 (MP338)  
 Iannone, A., v274 (MP220)  
 Ianuziello, F., v116 (SP290)  
 Ibernou, M., v356 (MP469), v357 (MP470)  
 Ibis, A., v266 (MP198)  
 Ibrahim, N., v122 (SP306)  
 Ibrik, O., v143 (SP367)  
 Icardi, A., v259 (MP177)  
 Idrizi, A., v56 (SP111), v256 (MP168)  
 Iehara, N., v228 (MP080)  
 Ignacy, W., v195 (MO24)  
 Ignacz, Z., v109 (SP271)  
 Ignatova, M., v69 (SP150)  
 Iguchi, Y., v313 (MP335)  
 Ihara, T., v228 (MP080)  
 Ihsan, G.A., v345 (MP435)  
 Iijima, H., v205 (MP009)  
 Iijima, R., v76 (SP171)  
 Ikeda, N., v347 (MP440)  
 Ikejiri, A., v108 (SP267)  
 Il Kim, S., v173 (SP463), v174 (SP467)  
 Il Shin, J., v221 (MP058, MP059, MP060),  
 v226 (MP074), v231 (MP091),  
 v278 (MP232, MP233)  
 Il Yoon, K., v146 (SP378), v323 (MP368)  
 Ilhan, M., v288 (MP261)  
 Ilhan, N., v345 (MP435)  
 Iliopoulos, A.N., v343 (MP428),  
 v363 (MP489)  
 Ilker Yilmaz, M., v18 (SO43), v168 (SP448),  
 v171 (SP457), v212 (MP029, MP030)  
 Ilyinsky, I.M., v173 (SP464)  
 Im Youngson, H., v268 (MP204)  
 Imai, E., v82 (SP188), v139 (SP357)  
 Imamura, Y., v102 (SP248)  
 Imbasciati, E., v329 (MP387)  
 Inaba, M., v103 (SP252), v373 (TO08)  
 Indaco, R., v220 (MP055), v234 (MP100)  
 Infante, B., v4 (SO04), v158 (SP416),  
 v160 (SP423)  
 Ingale, A.V., v279 (MP236)  
 Ingale, F.A., v279 (MP236)  
 Ingelfinger, J.R., v23 (SP011, SP012)  
 Inglis, H., v123 (SP309)  
 Ingsathit, A., v252 (MP156)  
 Inguaggiato, P., v51 (SP095)  
 Innocenti, M., v75 (SP167), v218 (MP049)  
 Inou, T., v80 (SP183)  
 Inoue, M., v276 (MP225)  
 Inoue, N., v9 (SO17), v198 (MO33),  
 v292 (MP273)  
 Inoue, T., v347 (MP440)  
 Ioannou, K., v31 (SP035)  
 Ionescu, C.I., v77 (SP175), v228 (MP081),  
 v286 (MP256)  
 Ippolito, S., v272 (MP214)  
 Iqbal, M.M., v269 (MP207)  
 Irsigler, K., v243 (MP129)  
 Isaka, Y., v82 (SP188)  
 Ishida, I., v214 (MP035)  
 Ishikawa, I., v276 (MP226)  
 Ishimura, E., v103 (SP252), v373 (TO08)  
 Ishinaga, Y., v313 (MP335)  
 Isik Agras, P., v133 (SP338), v179 (SP481)  
 Isikoglu, B., v24 (SP013)  
 Islam, M.N., v269 (MP207)  
 Islam, M.S., v269 (MP207)  
 Ismail, A.M., v161 (SP425)  
 Ismail, G.B., v77 (SP175), v228 (MP081),  
 v286 (MP256)  
 Isnani, A., v340 (MP418)  
 Israni, A., v169 (SP452)  
 Istad, H., v283 (MP246)  
 Itaya, H., v76 (SP171)  
 Ito, T., v82 (SP188), v139 (SP357)  
 Ito, Y., v108 (SP267)  
 Itoh, M., v214 (MP035)  
 Ittel, T.H., v13 (SO29)  
 Iuliano, R., v371 (TO02)  
 Ivanov, D.D., v240 (MP119)  
 Ivanovski, N., v183 (SP493), v184 (SP496)  
 Ivens, K., v181 (SP487), v183 (SP494),  
 v230 (MP089), v303 (MP306)  
 Iwakubo, M., v205 (MP009)  
 Iwase, H., v214 (MP035)  
 Iyoda, M., v318 (MP353)  
 Izumotani, T., v103 (SP252)  
 Izzedine, H., v280 (MP238)
- J**
- Jabbari, M., v176 (SP471), v284 (MP250)  
 Jablkowski, M., v81 (SP186)  
 Jackson, G., v54 (SP103)  
 Jackson, M.J., v211 (MP028), v237 (MP110)  
 Jacobs, P., v218 (MP048), v293 (MP277),  
 v294 (MP278)  
 Jacobson, S.H., v215 (MP041)  
 Jadoul, M., v188 (MO06), v357 (MP472)  
 Jae Kim, M., v226 (MP075)  
 Jaffry, N., v26 (SP020)  
 Jagodzinski, P., v101 (SP245)  
 Jahnhen-Dechent, W., v16 (SO37),  
 v105 (SP257)  
 Jaime, A., v177 (SP477)  
 Jaimez, E., v65 (SP138)  
 Jais, J.-P., v212 (MP031)  
 Jakic, M., v348 (MP446)  
 Jaksic, E., v364 (MP492)  
 Jaksic, V., v321 (MP362)  
 Jakubowska, K., v182 (SP490)  
 Jalil, R.D., v41 (SP065)  
 Jamil, B., v109 (SP270)  
 Jan, Z., v74 (SP166)  
 Jancová, E., v244 (MP131)  
 Jancova, E., v220 (MP056), v233 (MP099)  
 Janczarek, M., v148 (SP385)  
 Janda, J., v220 (MP056)  
 Janda, K., v309 (MP325)  
 Janessa, A., v107 (SP265)  
 Jang, G., v255 (MP165, MP166)  
 Jang, K., v348 (MP443)  
 Janicka, K., v148 (SP385)  
 Janicka, L., v77 (SP173), v148 (SP385)  
 Jankovic, L., v105 (SP256)  
 Jankowski, J., v293 (MP277)  
 Jankowski, V., v293 (MP277)  
 Janning, G., v115 (SP288)  
 Jansen, J., v180 (SP485)  
 Janusz-Grzybowska, E., v270 (MP208)  
 Jaque, M.P., v41 (SP065)  
 Járay, J., v180 (SP485)  
 Jardine, A., v3 (SO01)  
 Jardine, A.G., v299 (MP293)  
 Jarmuzek, W., v210 (MP022)  
 Jasek, M., v159 (SP420)  
 Jassal, V.S., v350 (MP449)  
 Jaussent, I., v136 (SP349), v298 (MP291)  
 Javidan, M., v331 (MP392)  
 Jayaprakasam, A., v261 (MP185)  
 Jean, G., v337 (MP410)  
 Jedras, M., v80 (SP184)  
 Jenabi, A., v176 (SP471), v284 (MP250)  
 Jenei, C., v50 (SP093)  
 Jennings, P., v219 (MP052)  
 Jenssen, T., v199 (MO34)  
 Jerabek, Z., v297 (#)  
 Jeren Strujic, B., v289 (MP264)  
 Jeyaraj, B., v49 (SP089)  
 Jezior, D.A., v179 (SP480)  
 Jian Wen, G., v14 (SO32)  
 Jimenez, W., v37 (SP053)  
 Jin, Y., v74 (SP166)  
 Jin Choi, E., v113 (SP283), v144 (SP374)  
 Jin Kim, H., v126 (SP319)  
 Jin Park, T., v274 (MP221)  
 Jirasiritham, S., v252 (MP156)  
 Jiri, C., v278 (MP231)  
 Jiri, L., v177 (SP474)  
 Jirka, T., v18 (SO44)  
 Joannidis, M., v219 (MP052)  
 João Pais, M., v262 (MP188)  
 Jofre, R., v90 (SP211)  
 Joh, J., v153 (SP401)

- Johnson, R., v366 (MP498)  
 Johnson, R.J., v366 (MP499)  
 Johny, K.V., v265 (MP196)  
 Joki, N., v76 (SP171), v102 (SP248)  
 Jones, I., v64 (SP135)  
 Jong Kim, H., v126 (SP319), v310 (MP326, MP328), v311 (MP331)  
 Joo, M.-H., v374 (TO10)  
 Joo Heo, N., v284 (MP248)  
 Joo Jeong, H., v174 (SP467), v221 (MP058, MP059, MP060), v231 (MP091)  
 Joon Kim, M., v278 (MP232, MP233)  
 Jorge, C., v12 (SO27)  
 Jorgetti, V., v85 (SP195), v105 (SP258), v188 (MO04)  
 Jose Egea, J., v86 (SP200)  
 Joss, N., v248 (MP145)  
 Jouanneau, C., v211 (MP027)  
 Jouret, F., v22 (SP008), v197 (MO28)  
 Jozefowski, K., v16 (SO39)  
 Jozwiak, L., v235 (MP103)  
 Juan Carlos, R., v270 (MP209)  
 Juhasz, E., v150 (SP390)  
 Juhasz, M., v325 (MP376)  
 Juillard, L., v40 (SP062), v65 (SP140)  
 Julia, E., v144 (SP372)  
 Julio, C.G., v270 (MP209)  
 Jun, K.-O., v173 (SP463)  
 Jun Liu, S., v203 (MP001)  
 Jung, A., v372 (TO04)  
 Jung Han, N., v234 (MP101)  
 Jung Kim, H., v98 (SP235, SP236), v173 (SP463)  
 Jung Shin, M., v148 (SP386)  
 Jung Song, W., v113 (SP283)  
 Jürgensen, J.S., v175 (SP470)  
 Juric, K., v289 (MP264)
- K**
- Kaaroud, H., v285 (MP253)  
 Kaasjager, K.A.H., v74 (SP164)  
 Kabasakal, C., v180 (SP483)  
 Kabat-Koperska, J., v182 (SP490)  
 Kacprzyk, F., v224 (MP068), v225 (MP071)  
 Kaczmarek, E., v216 (MP044)  
 Kadam, N.N., v279 (MP236)  
 Kade, G., v285 (MP254)  
 Kadiroglu, A.K., v24 (SP013)  
 Kaemmerer, D., v82 (SP189)  
 Kahraman, S., v304 (MP310)  
 Kahveci, A., v149 (SP389)  
 Kainer, G., v277 (#)  
 Kaiser, E., v10 (SO20)  
 Kaissling, B., v187 (MO03)  
 Kakuk, G., v109 (SP271), v326 (MP378)  
 Kalb, K., v115 (SP288)  
 Kale, G., v217 (MP046)  
 Kalender, B., v139 (SP356), v301 (MP299), v324 (MP370)  
 Kalliakmani, P., v228 (MP083)  
 Kalousova, M., v130 (SP332)  
 Kalouvolos, M., v77 (SP174)  
 Kalpidis, P., v346 (MP438)  
 Kalra, P.A., v72 (SP158), v193 (MO19)  
 Kalra, V., v360 (MP480)  
 Kalyoncu, U., v304 (MP310)  
 Kamali-Ernst, S., v160 (SP424)  
 Kamar, N., v45 (SP076), v64 (SP137), v164 (SP435, SP436), v166 (SP441), v358 (MP473)  
 Kamenz, J., v55 (SP108)  
 Kamgne, Y.D., v55 (SP108)  
 Kaminski, M., v182 (SP490)  
 Kamoun, M., v169 (SP452)  
 Kamyshova, E.S., v72 (SP159), v219 (#)  
 Kanaa, M., v123 (SP309)  
 Kandemir, E.Gokhan, v47 (SP082)  
 Kang, D.-H., v92 (SP216), v146 (SP378), v323 (MP368)  
 Kang, S.-W., v126 (SP319), v310 (MP326, MP328), v311 (MP331)  
 Kanno, Y., v347 (MP440)  
 Kantachuvesiri, S., v252 (MP156)  
 Kantarci, G., v229 (MP086)  
 Kany, S., v54 (SP104)  
 Khao Man, N., v137 (SP350)  
 Kaperonis, N., v126 (SP317)  
 Kappas, A.M., v145 (SP377)  
 Kappelmayer, J., v50 (SP093)  
 Kara, B., v317 (MP351)  
 Kara, I.H., v24 (SP013)  
 Kara, O.D., v346 (MP439)  
 Kara, T., v60 (SP123)  
 Karadayi, H., v229 (MP086)  
 Karakayali, H., v179 (SP481)  
 Karakullukcu, F., v254 (MP162)  
 Karamohamad, F., v96 (SP230)  
 Karanyi, Z., v326 (MP378)  
 Karatan, O., v8 (SO14), v62 (SP129)  
 Karatas, G.U., v15 (SO34), v311 (MP330), v312 (MP333), v355 (MP466), v356 (MP468)  
 Karatson, A., v336 (MP406)  
 Karatzas, I.K., v363 (MP488)  
 Karayalcin, B., v349 (MP447)  
 Karayaylali, I., v349 (MP447)  
 Karet, F.E., v22 (SP008)  
 Karie, S., v280 (MP238)  
 Karkavelas, G., v265 (MP194)  
 Karkoszka, H., v170 (SP453)  
 Karpati, I., v109 (SP271), v325 (MP376), v326 (MP378)  
 Kasap, B., v227 (MP077, MP078)  
 Kassimatis, T.I., v16 (SO38)  
 Kästenbauer, T., v243 (MP129)  
 Kasugai, M., v316 (MP347)  
 Katerina, S., v177 (SP474)  
 Kato, M., v91 (SP214)  
 Kato, S., v78 (SP177)  
 Katopodis, K., v31 (SP035), v349 (MP447)  
 Katopodis, K.P., v115 (SP287), v145 (SP377), v260 (MP180), v301 (MP301)  
 Katus, H.A., v292 (MP274)  
 Kaukov, I.G., v70 (SP153)  
 Kavukcu, S., v38 (SP056), v227 (MP077, MP078)  
 Kawabata, K., v332 (MP395)  
 Kawahara, K., v91 (SP214), v353 (MP459)  
 Kawamura, N., v170 (SP454), v316 (MP347)  
 Kawashima, S., v91 (SP214), v353 (MP459)  
 Kawata, T., v205 (MP009)  
 Kawecka-Jaszcz, K., v309 (MP325)  
 Kaya, A., v212 (MP029, MP030)  
 Kayatas, M., v315 (MP344)  
 Kaynak-Aksoy, P., v355 (MP465)  
 Kazdal, H., v249 (MP148)  
 Kazderova, M., v130 (SP332)  
 Kearns, J., v169 (SP452)  
 Kedziarska, K., v73 (SP162), v182 (SP490)  
 Kee Bang, B., v53 (SP100), v113 (SP283), v144 (SP374), v148 (SP386), v235 (MP106)  
 Keen, M., v268 (MP204)  
 Kelemen, J.Zs., v40 (SP063)  
 Kelesidis, A., v31 (SP035), v274 (MP219)  
 Keller, F., v55 (SP108), v228 (MP082)  
 Keller, T., v193 (MO18)  
 Kemper, M.J., v224 (MP070)  
 Kendrick, D., v242 (MP128)  
 Keogh, K.A., v187 (MO02)  
 Kerjaschki, D., v15 (SO36), v211 (MP027)  
 Kerwin, B.A., v264 (MP191)  
 Kes, P., v85 (SP196), v120 (SP301)  
 Keskinoglu, A., v180 (SP483)  
 Kessler, M., v262 (MP186), v263 (MP190), v338 (MP412)  
 Kettler, M., v13 (SO29), v16 (SO37), v105 (SP257), v188 (MO05)  
 Keune, N., v10 (SO20)  
 Keusch, G., v122 (SP306)  
 Keven, K., v45 (SP078), v74 (SP165), v361 (MP484)  
 Khalilzadeh, E., v324 (MP373)  
 Khalilzaheh, M.R., v127 (SP320)  
 Khamesan, B., v279 (MP235)  
 Khasabov, N.N., v275 (MP223)  
 Khatami, M., v307 (MP318)  
 Kheder, A., v285 (MP253)  
 Khrustaleva, E.V., v134 (SP341)  
 Ki Kim, D., v126 (SP319)  
 Kiaii, M., v140 (SP360)  
 Kihara, T., v126 (SP318), v351 (MP454)  
 Kil Park, S., v234 (MP101)  
 Kilcullen, P., v191 (MO14)  
 Kilicoglu, G., v182 (SP491)  
 Kilis-Pstrusinska, K., v127 (SP323)  
 Kim, C., v348 (MP443)  
 Kim, D.-H., v343 (MP429)  
 Kim, H.-J., v237 (MP111), v374 (TO10)  
 Kim, H., v104 (SP255)  
 Kim, J., v153 (SP401)  
 Kim, M.-J., v134 (SP342), v298 (MP292)  
 Kim, S.-G., v374 (TO10)  
 Kim, S.-H., v331 (MP393)  
 Kim, S.-J., v92 (SP216), v146 (SP378), v323 (MP368)  
 Kim, S., v222 (MP061), v284 (MP248)  
 Kim, T., v348 (MP443)  
 Kim, W., v30 (SP034)  
 Kimak, E., v77 (SP173)  
 Kimura, T., v91 (SP214)  
 Kinikli, G., v219 (MP054)  
 Kinukawa, T., v170 (SP454)  
 Kiperova, B.B., v224 (MP069)  
 Kiperova, B.N., v286 (MP257)  
 Kirazli, S., v191 (MO12)  
 Kirchgessner, J., v114 (SP285)  
 Kirkland, G., v254 (MP164)  
 Kirkpantur, A., v191 (MO12), v305 (MP311)  
 Kirmizis, D., v30 (SP033), v77 (SP174), v110 (SP272), v111 (SP277)  
 Kishi, N., v102 (SP248)  
 Kiss, C., v50 (SP093)  
 Kiss, E., v100 (SP241)  
 Kiss, N., v109 (SP271)  
 Kita, T., v228 (MP080)  
 Kitamura, T., v215 (MP040)  
 Klaassen, I., v224 (MP070)  
 Klassen, P., v103 (SP253), v197 (MO30)  
 Klebe, B., v66 (SP142)  
 Kleinert, J., v10 (SO20)  
 Kleinoeder, T., v122 (SP306)  
 Kliem, V., v253 (MP160)

- Klimeczek, P., v309 (MP325)  
 Klimek, D., v344 (MP431)  
 Klingbeil, A.U., v69 (SP149)  
 Klingler, M., v149 (SP388), v156 (SP410),  
 v159 (SP420), v179 (SP480)  
 Klinkmann, H., v85 (SP197)  
 Klocheva, E.G., v316 (MP346)  
 Klosowska, D., v156 (SP411)  
 Klouche, K., v112 (SP279)  
 Knabbe, C., v353 (MP458)  
 Knaup, K., v16 (SO39)  
 Knepper, M.A., v37 (SP053)  
 Knoll, A., v246 (MP139)  
 Knutsen, K., v283 (MP246)  
 Kobayashi, H., v9 (SO17), v112 (SP278),  
 v198 (MO33), v292 (MP273), v375 (TO13)  
 Kobayashi, S., v102 (SP249), v107 (SP264)  
 Koc, M., v35 (SP047), v229 (MP085),  
 v352 (MP457), v357 (MP471)  
 Kocak, H., v15 (SO34), v311 (MP330),  
 v312 (MP333), v355 (MP466),  
 v356 (MP468)  
 Kocak, S., v229 (MP085)  
 Koch, C., v178 (SP478), v181 (SP488)  
 Kocsis, B., v267 (MP200)  
 Koepsell, H., v23 (SP010)  
 Kohori, F., v118 (SP296)  
 Kohoutova, M., v248 (MP144)  
 Kohsoltani, Y., v44 (SP073)  
 Kokalj Vokac, N., v295 (MP283)  
 Kokkolou, E., v152 (SP399)  
 Kokkona, A., v116 (SP291), v119 (SP299),  
 v289 (MP266), v290 (MP268)  
 Koksal, C., v313 (MP336)  
 Kolagasi, O., v277 (MP228)  
 Kolioussi, E., v145 (SP377)  
 Kolleganova, N., v37 (SP054)  
 Koloniaris, A., v57 (SP114), v241 (MP123)  
 Kolonko, A., v344 (MP431)  
 Kolovou, K., v57 (SP114), v241 (MP123)  
 Kolský, A., v220 (MP056)  
 Komandenko, M.S., v316 (MP346)  
 Komers, R., v34 (SP044)  
 Komissarov, K.S., v108 (SP268)  
 Konda, R., v20 (SP002)  
 Kondakov, I.K., v236 (MP107)  
 Kong, C., v120 (SP300)  
 Koni, I., v242 (MP126)  
 Konieczynska, M., v309 (MP325)  
 Konoshita, T., v242 (MP126)  
 Konuksal, C., v254 (MP162)  
 Koo, J.-R., v374 (TO10)  
 Koo, Y.-S., v53 (SP102)  
 Koo Lee, S., v234 (MP101), v274 (MP221)  
 Koorman, J., v334 (MP401)  
 Kopec, J., v135 (SP345)  
 Koppelstaetter, C., v159 (SP419)  
 Korbi, L.M., v162 (SP430)  
 Korczak-Kowalska, G., v156 (SP411)  
 Kordinas, V., v290 (MP267), v315 (MP343)  
 Korecka, A., v156 (SP411)  
 Korevaar, J.C., v302 (MP304)  
 Korkmaz, A., v212 (MP029, MP030)  
 Koroglu, G., v139 (SP356)  
 Koroshi, A., v56 (SP111), v256 (MP168)  
 Korzets, A., v68 (SP148)  
 Koscielska-Kasprzak, K., v179 (SP480)  
 Köse, K., v110 (SP273), v130 (SP330)  
 Koshikawa, S., v256 (MP169, MP170)  
 Koskinas, A., v238 (MP114)  
 Kosmaczewska, A., v159 (SP420)  
 Kosmadakis, G., v43 (SP072)  
 Kostimpa, I., v238 (MP114)  
 Kostro, I., v62 (SP130), v210 (MP022)  
 Koszegi, T., v267 (MP200)  
 Kotenko, O.N., v173 (SP464)  
 Kotsianis, A., v57 (SP114), v241 (MP123)  
 Kotulevich, N.J., v328 (MP385)  
 Kotwal, A., v178 (SP479)  
 Kotzadamis, N., v274 (MP219)  
 Kouidi, E.J., v314 (MP338)  
 Koukoulaki, M., v177 (SP476)  
 Koulouridis, E., v238 (MP114)  
 Koulouridis, I., v238 (MP114)  
 Koumoundourou, D., v16 (SO38)  
 Koupepidou, P., v55 (SP107), v56 (SP110)  
 Kourakos, M., v116 (SP291)  
 Koureta, P., v57 (SP114), v241 (MP123)  
 Koutala, K.G., v363 (MP488)  
 Koutoupa, E., v111 (SP277)  
 Koutroulia, E., v228 (MP083)  
 Koutsia, Ch., v119 (SP299), v289 (MP266)  
 Kovalchuk, O., v320 (MP358)  
 Kowalczyk-Michalek, M., v303 (MP307),  
 v305 (MP312)  
 Koyama, A., v27 (SP022), v276 (MP225)  
 Koyun, M., v249 (MP148)  
 Kozak, O., v168 (SP448)  
 Koziol, L., v344 (MP430)  
 Kozlovskaya, L.V., v27 (SP024)  
 Kozlovskaya, N.L., v281 (MP242)  
 Kozlowski, M., v76 (SP170)  
 Kraemer, B.K., v21 (SP006)  
 Krajewska, M., v149 (SP388)  
 Kralova, H., v297 (#)  
 Kramar, R., v159 (SP419), v243 (MP129)  
 Krasinska, B., v58 (SP116)  
 Krasinski, Z., v58 (SP116)  
 Krasniak, A., v270 (MP208), v303 (MP307),  
 v305 (MP312), v309 (MP325)  
 Krasnicova, M., v135 (SP345)  
 Krasteva, R.L., v224 (MP069)  
 Krawczyk, R., v149 (SP388)  
 Krawczyk, S., v315 (MP342)  
 Krediet, R.T., v200 (MO37), v302 (MP304),  
 v303 (MP305), v373 (TO07)  
 Kretzler, M., v29 (SP029), v371 (TO01)  
 Krier, J.D., v65 (SP140)  
 Krieter, D.H., v335 (MP404)  
 Krishnan, M., v268 (MP204)  
 Krisper, P., v25 (SP018), v117 (SP292),  
 v372 (TO04)  
 Kristensen, O., v128 (SP326)  
 Krivosikova, Z., v87 (SP203)  
 Krizova, J., v134 (SP344)  
 Kroeger, P., v15 (SO35)  
 Krokida, A., v238 (MP114)  
 Krol, E., v60 (SP123)  
 Kronenberg, F., v243 (MP129)  
 Krüger, T., v16 (SO37)  
 Krumme, B., v193 (MO18)  
 Krupa, D., v71 (SP156)  
 Ksiazek, A., v77 (SP173), v315 (MP342)  
 Ksiazek, P., v235 (MP103), v257 (MP172)  
 Kubiak, A., v216 (MP044), v227 (MP079)  
 Kubota, M., v256 (MP169)  
 Kuch, C., v326 (MP377)  
 Kucher, A.G., v70 (SP153)  
 Kuczera, P., v193 (MO17)  
 Kuehne, S., v122 (SP306)  
 Kuhlmann, M.K., v113 (SP281)  
 Kuhlmann, U., v323 (MP367), v353 (MP458)  
 Kuhr, N., v230 (MP089), v303 (MP306)  
 Kulkarni, H.K., v279 (MP236)  
 Kult, J., v115 (SP288)  
 Kumar, J., v223 (MP066)  
 Kumasaka, R., v254 (MP163)  
 Kundak, A., v227 (MP077)  
 Kuno, T., v129 (SP327)  
 Kunter, U., v8 (SO15), v29 (SP029)  
 Kunz-Watermeyer, G., v115 (SP288)  
 Kuo, K.-T., v58 (SP115)  
 Kuo, M.-C., v315 (MP341)  
 Kuo, T.-S., v79 (SP180)  
 Kuragano, T., v129 (SP327)  
 Kurdoglu, S., v324 (MP370)  
 Kurek, A., v282 (MP243)  
 Kurganovich, S.A., v108 (SP268)  
 Kuriata-Kordek, M., v156 (SP410)  
 Kurnatowska, I., v81 (SP186), v121 (SP305)  
 Kurnatowski, P., v121 (SP305)  
 Kurokawa, K., v326 (MP379)  
 Kuroki, A., v318 (MP353)  
 Kurowska, M., v241 (MP122)  
 Kurowski, R., v76 (SP170)  
 Kuryata, O.V., v198 (MO31), v293 (MP276)  
 Kushimoto, H., v170 (SP454), v214 (MP035),  
 v316 (MP347)  
 Kushlinsky, N.E., v86 (SP198)  
 Kushnir, V., v79 (SP178)  
 Kushnir, V.V., v281 (MP242)  
 Kushnirenko, S.V., v240 (MP119)  
 Kusnierczyk, P., v159 (SP420)  
 Kusztal, M., v149 (SP388), v159 (SP420)  
 Kutlay, S., v74 (SP165), v219 (MP054),  
 v291 (MP270)  
 Kutlucan, A., v49 (SP090)  
 Kutsenko, N.V., v338 (MP413)  
 Kutyrina, I., v79 (SP178)  
 Kutyrina, I.M., v72 (SP159), v219 (#)  
 Kuypers, D., v335 (MP403), v372 (TO03)  
 Kuypers, D.R.J., v13 (SO30), v14 (SO31)  
 Kwang Park, S., v30 (SP034)  
 Kwon Ma, S., v35 (SP048)  
 Kyew Kang, S., v30 (SP034)  
 Kyoung Lee, Y., v35 (SP048)  
 Kyrikidou, P., v354 (MP461)  
 Kyriklidou, P., v346 (MP438)  
 Kyritsis, I., v315 (MP343)  
 Kyu Oh, Y., v236 (MP109)  
 Kyun Shin, S., v126 (SP319)  
 Kyung Chung, W., v46 (SP081)  
 Kyung Sun, B., v53 (SP100)

## L

- La Milia, V., v200 (MO38)  
 LaBrecque, J., v268 (MP204)  
 Lacey, D.L., v196 (MO26)  
 Lachmanová, J., v151 (SP395)  
 Lacueva, J., v272 (MP213)  
 Laczby, B., v267 (MP200), v306 (MP316)  
 Ladányi, E., v235 (MP104)  
 Ladanyi, E., v336 (MP406)  
 Lage, C., v353 (MP458)  
 Lai, Y.-H., v58 (SP115), v67 (SP143),  
 v209 (MP021), v315 (MP341)  
 Laleman, W., v335 (MP403), v372 (TO03)  
 Lalvani, A., v180 (SP484)  
 Lamb, E., v337 (MP411)  
 Lamberti, C., v302 (MP302)  
 Lambie, S.H., v222 (MP062)  
 Lambo, R., v203 (MP002)

- Lambooy, B., v150 (SP390)  
 Lambrecht, F.Y., v38 (SP056)  
 Lameire, N., v45 (#), v46 (#), v218 (MP048),  
 v293 (MP277), v294 (MP278),  
 v314 (MP339), v342 (MP426)  
 Landais, P., v212 (MP031), v262 (MP186),  
 v339 (MP417)  
 Lang, D., v23 (SP010)  
 Lang, F., v42 (SP068), v107 (SP265)  
 Lang, R., v42 (SP069)  
 Langenberg, C., v54 (SP103)  
 Laouad, I., v161 (SP428)  
 Larijani, B., v81 (SP185)  
 Larti, A., v172 (SP459)  
 Lataro, R.C., v108 (SP266)  
 Launay-Vacher, V., v280 (MP238)  
 Laureti, A., v281 (MP240)  
 Lauria, F., v204 (MP005)  
 Lauzurica, R., v364 (MP491)  
 Lavayssière, L., v45 (SP076), v64 (SP137),  
 v164 (SP435)  
 Lavilla, J., v273 (MP218)  
 Laville, M., v61 (SP125)  
 Lavre, J., v267 (MP199)  
 Lawler, J., v236 (MP108)  
 Lazaris, A.C., v16 (SO38)  
 Lazzarich, E., v356 (MP467)  
 Le Bihan, C., v339 (MP417)  
 Le Coz, S., v61 (SP127)  
 Le Mignot, L., v212 (MP031), v339 (MP417)  
 Lecian, D., v34 (SP044)  
 Lecic, N., v132 (SP337)  
 Lee, E.-Y., v331 (MP393)  
 Lee, H.-K., v53 (SP102), v284 (MP249)  
 Lee, J., v35 (SP048)  
 Lee, K.-U., v234 (MP101)  
 Lee, K.-W., v53 (SP102)  
 Lee, S.-J., v284 (MP249)  
 Lee, S., v30 (SP034), v348 (MP443)  
 Lee, Y.-K., v374 (TO10)  
 Lee, Y.-M., v53 (SP102), v284 (MP249)  
 Legakis, N., v177 (SP476)  
 Legallais, C., v335 (MP404)  
 Legendre, C., v165 (SP439)  
 Legrand, A., v46 (SP079)  
 Lehmann, G., v81 (SP187), v82 (SP189)  
 Leikis, M.J., v53 (SP101)  
 Leite Moreira, A., v213 (MP034)  
 Leite-Moreira, A., v34 (SP045), v42 (SP067)  
 Leivestad, T., v199 (MO34)  
 Lekovski, L., v183 (SP493), v184 (SP496)  
 Lema, G.E., v41 (SP065)  
 Lemahieu, W.P.D., v163 (SP432)  
 Lemke, H.-D., v335 (MP404)  
 Lens, X., v245 (MP136)  
 Lenz, T., v6 (SO09)  
 Leogrande, D., v155 (SP408), v359 (MP478)  
 León, C., v234 (MP102)  
 Leonard, E.F., v113 (SP281)  
 Leonardi, G., v365 (MP494)  
 Leonardis, D., v306 (MP315)  
 Leontsini, M., v30 (SP033)  
 Leray, H., v136 (SP349)  
 Lerman, L.O., v40 (SP062), v65 (SP140)  
 Lerut, E., v14 (SO31)  
 Lessan\_Pezeshki, M., v81 (SP185),  
 v307 (MP318)  
 Levendoglu, F., v325 (MP374)  
 Levi, R., v24 (SP014)  
 Levin, A., v140 (SP360), v329 (MP386)  
 Levin, N.W., v113 (SP281)  
 Levin, R., v243 (MP130)  
 Lewandowska-Stachowiak, M., v127 (SP321)  
 Lewinski, A., v81 (SP186)  
 Lewis, D., v142 (SP364), v145 (#),  
 v148 (SP384)  
 Lezaic, V., v364 (MP492)  
 Lezaic, V.D., v253 (MP159)  
 Li, K., v203 (MP001)  
 Li, W., v54 (SP103)  
 Liano, F., v286 (MP255)  
 Liberek, K., v352 (MP455)  
 Liberek, T., v352 (MP455)  
 Libetta, C., v109 (SP269), v341 (MP423),  
 v351 (MP453)  
 Lichinitser, M.R., v86 (SP198)  
 Lieberthal, W., v265 (#)  
 Liebetrau, K., v54 (SP105)  
 Lien, B., v365 (MP496)  
 Ligtner, G., v74 (SP164)  
 Lin, C.-C., v141 (SP362), v294 (MP281)  
 Lin, S.-H., v244 (MP133), v246 (MP138),  
 v345 (MP434)  
 Lin, Y.-F., v215 (MP039), v244 (MP133),  
 v345 (MP434)  
 Lindholm, B., v78 (SP177), v83 (SP192),  
 v84 (SP193), v99 (SP237), v130 (SP331),  
 v137 (SP351), v309 (MP324),  
 v312 (MP332), v353 (MP460)  
 Lindley, E., v123 (SP309)  
 Lindsay, T., v282 (MP245)  
 Linkeschova, R., v327 (MP381)  
 Lins, R.L., v6 (SO11), v44 (SP074)  
 Lipkin, G., v50 (SP091)  
 Lison, A.E., v253 (MP160)  
 Litwin, M., v210 (MP022)  
 Liu, D., v28 (SP025), v74 (SP166)  
 Liu, N., v228 (MP080)  
 Liu, Q., v23 (SP012)  
 Liu, S.-H., v106 (SP259)  
 Liu, Z., v143 (SP370)  
 Lizakowski, S., v101 (SP245)  
 Llamas, F., v144 (SP372)  
 Lloberas, N., v20 (SP003), v157 (SP415),  
 v194 (MO22)  
 Lloveras, J., v375 (TO12)  
 Lobão, R.R.S., v189 (MO08)  
 Lobato, L., v247 (MP140)  
 Lobbedez, T., v13 (SO28)  
 Locatelli, F., v5 (SO08), v200 (MO38),  
 v260 (MP181), v261 (MP183)  
 Locsey, L., v360 (MP481)  
 Loffing, J., v3 (SO02), v199 (MO36)  
 Loghman-Adham, M., v269 (MP206)  
 Loh, M., v376 (TO15)  
 Lombardo, F., v4 (SO05)  
 Lomonte, C., v88 (SP206), v150 (SP392)  
 Lonati, S., v272 (MP214)  
 London, G., v18 (SO42), v299 (MP294)  
 Lonjedo, E., v154 (SP404)  
 Loos, A., v240 (#)  
 Loos-Ayav, C., v338 (MP412)  
 Lopatka, P., v58 (SP116)  
 Lopez, E., v144 (SP372)  
 Lopez, I., v25 (SP017)  
 López, O., v244 (MP132)  
 Lopez, T., v116 (SP290), v302 (MP303)  
 Lopez-Alba, A., v237 (MP112)  
 López-Barea, F., v343 (MP427)  
 López-Farré, A., v39 (SP060), v40 (SP061)  
 Lopez-Gomez, J.M., v90 (SP211),  
 v264 (MP193)  
 Lopez-Hoyos, M., v359 (MP477)  
 Lopez-Menchero, R., v106 (SP260, SP261)  
 Lopez-Ongil, S., v206 (MP011)  
 Lopot, F., v145 (SP375)  
 Lorenzin, D., v358 (MP474)  
 Lorenzo, I., v144 (SP372)  
 Losi, M., v180 (SP484)  
 Losurdo, N., v150 (SP392)  
 Lou Wratten, M., v334 (MP400)  
 Louis Renaux, J., v334 (MP400)  
 Louzada, R.A.P., v144 (SP373)  
 Lovcic, V., v289 (MP264)  
 Loverre, A., v4 (SO04), v158 (SP416),  
 v218 (MP050)  
 Lu, K.-C., v79 (SP180)  
 Lubomirova, M.D., v224 (MP069)  
 Lucas, C.C., v154 (SP405)  
 Lucchi, L., v180 (SP484), v274 (MP220)  
 Lucena, R.M., v320 (MP360)  
 Luciani, V., v136 (SP347)  
 Ludwig, K., v224 (MP070)  
 Ludwig, T., v23 (SP010)  
 Luft, F.C., v22 (SP009), v42 (SP069)  
 Luigi Adani, G., v358 (MP474)  
 Luigi Bedani, P., v155 (SP409)  
 Luisa, D., v177 (SP477)  
 Luisa Aguera Morales, M., v261 (MP185)  
 Luisa Amoedo, M., v86 (SP200)  
 Luisa Diez-Marques, M., v206 (MP012)  
 Luisa Valente, M., v365 (MP494)  
 Lundahl, J., v215 (MP041)  
 Lunghi, P., v30 (SP032)  
 Luno, J., v17 (SO40), v79 (SP179),  
 v133 (SP339)  
 Lusenti, T., v103 (SP250)  
 Luszczek, W., v159 (SP420)  
 Lyubimova, N.V., v86 (SP198)
- ## M
- Maass, J., v251 (MP152)  
 Macaya, C., v39 (SP060), v40 (SP061)  
 Maccarrone, M., v129 (SP329)  
 MacDougall, I., v271 (MP211)  
 MacDougall, I.C., v261 (MP185),  
 v266 (MP197), v275 (MP222)  
 Maceira, B., v237 (MP112)  
 Machado, D., v12 (SO27)  
 Macia, M., v322 (MP366)  
 MacKinnon, B., v225 (MP073)  
 MacLeod, A.M., v336 (MP408),  
 v338 (MP414)  
 MacMillan, J., v254 (MP164)  
 MacRae, J.M., v140 (SP360)  
 Mácsai, E., v235 (MP104)  
 Madani, A., v64 (SP136), v232 (MP095)  
 Madeley, R., v242 (MP128)  
 Madsen, S., v3 (SO01)  
 Maduell, F., v84 (SP194)  
 Madziarska, K., v149 (SP388)  
 Maekawa, K., v103 (SP252)  
 Maeno, Y., v103 (SP252)  
 Maes, B., v3 (SO01), v13 (SO30),  
 v335 (MP403), v372 (TO03)  
 Maes, B.D., v163 (SP432)  
 Maesato, K., v102 (SP249), v107 (SP264)  
 Magaldi, A.J., v21 (SP005), v213 (MP033)  
 Maggio, M., v203 (MP003), v210 (MP023)  
 Magham, S., v45 (#), v46 (#)  
 Maglione, W., v31 (SP037)  
 Maglionico, G., v110 (SP274), v293 (MP275)

- Magott-Procelewska, M., v159 (SP420)  
 Magrassi, A., v208 (MP016)  
 Mah, J.T.L., v376 (TO15)  
 Mahajan, S., v360 (MP480)  
 Mahdavi\_Mazdeh, M., v307 (MP318)  
 Mahmoud, I.A., v222 (MP063)  
 Mahsereci, E., v311 (MP330), v312 (MP333), v356 (MP468)  
 Maier, A., v96 (SP230)  
 Maio, R., v38 (SP057)  
 Maiorano, A., v4 (SO04), v160 (SP423), v163 (SP433)  
 Maitra, S., v350 (MP449)  
 Maixnerova, D., v72 (SP160), v248 (MP144)  
 Majdan, M.G., v77 (SP173), v241 (MP122)  
 Major, L., v138 (SP354), v336 (MP406)  
 Majstorovic, I.J., v216 (MP043)  
 Makedou, A., v128 (SP325)  
 Makhdoomi, K., v167 (SP445)  
 Makino, H., v126 (SP318), v351 (MP454)  
 Makino, Y., v242 (MP126)  
 Maksic, D., v216 (MP043)  
 Malaponte, G., v289 (MP265)  
 Malavaud, B., v358 (MP473)  
 Malberti, F., v75 (SP169)  
 Malbrain, M., v6 (SO11), v44 (SP074)  
 Malgieri, G., v220 (MP055), v230 (MP087), v234 (MP100)  
 Mallamaci, F., v75 (SP169), v174 (SP465), v295 (MP284), v301 (MP300), v306 (MP314, MP315)  
 Mallat, Z., v18 (SO42), v299 (MP294)  
 Malonne, H., v259 (MP178)  
 Malovrh, M., v114 (SP286), v142 (SP365), v276 (MP224)  
 Maltcev, E., v294 (MP279)  
 Malvezzi, P.M., v28 (SP027), v317 (MP348)  
 Mambelli, E., v47 (SP085), v48 (SP086), v328 (MP383)  
 Mamtara, H., v193 (MO19)  
 Manakou, M., v116 (SP291)  
 Manca-di-Villahermosa, S., v129 (SP329), v298 (MP290)  
 Manca-Rizza, G., v28 (SP028), v75 (SP167), v162 (SP431), v191 (MO13)  
 Mancini, E., v47 (SP085), v48 (SP086), v288 (MP263), v328 (MP383)  
 Mancini, V., v203 (MP002), v214 (MP037)  
 Mandarin-de-Lacerda, C.A., v247 (MP142)  
 Mandolfo, S., v329 (MP387)  
 Mandyla, M., v238 (MP114)  
 Manez, R., v344 (MP432)  
 Manga Sahin, G., v229 (MP086)  
 Mangana, P.A., v363 (MP488, MP489)  
 Mangione, F., v197 (MO29)  
 Mangos, G., v254 (MP164)  
 Manitiuss, J., v76 (SP170)  
 Mankowska, A., v315 (MP342)  
 Mann, J., v263 (MP190)  
 Manni, M., v105 (SP256)  
 Manning, A., v5 (SO08)  
 Manno, C., v218 (MP050), v229 (MP084)  
 Mano, T., v94 (SP224)  
 Manou, E., v346 (MP438), v354 (MP461)  
 Manoukian, R., v196 (MO26)  
 Mansoor, M.A., v128 (SP326)  
 Mansour, J., v101 (SP244)  
 Mansouri, M., v10 (SO22)  
 Mansur, M.A., v269 (MP207)  
 Mantella, D., v105 (SP256)  
 Mantha, M., v254 (MP164)  
 Mantuano, E., v28 (SP028), v75 (SP167), v162 (SP431), v288 (MP262)  
 Manuel, A., v270 (MP209)  
 Manuel, B., v285 (MP251)  
 Manuel, F., v362 (MP486)  
 Maouad, B., v100 (SP242)  
 Marangi, A.L., v116 (SP290)  
 Marangoni, F., v365 (MP494)  
 Marasa, M., v210 (MP023), v317 (MP348)  
 Marbury, T., v255 (MP166)  
 Marcas, L., v256 (MP167)  
 Marcelli, D., v114 (SP285), v147 (SP383), v187 (MO01), v259 (MP179), v269 (MP205), v302 (MP302), v307 (MP319)  
 Marcen, R., v169 (SP451), v367 (MP502)  
 Marchio, G., v150 (SP392)  
 Marciniak, M., v348 (MP444)  
 Marco, D., v375 (TO12)  
 Marco Ghiggeri, G., v192 (MO16), v245 (MP135)  
 Marcovici, A., v253 (MP158)  
 Marcucci, R., v172 (SP459)  
 Marcuccio, C., v251 (MP152), v336 (MP407)  
 Marend, N., v36 (SP049), v172 (SP461)  
 Mareckova, H., v233 (MP099)  
 Mareckova, O., v70 (SP152)  
 Marescau, B., v114 (SP284)  
 Margalith, M., v253 (MP158)  
 Maria, R., v42 (SP068)  
 Maria Balletta, M., v234 (MP100)  
 Maria Campistol, J., v97 (SP233)  
 Maria Fagugli, R., v300 (MP297)  
 Maria Ratsch, I., v245 (MP135)  
 Maria Terone, V., v106 (SP262)  
 Mariani, G., v288 (MP262)  
 Marinelli, G., v307 (MP319)  
 Maringhini, S., v342 (MP425)  
 Marinkovic, J., v253 (MP159)  
 Marino, C., v174 (SP466)  
 Marioli, S.I., v343 (MP428)  
 Mark, P.B., v299 (MP293)  
 Markaki, P., v57 (SP114), v241 (MP123)  
 Markmann, J., v169 (SP452)  
 Marko, L., v306 (MP316)  
 Markovic, N., v297 (MP287)  
 Markovic, N.S., v300 (MP298)  
 Markovici, A., v117 (SP293)  
 Marques, L.P.J., v308 (MP322)  
 Marques, M., v39 (SP060), v40 (SP061)  
 Marrone, D., v147 (SP381), v198 (MO32)  
 Marsh, J., v266 (MP197)  
 Marta, K., v177 (SP474)  
 Martin, D., v24 (SP014), v105 (SP257), v196 (MO26), v204 (MP004)  
 Martin, F., v143 (SP368)  
 Martin, H., v122 (SP306)  
 Martin, K., v89 (SP208)  
 Martin, P., v308 (MP323)  
 Martın del Campo, F., v202 (MO42), v349 (MP448), v350 (MP450, MP451)  
 Martin-Garrido, A., v206 (MP012)  
 Martın-Malo, A., v296 (MP285)  
 Martinec, F., v271 (MP212)  
 Martınez, M., v343 (MP427)  
 Martınez, O., v375 (TO12)  
 Martınez, P., v90 (SP211)  
 Martınez Castela, A., v263 (MP190)  
 Martınez-Cercos, R., v143 (SP367)  
 Martınez-Ramırez, H.R., v202 (MO42), v349 (MP448), v350 (MP450, MP451)  
 Martınez-Rodrigo, J., v154 (SP404)  
 Martınez-Vea, A., v256 (MP167)  
 Martinho, A., v154 (SP405)  
 Martini, R., v211 (MP027)  
 Martos Prata, M., v247 (MP141)  
 Martire, V., v141 (SP361)  
 Martorano, C., v306 (MP315)  
 Martul, E.V., v217 (MP045)  
 Marzec, L., v33 (SP043), v352 (MP455)  
 Masin-Spasovska, J., v183 (SP493), v184 (SP496), v376 (TO14)  
 Masiuk, M., v180 (SP482)  
 Massaro, M., v298 (MP290)  
 Massimetti, C., v106 (SP262)  
 Massoglia, A., v203 (MP003), v317 (MP348)  
 Massy, Z., v100 (SP242), v101 (SP244)  
 Masszi, A., v40 (SP064)  
 Mastalerz-Migas, A., v131 (SP334), v132 (SP336), v319 (MP356)  
 Mastalli, D., v346 (MP436)  
 Mastikov, V.E., v134 (SP341)  
 Mat, O.L.M.C., v251 (MP154)  
 Mathavakkannan, S., v120 (SP300)  
 Matias, P., v154 (SP405)  
 Matos, C.M., v247 (MP140)  
 Matsubara, K., v83 (SP192), v84 (SP193), v99 (SP237)  
 Matsuda, M., v228 (MP080)  
 Matsumoto, K., v129 (SP327)  
 Matsumoto, Y., v129 (SP327)  
 Matuszkiewicz-Rowinska, J., v80 (SP184)  
 Matyus, J., v109 (SP271), v325 (MP376)  
 Mauri, J.M., v295 (MP282), v308 (MP320)  
 May, C., v54 (SP103)  
 Mayer, B., v159 (SP419)  
 Mayer, G., v159 (SP419)  
 Mayer, J., v188 (MO05)  
 Mayer, L., v289 (MP264)  
 Mazak, I., v267 (MP200)  
 Maziar, S., v81 (SP185), v307 (MP318)  
 Mazouz, H., v167 (SP444)  
 Mazur, B., v124 (SP313)  
 Mazurenko, S.O., v250 (#)  
 Mazzarino, C.M., v289 (MP265)  
 Mazzucco, G., v10 (SO22)  
 McArdle, F., v211 (MP028), v237 (MP110)  
 McCormick, P.A., v363 (MP490), v367 (MP501)  
 McDonald, M., v10 (SO21)  
 McIntyre, C.W., v69 (SP151), v91 (SP215), v102 (SP247), v119 (SP298), v222 (MP062), v331 (MP394), v340 (MP419, MP420)  
 McIntyre, C.W., v189 (MO07)  
 McKerlie, C., v199 (MO35)  
 McMahan, L.P., v53 (SP101)  
 McNinch, J., v196 (MO26)  
 McQuillan, R., v363 (MP490)  
 Mee Cho, Y., v174 (SP467)  
 Meert, N., v334 (MP401)  
 Mehrsai, A., v161 (SP426), v171 (SP458), v249 (MP147), v364 (MP493)  
 Mehta, A., v248 (MP143)  
 Mehta, S., v323 (MP369)  
 Meier, P., v291 (MP271)  
 Meijers, B., v66 (SP141)  
 Meimaridou, D., v346 (MP438), v354 (MP461)  
 Meirelles, M.S.S., v108 (SP266)  
 Mele, G., v142 (SP366)  
 Mellotte, G., v197 (MO30)

- Melnick, J., v15 (SO35), v89 (SP208)  
 Meloni, F., v351 (MP453)  
 Memmos, D., v30 (SP033), v77 (SP174),  
 v83 (SP191), v349 (MP447)  
 Menarguez, J., v90 (SP211)  
 Mendelssohn, D., v68 (SP146)  
 Mendes, A., v154 (SP405)  
 Mendez, S., v322 (MP366)  
 Menezes, K.U., v108 (SP266), v144 (SP373)  
 Menezes, L.F., v247 (MP142)  
 Mengel, M., v158 (SP418)  
 Menne, J., v176 (SP472)  
 Menneas, P.A., v107 (SP263)  
 Menniti, M., v371 (TO02)  
 Merciaro, G., v316 (MP345)  
 Mercieri, A., v257 (MP173), v372 (TO06)  
 Mereu, M.C., v107 (SP263)  
 Merino, J.L., v169 (SP451), v286 (MP255),  
 v367 (MP502)  
 Merle de Boever, C., v249 (MP146)  
 Merta, M., v72 (SP160), v220 (MP056),  
 v233 (MP099), v248 (MP144)  
 Mertens, P.R., v29 (SP029)  
 Mesic, E., v115 (SP288)  
 Messa, P., v354 (MP462), v359 (MP476)  
 Messari, I.D., v34 (SP046)  
 Messina, M., v4 (SO05), v158 (SP417)  
 Mestrez, F., v251 (MP154)  
 Mesut Titiz, I., v182 (SP491)  
 Metaxaki, P.G., v343 (MP428), v363 (MP488,  
 MP489)  
 Metaxatos, G.J., v127 (SP322)  
 Mete, T., v361 (MP484)  
 Mettang, T., v193 (MO18)  
 Meyer, H.-P., v38 (SP055)  
 Meyer, T.N., v15 (SO36)  
 Mezza, E., v251 (MP152), v285 (MP251)  
 Mezzano, D., v213 (MP032)  
 Michael Lazarus, J., v268 (MP204)  
 Michaeli, N., v68 (SP148)  
 Michail, O.P., v43 (SP072)  
 Michail, S., v43 (SP072)  
 Michalaki, E., v128 (SP325)  
 Michalashvily, L., v117 (SP293)  
 Michalek, M., v309 (MP325)  
 Michalis, L.K., v260 (MP180), v301 (MP301)  
 Michel, U., v253 (MP160)  
 Michele, B., v122 (SP307)  
 Michelson, G., v195 (MO23)  
 Michittu, M.B., v107 (SP263)  
 Micozkadioglu, H., v136 (SP348),  
 v138 (SP355)  
 Micozkadioglu, I., v136 (SP348)  
 Micu, D., v77 (SP175)  
 Middleton, R., v193 (MO19), v287 (MP260)  
 Mierzicki, P., v235 (MP103)  
 Migliori, M., v152 (SP398), v153 (SP402)  
 Mihaljevic, D., v348 (MP446)  
 Miji, M., v204 (MP005)  
 Mikheeva, Y.S., v80 (SP182), v141 (SP363)  
 Miklaszewicz, A., v180 (SP482)  
 Mikros, S., v51 (SP096)  
 Milan, K., v278 (MP231)  
 Milena, F., v234 (MP102)  
 Milenkovic, S., v321 (MP362)  
 Miles, L., v261 (MP185)  
 Millán, I., v86 (SP200), v92 (SP217)  
 Miller, J., v204 (MP004)  
 Miller-Kasprzak, E., v227 (MP079)  
 Millington, K., v180 (SP484)  
 Milstersteiner, D.R., v122 (SP308)  
 Mimran, A., v242 (MP127)  
 Min Lee, S., v278 (MP232)  
 Min Park, J., v221 (MP058, MP059, MP060),  
 v226 (MP074), v231 (MP091),  
 v278 (MP232, MP233)  
 Min Yoo, S., v46 (SP081)  
 Minaguchi, J., v91 (SP214)  
 Minakuchi, J., v353 (MP459)  
 Minevitz, E., v294 (MP279)  
 Mioni, G., v11 (SO23), v358 (MP474)  
 Mir, M., v375 (TO12)  
 Mir, S., v32 (SP038, SP039), v33 (SP042),  
 v180 (SP483), v192 (MO15), v226 (MP076)  
 Miranda, I., v104 (#)  
 Mircescu, G., v267 (MP201), v272 (MP215)  
 Mirengi, F., v166 (SP443)  
 Miric, M., v300 (MP298)  
 Miró, J.M., v339 (MP416)  
 Miroshnichenko, N.G., v281 (MP242)  
 Mirza Onder, A., v150 (SP391)  
 Mirzaee, , v163 (SP434)  
 Miscio, F., v198 (MO32)  
 Mischak, H., v14 (SO33), v20 (SP001),  
 v158 (SP418), v251 (MP153)  
 Misz, M., v336 (MP406)  
 Mitchell, P., v137 (SP352)  
 Mitsopoulos, E., v346 (MP438),  
 v354 (MP461)  
 Mitzner, S.R., v330 (MP388)  
 Miyamori, I., v242 (MP126)  
 Moazed, V., v324 (MP372)  
 Moczulski, D., v235 (MP105)  
 Modesto, A., v166 (SP441)  
 Modi, G.K., v151 (SP396)  
 Moesenthin, M.M., v233 (MP098)  
 Moh Chaaban, A., v162 (SP430)  
 Moh Hamasni, I., v162 (SP430)  
 Mohamed, A., v305 (MP313)  
 Mohamed, B.L., v239 (MP116)  
 Mohseni, P., v64 (SP136), v232 (MP095)  
 Mohteshamzadeh, M., v12 (SO25)  
 Mokrejšová, M., v151 (SP395)  
 Moldovan, R., v13 (SO28)  
 Molero, L., v39 (SP060), v40 (SP061)  
 Molina, A., v73 (SP163)  
 Molina, P., v154 (SP404), v164 (SP437)  
 Molino, D., v153 (SP400)  
 Mollo, A., v29 (SP031), v32 (SP040),  
 v33 (SP041), v210 (MP025)  
 Molnár, G.A., v235 (MP104), v267 (MP200),  
 v306 (MP316)  
 Molnár, M., v138 (SP354), v235 (MP104),  
 v306 (MP316)  
 Mon, C., v73 (SP163)  
 Mondry, A., v376 (TO15)  
 Monegal, A., v6 (SO10)  
 Monge, M., v167 (SP444)  
 Mongelli, A., v237 (MP112)  
 Monhart, A., v68 (SP147)  
 Montagna, F., v208 (MP016)  
 Montagnino, G., v354 (MP462)  
 Montanaro, D., v11 (SO23), v358 (MP474)  
 Montane, B., v150 (SP391)  
 Monteiro, P., v286 (MP258)  
 Montemurno, E., v31 (SP036)  
 Montenegro, J., v262 (MP188)  
 Montestruc, F., v262 (MP186, MP187)  
 Montinaro, V., v218 (MP050)  
 Moon, S.-o., v30 (SP034)  
 Mooraki, A., v45 (#), v46 (#), v176 (SP471),  
 v284 (MP250)  
 Mora, C., v234 (MP102), v239 (MP117)  
 Mora, I., v237 (MP112)  
 Moradi, M., v170 (SP455)  
 Moran, S.V., v41 (SP065)  
 Moreira, P., v247 (MP140)  
 Moreira-Rodrigues, M., v24 (SP015),  
 v42 (SP067)  
 Morellini, V., v356 (MP467)  
 Morena, M., v112 (SP279), v136 (SP349),  
 v298 (MP291)  
 Moreno, A., v322 (MP366), v339 (MP416)  
 Moreno-Baylach, M.J., v360 (MP479)  
 Moreso, F., v71 (SP155), v356 (MP469),  
 v357 (MP470)  
 Morimoto, H., v126 (SP318), v351 (MP454)  
 Moriya, H., v102 (SP249), v107 (SP264)  
 Moroni, G., v31 (SP037)  
 Morosetti, M., v105 (SP256)  
 Morris, A.T., v113 (SP281)  
 Morris, S., v248 (MP145)  
 Morrone, L.F., v216 (MP042)  
 Mortazavi, M., v252 (MP155)  
 Moscarelli, L., v368 (MP503)  
 Moscheni, C., v155 (SP409)  
 Mosquera, J.A., v125 (SP314)  
 Mostoslavsky, M., v117 (SP293),  
 v253 (MP158)  
 Motellon, J.L., v89 (SP209)  
 Motohashi, K., v129 (SP328)  
 Motomura, M., v242 (MP126)  
 Mougnot, B., v211 (MP027)  
 Moutsatsou, P.C., v34 (SP046)  
 Moutzouris, D.-A., v116 (SP291),  
 v119 (SP299), v289 (MP266),  
 v290 (MP268)  
 Moyses, R., v105 (SP258)  
 Moisés, R.M.A., v85 (SP195), v188 (MO04)  
 Moyses, Z.P., v213 (MP033)  
 M'pio, I., v26 (SP019)  
 Muchin, N.A., v27 (SP024)  
 Muksi, I., v68 (SP146)  
 Mueller, B., v183 (SP494)  
 Mueller, V., v330 (MP388)  
 Mueller-Wiefel, D.E., v224 (MP070)  
 Muerdter, T.M., v353 (MP458)  
 Mugnier, C., v339 (MP417)  
 Mukhiya, G.K., v360 (MP480)  
 Muniz-Martinez, M.-C., v251 (MP154)  
 Muñoz, C., v232 (MP094)  
 Munteanu, M., v36 (SP049)  
 Mura, C., v191 (MO13)  
 Murakami, K., v170 (SP454), v214 (MP035),  
 v316 (MP347)  
 Muranaka, Y., v52 (SP098)  
 Murat Atasoyu, E., v47 (SP082),  
 v144 (SP371), v346 (MP437)  
 Muray, S., v86 (SP200), v92 (SP217)  
 Murayama, S., v108 (SP267)  
 Murer, H., v187 (MO03)  
 Murer, L., v245 (MP135)  
 Muros, M., v239 (MP117)  
 Musial, K., v96 (SP229)  
 Muszynska, A., v131 (SP334), v132 (SP336)  
 Mutti, A., v331 (MP391)  
 Myeong Yu, J., v47 (SP083), v294 (MP280)  
 Mylonopoulou, M., v51 (SP096)  
 Myslak, M., v73 (SP162), v168 (SP449),  
 v180 (SP482), v182 (SP490)  
 Mysliwiec, M., v21 (SP004), v28 (SP026),  
 v88 (SP207), v128 (SP324), v319 (MP355),  
 v320 (MP357, MP358), v321 (MP361),  
 v324 (MP371)



Myung Kang, C., v362 (MP487)

## N

Na, K.-R., v53 (SP102), v284 (MP249)  
 Nabeshima, K., v170 (SP454), v214 (MP035),  
 v316 (MP347)  
 Nacher, V., v157 (SP415)  
 Nadri, Q.J.A.W., v162 (SP430)  
 Nafar, M., v163 (SP434), v167 (SP446),  
 v170 (SP455)  
 Naga, S.S., v341 (MP421, MP422)  
 Nagase, S., v276 (MP225)  
 Nagaya, T., v332 (MP395)  
 Nagel, D., v100 (SP243)  
 Nagy, J., v138 (SP354), v235 (MP104),  
 v267 (MP200), v306 (MP316)  
 Naito, T., v208 (MP017)  
 Najafi, I., v45 (#), v46 (#), v284 (MP250)  
 Naji, A., v169 (SP452)  
 Nakagawa, K., v37 (SP054)  
 Nakajima, S., v5 (SO08)  
 Nakamoto, H., v347 (MP440)  
 Nakamura, J., v143 (SP369)  
 Nakamura, M., v76 (SP171), v254 (MP163)  
 Nakamura, N., v254 (MP163)  
 Nakandakari, F.K., v213 (MP033)  
 Nakane, M., v15 (SO35)  
 Nakanishi, A., v265 (#)  
 Nakanishi, T., v129 (SP327)  
 Nakao, K., v126 (SP318), v351 (MP454)  
 Nakayama, Y., v143 (SP369)  
 Nakazawa, R., v129 (SP328)  
 Nakopoulou, L., v16 (SO38)  
 Nampoory, M.N.R., v265 (MP196)  
 Nanni Costa, A., v365 (MP494)  
 Naqvi, S.A.J., v109 (SP270)  
 Naranjo Sanz, J., v120 (SP302)  
 Naretto, C., v10 (SO22)  
 Narkiewicz, K., v60 (SP123)  
 Nascimento, C., v12 (SO27)  
 Nascimento, M.M.P., v144 (SP373)  
 Nasou, G., v166 (SP441)  
 Nassiri, A., v61 (SP125)  
 Naticchia, A., v105 (SP256), v136 (SP347)  
 Naumnik, B., v21 (SP004), v319 (MP355),  
 v320 (MP357, MP358), v321 (MP361)  
 Navaneethan, S., v355 (MP464)  
 Navarro, J., v17 (SO40), v79 (SP179),  
 v234 (MP102), v239 (MP117),  
 v322 (MP366)  
 Navarro, M., v364 (MP491)  
 Naveh-Many, T., v24 (SP014)  
 Nazemi, H., v252 (MP155)  
 Necchi, V., v203 (MP003)  
 Neftel, F., v346 (MP436)  
 Negi, S., v87 (SP202)  
 Negrao, A.P., v12 (SO27)  
 Negri, A.L., v86 (SP199)  
 Nelson, P.J., v371 (TO01)  
 Nergizoglu, G., v8 (SO14), v62 (SP129),  
 v291 (MP270)  
 Neto, M.M., v144 (SP373)  
 Netti, S.G., v218 (MP050)  
 Neumann, K., v38 (SP055)  
 Neumann, K.H., v233 (MP098)  
 Neumayer, H.-H., v3 (SO01)  
 Neumayer, H.H., v195 (MO24)  
 Nevens, F., v335 (MP403), v372 (TO03)  
 Neves, C.L., v85 (SP195)  
 Neves, K.R., v105 (SP258), v188 (MO04)

Nguyen, C., v18 (SO42), v299 (MP294)  
 Nguyen, H.T., v76 (SP172)  
 Nguyen, P., v188 (MO06), v357 (MP472)  
 Nicolaou, C., v290 (MP267), v315 (MP343)  
 Nicosia, V., v166 (SP443)  
 Niemir, Z.I., v216 (MP044), v227 (MP079)  
 Nijenhuis, T., v98 (SP234), v199 (MO36)  
 Nikolopoulos, P., v115 (SP287)  
 Nikolopoulos, P.M., v260 (MP180)  
 Nikolopoulou, N.I., v34 (SP046)  
 Nikolova, M.K., v286 (MP257)  
 Nikopoulos, K., v346 (MP438), v354 (MP461)  
 Ninan, V.T., v265 (MP196)  
 Nishi, S., v316 (MP347)  
 Nishimura, H., v208 (MP017)  
 Nishimura, M., v9 (SO17), v37 (SP052),  
 v112 (SP278), v198 (MO33),  
 v292 (MP273), v375 (TO13)  
 Nishiuchi, T., v91 (SP214)  
 Nishizawa, Y., v103 (SP252), v373 (TO08)  
 Nissenson, A., v143 (SP370), v325 (MP375)  
 Nitsche, A., v371 (TO01)  
 Niutta, E., v110 (SP274), v293 (MP275)  
 Nivet, H., v161 (SP428)  
 Noda, M., v112 (SP280)  
 Nofroni, I., v105 (SP256)  
 Nogueira, S.N., v308 (MP322)  
 Noh, J.-W., v374 (TO10)  
 Nolasco, F., v362 (MP486)  
 Nonclercq, D., v46 (SP079)  
 Nonnast-Daniel, B., v152 (SP397),  
 v178 (SP478), v181 (SP488)  
 Noordzij, M., v302 (MP304)  
 Nordfors, L., v78 (SP177), v130 (SP331),  
 v137 (SP351), v309 (MP324),  
 v312 (MP332)  
 Nosikov, V.V., v72 (SP159), v219 (#), v239 (#)  
 Nourreddine, B., v94 (SP223)  
 Novak, M., v68 (SP146)  
 Novello, M.G., v141 (SP361)  
 Novembrino, C., v272 (MP214)  
 Nowak, A., v216 (MP044)  
 Nowak, I., v159 (SP420)  
 Nowicki, M., v81 (SP186), v121 (SP305),  
 v138 (SP353), v222 (MP064),  
 v224 (MP068), v225 (MP071)  
 Noyan, A., v346 (MP439)  
 Ntasis, G., v126 (SP317)  
 Nube, M.J., v123 (SP311), v124 (SP312)  
 Nurhan Ozdemir, F., v4 (SO06), v149 (SP387),  
 v161 (SP427), v177 (SP475),  
 v209 (MP019), v258 (MP174),  
 v297 (MP289), v300 (MP296),  
 v347 (MP441), v355 (MP465)  
 Nuzzi, F., v220 (MP055), v230 (MP087),  
 v234 (MP100)  
 Nyberg, G., v3 (SO01)  
 Nykula, T.D., v59 (SP120)

## O

O'Donoghue, D., v66 (SP142)  
 O'Riordan, A., v367 (MP501)  
 Obara, M., v276 (MP225)  
 Obara, W., v20 (SP002)  
 Oberbauer, R., v159 (SP419), v165 (SP439)  
 Ocana, J., v367 (MP502)  
 Oda, O., v332 (MP395)  
 Odabas, A.R., v281 (MP241)  
 Odone, P., v366 (MP497)  
 O'Donoghue, D., v65 (SP139)  
 O'Donoghue, D.J., v193 (MO19),  
 v287 (MP260)  
 Odrowaz-Sypniewska, G., v76 (SP170)  
 Oeczan, F., v183 (SP494)  
 Oehmer, S., v195 (MO23)  
 of the ALERT Study Group, B., v3 (SO01)  
 Ofsthun, N., v103 (SP253)  
 Ofsthun, N.J., v268 (MP204)  
 Ogawa, H., v332 (MP395)  
 Ogawa, Y., v80 (SP183)  
 Oguz, Y., v171 (SP457), v212 (MP029,  
 MP030)  
 Oh, D.-J., v343 (MP429)  
 Oh, J.-E., v374 (TO10)  
 Oh, Y., v35 (SP048)  
 Ohtake, T., v102 (SP249), v107 (SP264)  
 Ok, E., v111 (SP276), v168 (SP450),  
 v181 (SP486), v304 (MP309),  
 v312 (MP334), v358 (MP475)  
 Ok Choi, S., v47 (SP083), v294 (MP280)  
 Ok Kim, Y., v53 (SP100), v113 (SP283),  
 v144 (SP374), v148 (SP386)  
 Oka, M., v102 (SP249), v107 (SP264)  
 Okada, H., v347 (MP440)  
 Okada, Y., v205 (MP009)  
 Okamoto, K., v102 (SP249), v107 (SP264)  
 Okasha, K.M., v308 (MP321)  
 Okino, K., v9 (SO17), v112 (SP278),  
 v198 (MO33), v292 (MP273), v375 (TO13)  
 Oko, A., v71 (SP156), v344 (MP430)  
 Oktar, S., v304 (MP308)  
 Oktay Seymen, H., v160 (SP422)  
 Okumura, K., v254 (MP163)  
 Okuno, S., v103 (SP252), v373 (TO08)  
 Olah, A.V., v50 (SP093)  
 Olcay, I., v258 (MP174)  
 Olejniczak, P., v216 (MP044), v227 (MP079)  
 Olga, C., v270 (MP209)  
 Olga, M., v177 (SP474)  
 Oliveira, E.I., v247 (MP141)  
 Oliveras, A., v375 (TO12)  
 Olmedo, F., v278 (MP230)  
 Olmos, A., v194 (MO20)  
 Olsson, A., v3 (SO01)  
 Olsson, S., v231 (MP092)  
 Omidvar, B., v49 (SP088)  
 Onbasi, K., v288 (MP261)  
 Oncevski, A., v154 (SP403)  
 Oner, A., v346 (MP439)  
 Oner, K., v168 (SP448)  
 Onetti Muda, A., v33 (SP041), v232 (MP096)  
 Ono, M., v332 (MP395)  
 Ono, T., v9 (SO17), v37 (SP052),  
 v112 (SP278), v198 (MO33),  
 v228 (MP080), v292 (MP273), v375 (TO13)  
 Onodera, Y., v94 (SP224)  
 Onuchic, L.F., v247 (MP142)  
 Oostvogel, F.G., v373 (TO07)  
 Opatrný, K., v220 (MP056)  
 Opelz, G., v11 (SO24), v160 (SP424)  
 Oppenheimer, F., v97 (SP233)  
 Orea, O.E., v367 (MP502)  
 Oreopoulos, D.G., v349 (MP447)  
 Orfila, A., v375 (TO12)  
 Origlia, V., v198 (MO32)  
 O'Riordan, A., v363 (MP490)  
 Orita, H., v87 (SP202)  
 Orkopoulou, E., v119 (SP299)  
 Ortac, E., v63 (SP132)  
 Ortega, A., v27 (SP023), v206 (MP010)

- Ortega, M., v90 (SP211)  
 Ortega, O., v73 (SP163)  
 Ortiz, M., v73 (SP163)  
 Ortiz, S.C., v247 (MP142)  
 Ortuno, J., v169 (SP451), v286 (MP255),  
 v367 (MP502)  
 Osborne, L., v199 (MO35)  
 Ospanova, T.S., v328 (MP385)  
 Ostalska-Nowicka, D., v222 (MP064)  
 Ostendorf, T., v8 (SO15)  
 Ostman, A., v8 (SO15)  
 Ostrowski, M., v182 (SP490)  
 O'Sullivan, O.E., v205 (MP007)  
 Ota, Y., v332 (MP395)  
 Oteki, T., v276 (MP225)  
 Oter, S., v212 (MP029)  
 Otsubo, O., v80 (SP183)  
 Ott, U., v81 (SP187), v82 (SP189)  
 Ottaviano, G., v289 (MP265)  
 Otto, S., v177 (SP474), v278 (MP231)  
 Ottonello, G., v245 (MP135)  
 Otukesh, H., v167 (SP446), v279 (MP235)  
 Oufroukhi, L., v164 (SP435, SP436)  
 Ouseph, R., v118 (SP295)  
 Outland, J.S., v58 (SP118)  
 Ouzouni, S.G., v314 (MP338)  
 Ozalkaya, E., v192 (MO15)  
 Ozbek, N., v179 (SP481)  
 Özbek, S.S., v358 (MP475)  
 Ozcaakar, Z.Birsin, v60 (SP124)  
 Ozcan, O., v18 (SO43), v171 (SP457)  
 Ozcelik, G., v346 (MP439)  
 Ozdemir, F.N., v131 (SP333, SP335),  
 v136 (SP348), v138 (SP355), v266 (MP198)  
 Ozdemir, H.B., v162 (SP429)  
 Ozdemir, N.F., v162 (SP429)  
 Ozdemir, R., v32 (SP039), v33 (SP042)  
 Ozdogan, M., v59 (SP121)  
 Özen, S., v217 (MP046)  
 Ozener, C., v35 (SP047), v229 (MP085),  
 v349 (MP447), v352 (MP457)  
 Ozgezer, T., v182 (SP491)  
 Özgüç, M., v217 (MP046)  
 Özgurtas, T., v18 (SO43), v171 (SP457)  
 Özkahya, M., v111 (SP276), v168 (SP450)  
 Özkahya, M., v312 (MP334)  
 Ozkan, N., v35 (SP047)  
 Ozkaya, O., v63 (SP132), v220 (MP057)  
 Ozkayin, N., v180 (SP483), v192 (MO15)  
 Ozler, M., v212 (MP030)  
 Ozono, S., v112 (SP280)  
 Özsahin, E., v110 (SP273)  
 Ozturk, M., v61 (SP126)  
 Ozyurt, M., v144 (SP371)
- P**
- Pabisiak, K., v73 (SP162)  
 Pacchiano, G., v187 (MO01), v302 (MP302)  
 Pacheco, G.G.L.C., v308 (MP322)  
 Pacitti, A., v336 (MP407)  
 Packman, S., v10 (SO21)  
 Paczek, L., v156 (SP411), v183 (SP492)  
 Padberg, W., v160 (SP424)  
 Padhi, D., v255 (MP165, MP166)  
 Paear, R., v196 (MO27)  
 Pais, M.J., v154 (SP405)  
 Palade, F., v125 (SP316)  
 Paliyenko, I.A., v59 (SP120)  
 Palla, R., v191 (MO13)  
 Pallardó, L.M., v84 (SP194), v164 (SP437)  
 Pallardo, L.M., v154 (SP404)  
 Palma, M.L., v109 (SP269)  
 Palma, S., v232 (MP094)  
 Palmieri, C., v371 (TO02)  
 Palmieri, D., v356 (MP467)  
 Palmiero, G., v104 (#)  
 Palomar, R., v278 (MP230)  
 Pan, W.-H., v67 (SP143)  
 Panaghiu, L., v125 (SP316)  
 Panagiotou, N., v126 (SP317)  
 Panayotopoulos, C.A., v343 (MP428)  
 Panczyk-Tomaszewska, M., v210 (MP022)  
 Pandolfi, A., v43 (SP071)  
 Pandya, P., v328 (MP384)  
 Pancescu, V., v338 (MP412)  
 Pangalou, M., v110 (SP272), v111 (SP277)  
 Pani, A., v50 (SP092)  
 Paniara, O., v177 (SP476)  
 Panichi, V., v28 (SP028), v75 (SP167),  
 v162 (SP431), v191 (MO13)  
 Pantelias, K., v57 (SP114), v241 (MP123)  
 Pantzaki, A., v30 (SP033)  
 Panuccio, V., v301 (MP300)  
 Paoletti, S., v28 (SP028), v75 (SP167),  
 v162 (SP431), v191 (MO13)  
 Paolo Schena, F., v214 (MP037)  
 Paolo Segoloni, G., v4 (SO05), v158 (SP417)  
 Papachristoforou, K., v62 (SP131),  
 v238 (MP113)  
 Papadakis, G., v51 (SP096)  
 Papadogiannakis, A., v62 (SP131),  
 v238 (MP113)  
 Papadopoulos, R., v274 (MP219)  
 Papadopoulou, D., v346 (MP438),  
 v354 (MP461)  
 Papadopoulou, P., v43 (SP072)  
 Papagalanis, N., v126 (SP317)  
 Papagianni, A., v30 (SP033), v31 (SP035),  
 v77 (SP174), v83 (SP191)  
 Papakonstantinou, S., v274 (MP219)  
 Papalia, T., v205 (MP008)  
 Papos, M., v100 (SP241)  
 Papp, L., v109 (SP271)  
 Pappas, Ch.A., v301 (MP301)  
 Pappas, K.D., v260 (MP180), v301 (MP301)  
 Pappas, M., v152 (SP399), v156 (SP412)  
 Papponetti, M., v316 (MP345)  
 Paragh, G., v325 (MP376), v326 (MP378),  
 v360 (MP481)  
 Parastaeva, M.M., v70 (SP153)  
 Parikova, A., v200 (MO37)  
 Paris, B., v61 (SP127)  
 Parisi, S., v122 (SP307)  
 Park, J., v12 (SO26), v157 (SP414),  
 v274 (MP221), v348 (MP443)  
 Park, K.-H., v284 (MP249)  
 Park, M.S., v310 (MP326)  
 Park, S.-k., v274 (MP221)  
 Park, S.S., v264 (MP191)  
 Parlongo, R.M., v295 (MP284)  
 Parrilla, B., v197 (MO29), v208 (MP016)  
 Partiu, A., v13 (SO28)  
 Parving, H.-H., v14 (SO33)  
 Pasaoglu, H., v111 (SP275), v304 (MP308)  
 Pascoe, M.D., v165 (SP440)  
 Pascual, J., v169 (SP451), v367 (MP502)  
 Pashkov, M.V., v86 (SP198)  
 Pasini, P., v300 (MP297)  
 Pasowicz, M., v303 (MP307), v305 (MP312),  
 v309 (MP325)  
 Pasquali, S., v50 (SP092), v288 (MP263)  
 Pasquariello, A., v218 (MP049)  
 Passadakis, P., v349 (MP447)  
 Passerini, P., v4 (SO05), v359 (MP476)  
 Passlick-Deetjen, J., v336 (MP406)  
 Patel, A., v193 (MO19)  
 Patel, R.K., v268 (MP202)  
 Patole, P.S., v196 (MO27)  
 Patrzalek, D., v156 (SP410), v179 (SP480)  
 Paul, R., v65 (SP139), v282 (MP245)  
 Paul De Deyn, P., v114 (SP284)  
 Paunic, Z., v300 (MP298)  
 Pavone, B., v117 (SP294)  
 Pavone, L., v103 (SP250), v331 (MP391)  
 Pawlaczyk, K., v344 (MP430)  
 Pawlak, D., v28 (SP026), v128 (SP324)  
 Pawlak, K., v21 (SP004), v28 (SP026),  
 v128 (SP324), v319 (MP355),  
 v321 (MP361)  
 Pawliczak, E., v344 (MP430)  
 Paydas, S., v357 (MP471)  
 Pecoits-Filho, R., v276 (MP227)  
 Pecoraro, C., v220 (MP055), v230 (MP087),  
 v234 (MP100), v342 (MP425)  
 Pecovnik Balon, B., v295 (MP283)  
 Pedersen, T., v3 (SO01)  
 Pedreanez, A.B., v125 (SP314)  
 Pedrini, L.A., v257 (MP173), v372 (TO06)  
 Peeters, L., v280 (MP237)  
 Peirano, G., v336 (MP407)  
 Pell, G., v54 (SP103)  
 Pelzl, S., v160 (SP424)  
 Pencak, P., v193 (MO17)  
 Penescu, M., v314 (MP340)  
 Penza, R., v192 (MO16)  
 Peralta, C., v256 (MP167)  
 Perco, P., v159 (SP419)  
 Peregud-Pogorzelski, J., v210 (MP022)  
 Pereira, F.D., v144 (SP373)  
 Pereira, J., v213 (MP032)  
 Perera Chang, M., v18 (SO44)  
 Perez, D.R., v41 (SP065)  
 Perez, J., v144 (SP372)  
 Pérez García, R., v296 (MP285)  
 Perez Oller, R., v245 (MP136)  
 Pérez-Fontán, M., v135 (SP346),  
 v342 (MP424), v344 (MP432)  
 Perez-Garcia, R., v90 (SP211)  
 Perez-Rivero, G., v206 (MP011)  
 Perfumo, F., v342 (MP425)  
 Peritore, D., v365 (MP494)  
 Perniola, A., v116 (SP290)  
 Perrotti, N., v371 (TO02)  
 Perschl, A.M., v41 (SP066)  
 Perticone, F., v38 (SP057)  
 Pertile, E., v296 (MP286)  
 Pertosa, G., v147 (SP381), v198 (MO32),  
 v260 (MP182)  
 Peru, H., v63 (SP132), v220 (MP057)  
 Peruzzi, L., v4 (SO05), v29 (SP031),  
 v32 (SP040), v33 (SP041), v210 (MP025),  
 v245 (MP135)  
 Pessegueiro, P., v121 (SP304), v362 (MP486)  
 Pestana, M., v24 (SP015), v34 (SP045),  
 v42 (SP067)  
 Pestana Vasconcelos, M., v166 (SP442),  
 v213 (MP034)  
 Peteiro, J., v344 (MP432)  
 Peters, A., v335 (MP405)  
 Pethoe, F., v336 (MP406)  
 Petit, J.-L., v26 (SP020)  
 Petitclerc, T., v118 (SP297)

- Petrescu, L., v314 (MP340)  
 Petrie, C.J., v299 (MP293)  
 Petrone, I., v191 (MO13)  
 Petrosillo, N., v121 (SP303)  
 Petru, K., v68 (SP147)  
 Petrucci, M.T., v232 (MP096)  
 Petrusavska, G., v183 (SP493), v184 (SP496)  
 Petruzzelli, V., v214 (MP037)  
 Pezzotti, P., v121 (SP303)  
 Pfaff, H., v326 (MP377)  
 Pfaller, W., v219 (MP052)  
 Pfeiffer, K., v345 (MP433)  
 Philippe Jais, J., v339 (MP417)  
 Philippe Ryckelynck, J., v13 (SO28)  
 Pia Angellotti, M., v300 (MP297)  
 Pia Rastaldi, M., v204 (MP005)  
 Piantanida, M., v139 (SP358)  
 Piccinni, P., v51 (SP095)  
 Piccoli, C., v31 (SP036)  
 Piccoli, G., v251 (MP152)  
 Piccoli, G.B., v251 (MP152), v285 (MP251)  
 Piecha, G., v195 (MO24)  
 Piechota, H.-J., v23 (SP010)  
 Piedad Ruiz-Torres, M., v206 (MP011)  
 Pienkowska, J., v101 (SP245)  
 Pierides, A., v55 (SP107), v56 (SP110)  
 Pierik, M., v163 (SP432)  
 Pieringer, H., v172 (SP460)  
 Pierre Sabatier, J., v13 (SO28)  
 Pietruck, F., v253 (MP160)  
 Pietrzak, I., v318 (MP352)  
 Pietura, R., v148 (SP385)  
 Pilotovich, V.S., v108 (SP268), v239 (MP116)  
 Pintér, I., v235 (MP104)  
 Pinto, J.R., v362 (MP486)  
 Piontek, K., v247 (MP142)  
 Piotti, G., v203 (MP003), v317 (MP348)  
 Piperno, R., v368 (MP503)  
 Pires, A., v286 (MP258)  
 Pires, C., v121 (SP304)  
 Pires, C.E., v320 (MP360)  
 Pirim, I., v281 (MP241)  
 Pirogowicz, I., v131 (SP334), v132 (SP336)  
 Pirson, Y., v357 (MP472)  
 Pisacco, P., v351 (MP453)  
 Pisani, A., v52 (SP099)  
 Pisanu, A., v295 (MP284)  
 Pisoni, R.L., v326 (MP379)  
 Pistolas, D., v177 (SP476)  
 Pittoni, G., v51 (SP095)  
 Pizzarelli, F., v259 (MP177)  
 Pizzini, P., v75 (SP169), v306 (MP314)  
 Pizzolitto, S., v11 (SO23)  
 Plaisier, E., v211 (MP027)  
 Plank, C., v207 (MP015), v361 (#)  
 Plati, A., v296 (MP286)  
 Pljesa, S., v321 (MP362)  
 Plone, M., v93 (SP221)  
 Plouin, P.-F., v61 (SP127)  
 Plum, J., v335 (MP405)  
 Podolec, P., v303 (MP307), v305 (MP312)  
 Pojer, M., v220 (MP056)  
 Polak-Jonkisz, D., v96 (SP229)  
 Polakovic, V., v134 (SP344), v263 (MP189), v330 (MP390)  
 Polat, H., v254 (MP162)  
 Polcyn-Adamczak, M., v227 (MP079)  
 Poledne, R., v9 (SO19)  
 Polenakovic, M., v85 (SP197), v252 (MP157)  
 Polenakovic, M., v154 (SP403)  
 Poli, D., v172 (SP459), v331 (MP391)  
 Poli, F., v354 (MP462)  
 Polo, J.R., v90 (SP211)  
 Poltavets, N., v69 (SP150)  
 Polykov, A., v69 (SP150)  
 Ponce, P., v18 (SO44), v147 (SP383), v259 (MP179), v269 (MP205)  
 Pons, R., v84 (SP194)  
 Ponticelli, C., v4 (SO05)  
 Pontoriero, G., v5 (SO08)  
 Pontrelli, P., v4 (SO04), v160 (SP423), v163 (SP433), v203 (MP002)  
 Poorrezaghali, F., v167 (SP446)  
 Popoola, J., v56 (SP109)  
 Popov, Z., v183 (SP493), v184 (SP496)  
 Popovic, J.X., v321 (MP363)  
 Popovska-Jankovic, K., v252 (MP157)  
 Porazko, T., v149 (SP388)  
 Porreca, S., v198 (MO32)  
 Porrezaghali, F., v170 (SP455)  
 Porst, M., v207 (MP015), v245 (MP134)  
 Port, F.K., v326 (MP379)  
 Portalupi, V., v341 (MP423), v351 (MP453)  
 Portoles, J., v17 (SO40), v79 (SP179), v264 (MP193)  
 Possante, M., v362 (MP486)  
 Postaci, N., v48 (SP087)  
 Postorino, M., v174 (SP466)  
 Potamianou, A., v116 (SP291), v289 (MP266), v290 (MP268)  
 Pougounia, K., v43 (SP072)  
 Pour-Reza-Gholi, F., v163 (SP434)  
 Pourfarziani, V., v170 (SP455)  
 Pourmand, G., v161 (SP426), v171 (SP458), v249 (MP147), v364 (MP493)  
 Poveda, R., v20 (SP003), v71 (SP155)  
 Pozzoni, P., v200 (MO38)  
 Prager, R., v243 (MP129)  
 Prakash, K.G., v365 (#)  
 Premru, V., v114 (SP286), v276 (MP224)  
 Prendergast, J., v191 (MO14)  
 Pressmar, K., v178 (SP478)  
 Pressmar, K.M., v181 (SP488)  
 Presvelos, D., v57 (SP114), v241 (MP123)  
 Pretagostini, R., v365 (MP494)  
 Pridjian, G., v58 (SP118)  
 Prikhodina, L., v69 (SP150)  
 Prisco, D., v172 (SP459)  
 Procida, C., v260 (MP182)  
 Procopio, V., v374 (TO09)  
 Prokopenko, E.I., v362 (MP485)  
 Prokopiuk-Wierzbicka, M., v285 (MP254)  
 Protopappa, M., v110 (SP272), v111 (SP277)  
 Przedlacki, J., v80 (SP184)  
 Puig, J.M., v375 (TO12)  
 Puliyclil, M.A., v265 (MP196)  
 Puretic, Z., v85 (SP196)  
 Purroy, A., v273 (MP218)  
 Purzyc, L., v96 (SP229)  
 Puschett, J.B., v58 (SP118)  
 Puskas, L.G., v40 (SP063)  
 Pussell, B., v165 (SP439)  
 Pussell, B.A., v90 (SP212), v258 (MP176)  
 Puttinger, H., v59 (SP119)  
 Pyo Kang, K., v30 (SP034)  
 Quaglia, M., v356 (MP467)  
 Quartarone, A., v122 (SP307)  
 Quarteroni, A., v346 (MP436)  
 Qureshi, A.R.T., v83 (SP192), v84 (SP193), v99 (SP237)  
**R**  
 Rabindranath, K.S., v336 (MP408), v338 (MP414)  
 Racek, J., v297 (#)  
 Raczka, A., v285 (MP254)  
 Radenkovic, N.M., v132 (SP337)  
 Radenkovic, S.B., v132 (SP337)  
 Radivojevic, D.M., v253 (MP159)  
 Radko, K., v278 (MP231)  
 Radojicic, Z., v300 (MP298)  
 Rae Lee, Y., v104 (SP255)  
 Raffetseder, U., v29 (SP029)  
 Ragab, M.S., v223 (MP065)  
 Rahbar, K., v324 (MP372)  
 Rahmouni, K., v99 (SP240)  
 Raiteri, M., v354 (MP462)  
 Rajdl, D., v297 (#)  
 Raju, S., v49 (SP089)  
 Rajzer, M., v309 (MP325)  
 Rama, I., v20 (SP003), v194 (MO22)  
 Raman Rao, A.V., v337 (MP411)  
 Ramdani, B., v101 (SP246)  
 Rámila, D., v27 (SP023), v206 (MP010)  
 Rammos, G., v57 (SP114), v241 (MP123)  
 Ramos, D., v360 (MP479)  
 Ramos, E., v322 (MP366)  
 Rampino, T., v28 (SP027), v203 (MP003), v210 (MP023), v317 (MP348)  
 Rampure, S., v365 (#)  
 Ranieri, E., v4 (SO04), v155 (SP408), v158 (SP416), v163 (SP433), v203 (MP002), v214 (MP037), v217 (MP047), v218 (MP050), v246 (MP137)  
 Raouf Elimad, Z., v162 (SP430)  
 Raoul, R., v100 (SP243)  
 Rapisarda, F., v289 (MP265), v301 (MP300)  
 Rasche, F.M., v228 (MP082)  
 Rascher, W., v361 (#)  
 Rashid, G., v25 (SP016)  
 Rashid, H.U., v269 (MP207)  
 Rashid Farokhi, F., v324 (MP372)  
 Rashid Farokhi, F., v45 (#), v46 (#)  
 Rashid Qureshi, A., v78 (SP177), v130 (SP331), v137 (SP351), v309 (MP324), v312 (MP332)  
 Rashtchi, M., v273 (MP216)  
 Rashtchi Zadeh, N., v273 (MP216)  
 Ratanarat, R., v333 (MP398), v334 (MP402), v372 (TO05)  
 Ratto, E., v57 (SP112)  
 Rauf Chaudhary, A., v340 (MP418)  
 Rauh, M., v361 (#)  
 Ravani, P., v75 (SP169)  
 Ravera, F., v180 (SP484)  
 Rayner, H.C., v326 (MP379)  
 Razeghi, E., v307 (MP318)  
 Rdez Iñigo, E., v253 (MP161)  
 Reach, I., v118 (SP297)  
 Rebollo, P., v337 (MP409)  
 Reboredo, J.M.M., v217 (MP045)  
 Reddy, S., v3 (SO03)  
 Regele, H., v159 (SP419)

- Registry of Renal Patients, C., v173 (SP462), v295 (MP282), v308 (MP320)
- Rehorova, J., v63 (SP133), v241 (MP125)
- Reichel, H., v89 (SP210)
- Reinke, P., v175 (SP470)
- Reis, P., v303 (MP306)
- Reiterova, J., v72 (SP160), v233 (MP099), v248 (MP144)
- Rempfort, A., v180 (SP485)
- Renkema, K., v98 (SP234)
- Renner, F., v160 (SP424)
- Renz, H., v17 (SO41)
- Renzetti, G.A., v341 (MP423)
- Reunanen, A., v241 (MP124)
- Rexrode, S., v319 (MP354)
- Reynes, J., v249 (MP146)
- Reza Ardalan, M., v44 (SP073), v127 (SP320), v252 (MP155), v273 (MP216)
- Reza Hamidian, M., v64 (SP136)
- Reza Khalilzadeh, M., v252 (MP155)
- Reza Khazaei, M., v277 (#)
- Reza Nikoobakht, M., v161 (SP426), v249 (MP147), v364 (MP493)
- Reza Nkoobakht, M., v171 (SP458)
- Reza Samimagham, H., v331 (MP392)
- Rezaei, F., v127 (SP320)
- Rezaei, M., v167 (SP446)
- Ribeiro, A.S.L., v213 (MP034)
- Ribera, L., v302 (MP303)
- Ribes, D., v45 (SP076), v64 (SP137), v164 (SP435, SP436), v166 (SP441)
- Riboni, R., v197 (MO29)
- Ricchiuti, V., v116 (SP290)
- Ricci, C., v218 (MP049)
- Ricci, Z., v333 (MP398), v334 (MP402)
- Ricciardi, D., v300 (MP297)
- Richard, B., v65 (SP139)
- Richard, J.-B., v212 (MP031)
- Richards, N., v18 (SO44), v147 (SP383), v259 (MP179), v269 (MP205)
- Richeldi, L., v180 (SP484)
- Ricotti, E., v158 (SP417)
- Riedel, E., v299 (#), v311 (MP329)
- Riegel, W., v115 (SP288)
- Rieger, P., v38 (SP055)
- Riegger, G.A.J., v21 (SP006)
- Riela, M.C., v276 (MP227)
- Rigler, P., v51 (SP095)
- Rigotti, P., v155 (SP407)
- Rihova, Z., v233 (MP099)
- Rikker, C., v150 (SP390)
- Rinaldi, S., v342 (MP425)
- Rinat, C., v190 (MO11)
- Rindi, P., v218 (MP049)
- Rindi, S., v218 (MP049)
- Rioux, N., v230 (MP088), v287 (MP259)
- Ripoli, M., v31 (SP036)
- Risaliti, A., v358 (MP474)
- Rischmann, P., v358 (MP473)
- Risler, T., v107 (SP265), v257 (MP171)
- Rita Dessi, M., v105 (SP256)
- Rita Sala, M., v374 (TO09)
- Ritz, E., v36 (SP051), v37 (SP054), v38 (SP055), v197 (MO30)
- Rius, A., v347 (MP442)
- Riveira, E., v3 (SO02)
- Rivera, C.F., v217 (MP045)
- Rivero, A., v239 (MP117)
- Riza Altiparmak, M., v330 (MP389)
- Rizzioli, E., v334 (MP400)
- Roasio, L., v4 (SO05), v29 (SP031), v32 (SP040), v33 (SP041), v158 (SP417), v210 (MP025)
- Roberts, I.S., v3 (SO03)
- Roca, L., v217 (MP047)
- Roca-Tey, R., v143 (SP367)
- Rocca-Rey, L., v103 (SP251)
- Roccatello, D., v10 (SO22)
- Rocha, C., v154 (SP405)
- Rocha, S., v39 (SP058)
- Roche, A., v261 (MP185), v266 (MP197), v271 (MP211)
- Rohtchina, E., v137 (SP352)
- Roderick, P.J., v190 (MO10), v336 (MP408), v338 (MP414)
- Rodrigo, E., v278 (MP230)
- Rodrigues, A.C., v21 (SP005)
- Rodrigues, M., v34 (SP045)
- Rodríguez, A., v239 (MP117)
- Rodríguez, A., v322 (MP366)
- Rodríguez, I., v73 (SP163)
- Rodríguez, M., v25 (SP017)
- Rodríguez, M.E., v25 (SP017)
- Rodríguez-Benitez, P., v90 (SP211)
- Rodríguez-Carmona, A., v135 (SP346), v342 (MP424), v344 (MP432)
- Rodríguez-Palomares, J.R., v286 (MP255)
- Rodríguez-Puyol, D., v206 (MP011)
- Rodríguez-Puyol, M., v206 (MP012)
- Roe, P.J., v7 (SO12)
- Roessler, A., v25 (SP018)
- Roggero, S., v365 (MP494), v366 (MP497)
- Rognant, N., v13 (SO28)
- Rohde, F., v158 (SP418)
- Rojas-Campos, E., v202 (MO42), v349 (MP448), v350 (MP450, MP451)
- Roland, R., v44 (SP075)
- Roldan, C., v57 (SP112, SP113)
- Romagnoli, A., v105 (SP256)
- Romano, P., v298 (MP290)
- Romanowski, M., v182 (SP490)
- Romão Junior, J.E., v276 (MP227)
- Romeo, A., v90 (SP213)
- Romero, J.C., v40 (SP062), v65 (SP140)
- Romero, R., v364 (MP491)
- Romero, W., v213 (MP032)
- Romic, Z., v289 (MP264)
- Ronco, C., v51 (SP095), v156 (SP412), v262 (MP188), v333 (MP398), v334 (MP402), v372 (TO05)
- Ronco, P., v211 (MP027)
- Roncon Albuquerque, R., v213 (MP034)
- Roncon-Albuquerque Jr, R., v34 (SP045), v42 (SP067)
- Ronda, N., v30 (SP032)
- Rong, S., v8 (SO15)
- Roob, J., v345 (MP433)
- Roos, M., v187 (MO03)
- Rosa, P., v270 (MP209)
- Rosalia, V., v270 (MP209)
- Rosaria Caropreso, M., v220 (MP055), v230 (MP087), v234 (MP100)
- Rosas, S.E., v7 (SO12)
- Rosati, A., v172 (SP459), v368 (MP503)
- Roscini, E., v28 (SP027), v203 (MP003)
- Rosenbaum, D., v140 (SP360)
- Rosenberg, R., v294 (MP279)
- Rosenberger, C., v299 (#), v311 (MP329)
- Rosenberger, J., v44 (SP075)
- Rosivall, L., v40 (SP064), v150 (SP390)
- Rossant, J., v199 (MO35)
- Rossert, J., v275 (MP222)
- Rossi, D., v10 (SO22), v300 (MP297)
- Rossi, N., v109 (SP269)
- Rossi, S., v141 (SP361)
- Rossignol, P., v61 (SP127)
- Rossing, K., v14 (SO33), v20 (SP001)
- Rossini, M., v229 (MP084)
- Rostaing, L., v45 (SP076), v64 (SP137), v164 (SP435, SP436), v166 (SP441), v358 (MP473)
- Roszkowska-Blaim, M., v62 (SP130), v210 (MP022)
- Roth, B., v178 (SP478), v181 (SP488)
- Rothman, K.J., v103 (SP253)
- Rotter, V., v39 (SP059), v204 (MP006)
- Rouanet, C., v298 (MP291)
- Rouanet, S., v262 (MP187)
- Roudbari, M., v64 (SP136)
- Roversi, P., v180 (SP484)
- Rozanski, J., v73 (SP162), v168 (SP449), v182 (SP490)
- Rozi, P., v111 (SP277)
- Ruan, X., v15 (SO35)
- Rubio, L., v360 (MP479)
- Rudenko, T., v79 (SP178)
- Ruediger Hetzel, G., v327 (MP381)
- Ruggiero, P., v257 (MP173), v372 (TO06)
- Ruggiero, R., v104 (#)
- Rugina, L., v228 (MP081)
- Ruilope, L., v242 (MP127)
- Ruilope, L.M., v57 (SP112, SP113)
- Ruiz, A., v154 (SP404)
- Ruiz, P., v244 (MP132), v245 (MP136)
- Rumyantsev, A.S., v80 (SP182), v141 (SP363)
- Runowski, D., v127 (SP321), v222 (MP064)
- Ruocco, C., v104 (#)
- Rupprecht, H., v20 (SP001)
- Russ, G., v165 (SP439)
- Russell, C., v3 (SO03)
- Russo, D., v104 (#)
- Russo, R., v198 (MO32)
- Rustichelli, R., v103 (SP250)
- Rustom, R., v12 (SO25), v211 (MP028), v237 (MP110)
- Rusu, E., v77 (SP175)
- Ruth Wu-Wong, J., v15 (SO35)
- Rutkowska, B., v101 (SP245)
- Rutkowski, B., v33 (SP043), v59 (SP119), v60 (SP123), v101 (SP245), v352 (MP455)
- Rutkowski, P., v59 (SP119)
- Rychlík, I., v220 (MP056), v244 (MP131)
- Rychly, J., v330 (MP388)
- Rydzewska-Rosolowska, A., v21 (SP004), v319 (MP355), v320 (MP357, MP358)
- Ryeol Ryu, D., v126 (SP319)
- Rysava, R., v220 (MP056), v233 (MP099)
- Ryu, D.-R., v310 (MP326, MP328), v311 (MP331)

## S

- Saadat, A., v170 (SP455)
- Saatci, U., v133 (SP338), v179 (SP481)
- Sabatier, F., v63 (SP134)
- Sabbatini, M., v52 (SP099), v166 (SP443)
- Sachetelli, S., v23 (SP012)
- Sacks, D., v68 (SP148)
- Sacquepee, M., v161 (SP428)
- Sadikoglu, B., v351 (MP452)
- Sadlier, D.M., v371 (TO01)
- Saeed, M., v231 (MP093)

- Saffioti, S., v374 (TO09)  
 Safranow, K., v168 (SP449), v182 (SP490)  
 Sagedal, S., v199 (MO34)  
 Saglam, F., v273 (MP217)  
 Saglam, M., v18 (SO43), v171 (SP457)  
 Sagova, M., v134 (SP344), v330 (MP390)  
 Sahebajame, M., v331 (MP392)  
 Sahin, G., v134 (SP343)  
 Sahin, I., v288 (MP261)  
 Sahin, M., v315 (MP344)  
 Sahin, S., v229 (MP086)  
 Sahin, T., v301 (MP299)  
 Sahiner, L., v26 (SP021)  
 Saïd, S., v100 (SP242)  
 Saied, H.M., v341 (MP421), MP422)  
 Saijyo, T., v102 (SP248)  
 Sailer, L.K., v228 (MP082)  
 Sainz, M., v358 (MP474)  
 Saji, F., v87 (SP202)  
 Sakaguchi, T., v87 (SP202)  
 Sakai, K., v118 (SP296)  
 Sakakima, M., v52 (SP097, SP098)  
 Sakellariou, G., v346 (MP438), v354 (MP461)  
 Sakka, E., v290 (MP267)  
 Sakova, R., v134 (SP344)  
 Sakurai, H., v27 (SP022)  
 Sala, P., v259 (MP177)  
 Salanova, L., v143 (SP368)  
 Salas, S.P., v213 (MP032)  
 Salauddin, ., v365 (#)  
 Saldarelli, M., v203 (MP002)  
 Saleh Al Wakeel, J., v340 (MP418)  
 Salobir, B., v267 (MP199)  
 Salvadori, M., v172 (SP459), v359 (MP476),  
 v368 (MP503)  
 Salvatori, G., v156 (SP412), v334 (MP402)  
 Samon, R., v143 (SP367)  
 Sampaio Norton, S., v166 (SP442),  
 v213 (MP034)  
 Sampaio-Maia, B., v24 (SP015), v34 (SP045),  
 v42 (SP067)  
 Sampath, K., v95 (SP226)  
 Sampol, J., v63 (SP134)  
 San Segundo, D., v359 (MP477)  
 Sanadgol, H., v45 (#), v46 (#)  
 Sanaka, T., v208 (MP017), v313 (MP335)  
 Sanchez, L., v106 (SP260, SP261)  
 Sánchez Sobrino, B., v120 (SP302)  
 Sánchez-González, M., v343 (MP427)  
 Sanchez-Ibarrola, A., v273 (MP218)  
 Sánchez-Plumed, J., v360 (MP479)  
 Sancho, A., v154 (SP404), v164 (SP437)  
 Sandmann, W., v183 (SP494)  
 Sang Lee, J., v222 (MP061), v284 (MP248)  
 Sano, H., v5 (SO08)  
 Santamaria, C., v272 (MP213)  
 Santi, S., v28 (SP028)  
 Santiago, C., v84 (SP194)  
 Santillo, M.R., v52 (SP099)  
 Sântimbrean, C., v267 (MP201)  
 Santirosi, P., v300 (MP297)  
 Santoro, A., v47 (SP085), v48 (SP086),  
 v50 (SP092), v288 (MP263),  
 v328 (MP383), v334 (MP400)  
 Santoro, G., v97 (SP231), v123 (SP310)  
 Santos, J.R., v362 (MP486)  
 Santos, O.R., v308 (MP322)  
 Santos, R.J., v320 (MP360)  
 Santos Araujo, C., v166 (SP442),  
 v213 (MP034)  
 Santos-Araújo, C., v34 (SP045)  
 Sanz, P., v332 (MP396)  
 Sanz Guajardo, D., v120 (SP302)  
 Sapilak, B.J., v131 (SP334), v132 (SP336),  
 v319 (MP356)  
 Sar, A., v209 (MP019)  
 Sarac, E., v264 (MP192)  
 Sarai, A., v126 (SP318), v351 (MP454)  
 Saraiva, M.J., v247 (MP140)  
 Saran, R., v326 (MP379)  
 Sarioglu, S., v208 (MP018), v227 (MP077,  
 MP078)  
 Sariyar, M., v184 (SP495)  
 Saroglou, G., v177 (SP476)  
 Saronio, P., v281 (MP240)  
 Sarpkaya, S., v130 (SP330)  
 Sasaki, M., v316 (MP347)  
 Sato, K., v276 (MP226)  
 Sato, S., v112 (SP280)  
 Sato, T., v112 (SP280), v347 (MP440)  
 Sau, G., v107 (SP263)  
 Saura, M., v206 (MP012)  
 Savaj, S., v49 (SP088)  
 Saval, N., v6 (SO10), v97 (SP233)  
 Savino, K., v300 (MP297)  
 Savoldi, S., v210 (MP025)  
 Savost' anov, K.V., v219 (#)  
 Sayarlioglu, H., v317 (MP349), v321 (MP364)  
 Sayd-Ahmad, N.A., v222 (MP063)  
 Sayed Rezazadeh, E., v127 (SP320)  
 Sbragia, G., v28 (SP028), v75 (SP167),  
 v162 (SP431)  
 Sburlan, A.S., v73 (SP161)  
 Scalamogna, M., v354 (MP462)  
 Scalzulli, P.R., v332 (MP397)  
 Scapini, A., v122 (SP308)  
 Schaefer, C., v16 (SO37), v105 (SP257)  
 Schaefer, R.M., v275 (MP222, MP223)  
 Schaeufele, T., v195 (MO23)  
 Schafflhuber, M., v22 (SP009)  
 Schalling, M., v78 (SP177), v130 (SP331),  
 v137 (SP351), v309 (MP324),  
 v312 (MP332)  
 Schanstra, J.P., v251 (MP153)  
 Scheibler, F., v322 (MP365), v326 (MP377)  
 Schena, A., v4 (SO04), v158 (SP416),  
 v160 (SP423)  
 Schena, F.P., v4 (SO04), v147 (SP381),  
 v158 (SP416), v160 (SP423), v163 (SP433),  
 v165 (SP439, SP440), v198 (MO32),  
 v202 (MO43), v203 (MP002),  
 v216 (MP042), v229 (MP084),  
 v260 (MP182)  
 Schena, P.F., v155 (SP408), v165 (SP438),  
 v218 (MP050), v359 (MP478)  
 Schepers, E., v218 (MP048), v293 (MP277),  
 v294 (MP278)  
 Scherbakova, E.O., v362 (MP485)  
 Scherhag, A., v299 (#), v311 (MP329)  
 Schillaci, O., v298 (MP290)  
 Schillinger, M., v292 (MP272)  
 Schlatter, E., v23 (SP010)  
 Schlieper, G., v188 (MO05)  
 Schloendorff, D., v371 (TO01)  
 Schlondorff, D., v196 (MO27)  
 Schmid, H., v371 (TO01)  
 Schmidt, M., v54 (SP105)  
 Schmidt, R., v85 (SP197), v195 (MO24),  
 v330 (MP388)  
 Schmidt-Gayk, H., v6 (SO09)  
 Schmieder, R.E., v69 (SP149), v195 (MO23),  
 v242 (MP127), v245 (MP134)  
 Schmitz, M., v335 (MP405)  
 Schneditz, D., v117 (SP292), v372 (TO04)  
 Schneeweiss, S., v243 (MP130)  
 Schneider, R., v54 (SP105)  
 Schnuelle, P., v159 (SP421)  
 Scholze, A., v28 (SP025), v96 (SP230)  
 Schoorl, M., v123 (SP311, SP311),  
 v124 (SP312, SP312)  
 Schratzberger, G., v159 (SP419)  
 Schreiber, R., v275 (MP223)  
 Schroth, M., v361 (#)  
 Schuck, O., v9 (SO19), v70 (SP152)  
 Schuemann, E., v115 (SP288), v122 (SP306)  
 Schuler, E., v264 (MP192)  
 Schultze, N., v269 (MP206)  
 Schulze, B.D., v245 (MP134)  
 Schwarting, A., v10 (SO20), v248 (MP143)  
 Schwarz, A., v158 (SP418)  
 Schwarz, A.A., v88 (SP205)  
 Schwenger, V., v193 (MO18)  
 Schwesinger, C., v15 (SO36)  
 Schwind, K.-H., v42 (SP069)  
 Schwöbel, J., v181 (SP488)  
 Scigalla, P., v85 (SP197), v195 (MO24)  
 Scrima, R., v31 (SP036)  
 Scudellaro, R., v197 (MO29), v208 (MP016)  
 Sedigh, N., v167 (SP446)  
 Sefer, S., v120 (SP301)  
 Segarra, A., v194 (MO20)  
 Segelmark, M., v231 (MP092)  
 Segoloni, G., v165 (SP439)  
 Segoloni, G.P., v251 (MP152), v285 (MP251),  
 v336 (MP407), v366 (MP497)  
 Segura, J., v57 (SP112, SP113)  
 Seibold, S., v54 (SP105)  
 Seidel, P., v330 (MP388)  
 Seifi, S., v81 (SP185), v307 (MP318)  
 Seifolah, A., v49 (SP088)  
 Sekercioglu, N., v350 (MP449)  
 Seki, M., v27 (SP022)  
 Selby, N.M., v119 (SP298), v331 (MP394),  
 v340 (MP419, MP420)  
 Selcuk, N.Y., v281 (MP241)  
 Selgas, R., v253 (MP161), v332 (MP396),  
 v343 (MP427)  
 Selim, G., v116 (SP289), v310 (MP327)  
 Sellars, L., v142 (SP364), v145 (#),  
 v148 (SP384)  
 Sellers, M., v169 (SP452)  
 Semenovykh, P.S., v236 (MP107)  
 Sen, S., v61 (SP128), v168 (SP450),  
 v201 (MO39), v285 (MP252)  
 Sena, L.M., v10 (SO22)  
 Sener, D., v279 (MP234)  
 Senf, R., v175 (SP470)  
 Sengoelge, G., v41 (SP066)  
 Sengul, E., v139 (SP356), v301 (MP299),  
 v324 (MP370)  
 Sengul, S., v74 (SP165), v291 (MP270),  
 v361 (MP484)  
 Sennaroglu, E., v315 (MP344)  
 Senol, A., v61 (SP126)  
 Seo, J.-W., v374 (TO10)  
 Seok Jeon, J., v201 (MO40)  
 Seok Yang, W., v234 (MP101), v274 (MP221)  
 Seong Kim, J., v310 (MP326, MP328),  
 v311 (MP331)  
 Sepe, V., v109 (SP269), v341 (MP423),  
 v351 (MP453)  
 Serbest, S., v134 (SP343)  
 Serdengetci, K., v149 (SP389), v184 (SP495)

- Seres, I., v326 (MP378), v360 (MP481)  
 Serio, V., v52 (SP099)  
 Serón, D., v356 (MP469)  
 Seron, D., v357 (MP470)  
 Serpieri, N., v197 (MO29)  
 Serra, A.L., v88 (SP205)  
 Serra, I., v28 (SP027), v203 (MP003)  
 Serra, M., v106 (SP262)  
 Serrano, A., v144 (SP372)  
 Serrano, I., v206 (MP011, MP012)  
 Serrao, P., v24 (SP015)  
 Sertdemir, Y., v357 (MP471)  
 Sesso, R., v151 (SP394)  
 Seun Kim, Y., v12 (SO26), v98 (SP235, SP236), v157 (SP414), v173 (SP463), v174 (SP467), v207 (MP013)  
 Seung Lee, J., v46 (SP081), v221 (MP058, MP059, MP060), v226 (MP074), v231 (MP091), v278 (MP232, MP233)  
 Sever, L., v346 (MP439)  
 Sever, M.S., v114 (SP285)  
 Sevim Gokalp, A., v60 (SP122)  
 Seyahi, N., v149 (SP389), v184 (SP495)  
 Seymen, P., v160 (SP422), v182 (SP491)  
 Seyrafiyan, S., v45 (#), v46 (#)  
 Sezer, M.Tugrul, v49 (SP090), v219 (MP053)  
 Sezer, S., v4 (SO06), v131 (SP333, SP335), v136 (SP348), v138 (SP355), v161 (SP427), v162 (SP429), v201 (MO41), v209 (MP019), v266 (MP198), v297 (MP289), v300 (MP296), v347 (MP441)  
 Sezgin, N., v133 (SP338)  
 Sezis, M., v168 (SP450), v181 (SP486), v182 (SP489)  
 Sfakianaki, M., v62 (SP131), v238 (MP113)  
 Sferopoulos, G., v152 (SP399)  
 Shah, N., v266 (MP197), v271 (MP210, MP211)  
 Shahapuni, I., v99 (SP240), v101 (SP244)  
 Shaheen, N., v193 (MO19)  
 Shakhnova, E.A., v281 (MP242)  
 Shalamanova, L., v211 (MP028)  
 Shalhoub, V., v196 (MO26)  
 Shapiro, C.M., v68 (SP146)  
 Sharifian, M., v167 (SP446)  
 Sharifian, M.D., v250 (MP149)  
 Sharma, R.K., v225 (MP072)  
 Shatzen, E., v196 (MO26), v204 (MP004)  
 Shayanfar, N., v176 (SP471)  
 Sheashaa, H.A., v161 (SP425)  
 Shehab El-Din, A.B., v171 (SP456)  
 Shemer-Avni, Y., v253 (MP158)  
 Shenouda, M.S., v83 (SP190)  
 Shestakov, A.E., v219 (#)  
 Shestakova, M.V., v239 (#)  
 Shi, S., v194 (MO21)  
 Shiang, J.-C., v79 (SP180)  
 Shidara, K., v103 (SP252)  
 Shih, T.-f., v327 (MP380)  
 Shiizaki, K., v87 (SP202)  
 Shilo, V.Y., v275 (MP223)  
 Shilov, E.M., v281 (MP242)  
 Shimada, M., v254 (MP163)  
 Shimizu, Y., v27 (SP022)  
 Shimozato, S., v316 (MP347)  
 Shin, Y.-T., v53 (SP102), v284 (MP249)  
 Shinohara, N., v129 (SP327)  
 Shiomi, S., v313 (MP335)  
 Shiratake, M., v102 (SP248)  
 Shirley, D.G., v29 (SP030)  
 Shokeir, A.A., v171 (SP456)  
 Shoushan, R., v117 (SP293)  
 Shrivastava, R., v355 (MP464)  
 Shutov, A.M., v134 (SP341)  
 Shutov, E.V., v113 (SP282)  
 Shvetsov, M., v79 (SP178)  
 Shwarz, L., v117 (SP293)  
 Siamopoulos, K., v31 (SP035)  
 Siamopoulos, K.C., v115 (SP287), v145 (SP377), v260 (MP180), v301 (MP301)  
 Siapera, V., v126 (SP317)  
 Siddiqui, S., v225 (MP073)  
 Sidoti, A., v191 (MO13)  
 Siekiera, U., v170 (SP453)  
 Siems, W.G., v133 (SP339)  
 Sienko, J., v182 (SP490)  
 Sigrist, M.K., v91 (SP215), v102 (SP247), v189 (MO07)  
 Sijpkens, Y.W., v78 (SP176), v190 (MO09)  
 Sik Chang, Y., v113 (SP283), v144 (SP374), v148 (SP386), v235 (MP106)  
 Sik Park, J., v274 (MP221)  
 Sikole, A., v85 (SP197), v95 (SP228), v376 (TO14)  
 Silva, S.C.C.G., v144 (SP373)  
 Silver, J., v24 (SP014)  
 Silvestris, I., v31 (SP037)  
 Sim Kim, J., v53 (SP100)  
 Simachowicz, A., v71 (SP156)  
 Simeonidou, K., v265 (MP194)  
 Simfroosh, N., v167 (SP446)  
 Simic, P., v95 (SP226)  
 Simic, S.Z., v321 (MP363)  
 Simjanovska, L., v252 (MP157)  
 Simón, J., v360 (MP479)  
 Simon, P., v230 (MP088), v287 (MP259)  
 Simone, S., v147 (SP381), v198 (MO32), v260 (MP182)  
 Simonet, A., v339 (MP417)  
 Simonet, M., v339 (MP417)  
 Simpson, K., v268 (MP202)  
 Sindel, S., v8 (SO14), v62 (SP129), v111 (SP275), v304 (MP308)  
 Singan, M., v297 (MP289), v300 (MP296)  
 Singh, R., v360 (MP480)  
 Singh, U., v225 (MP072)  
 Sioulis, A., v128 (SP325)  
 Sipahi, S., v182 (SP489), v358 (MP475)  
 Sipka, S., v325 (MP376)  
 Sirin, A., v351 (MP452)  
 Sirolii, V., v43 (SP071), v117 (SP294), v316 (MP345)  
 Sis, B., v227 (MP078)  
 Sit, D., v24 (SP013)  
 Sita, S., v28 (SP027), v203 (MP003)  
 Sitar, D.S., v319 (MP354)  
 Siwinska, A., v222 (MP064)  
 Sjostrom, P., v64 (SP135)  
 Skibova, J., v70 (SP152)  
 Skoczylas, A., v8 (SO16)  
 Slavicek, J., v85 (SP196)  
 Slavicek, V., v85 (SP196)  
 Slavíková, M., v151 (SP395)  
 Slavkovska, A., v252 (MP157)  
 Slinin, Y., v99 (SP239)  
 Smalcelj, R., v85 (SP196)  
 Smalling, R., v265 (#)  
 Smeets, R., v16 (SO37)  
 Smetana, S., v68 (SP148)  
 Smirnov, A.V., v70 (SP153), v80 (SP182), v141 (SP363)  
 Smit, W., v200 (MO37)  
 Smith, B., v255 (MP166)  
 Smolenski, O., v88 (SP207)  
 Smrckova, I., v70 (SP152)  
 Smrzova, J., v63 (SP133), v241 (MP125)  
 Snoeck, R., v14 (SO31)  
 So, B.-J., v98 (SP235, SP236), v157 (SP414), v173 (SP463)  
 Sobh, M.A., v80 (SP181), v161 (SP425), v168 (SP447), v171 (SP456), v222 (MP063), v361 (MP482)  
 Soccio, G., v28 (SP027), v109 (SP269), v210 (MP023)  
 Sofia, A., v374 (TO09)  
 Solari, P., v259 (MP177)  
 Soler, M.José, v375 (TO12)  
 Solomon, L.R., v72 (SP158)  
 Solski, J., v77 (SP173)  
 Soltani, A., v81 (SP185)  
 Somers, V.K., v60 (SP123)  
 Sommerer, C., v292 (MP274)  
 Sonikian, M.A., v343 (MP428)  
 Sonkodi, S., v40 (SP063), v100 (SP241)  
 Sonmez, A., v18 (SO43), v168 (SP448), v171 (SP457), v212 (MP029, MP030)  
 Sonmez, F., v226 (MP076), v250 (MP150)  
 Soo Kim, B., v113 (SP283), v148 (SP386)  
 Soo Kim, J., v201 (MO40)  
 Soo Kim, Y., v53 (SP100), v113 (SP283), v144 (SP374, SP374), v148 (SP386)  
 Soo Kwak, I., v211 (MP026)  
 Soo Lim, C., v222 (MP061)  
 Sook Lee, Y., v92 (SP216), v146 (SP378), v323 (MP368)  
 Soragna, G., v251 (MP152)  
 Sorbet, M.J., v87 (SP204)  
 Sorino, P., v342 (MP425)  
 Sotsiou, F., v228 (MP083)  
 Sotsiou, F.K., v34 (SP046)  
 Sourial, M., v53 (SP101)  
 Sousa, J., v362 (MP486)  
 Sousa, M.F., v247 (MP142)  
 Soylemezoglu, O., v63 (SP132), v220 (MP057), v346 (MP439)  
 Soyly, A., v38 (SP056), v208 (MP018), v227 (MP077, MP078)  
 Sözbilen, M., v182 (SP489)  
 Spalding, E.M., v99 (SP238), v328 (MP384)  
 Spandou, E., v265 (MP194)  
 Sparks, S., v56 (SP109)  
 Spasovski, G., v85 (SP197), v95 (SP228), v184 (SP496)  
 Spasovski, G.B., v183 (SP493), v376 (TO14)  
 Specchio, A., v139 (SP358)  
 Specks, U., v187 (MO02)  
 Sperandio, M., v105 (SP256)  
 Splendiani, G., v105 (SP256), v136 (SP347)  
 Spoto, B., v295 (MP284)  
 Sprague, S., v89 (SP208)  
 Spustova, V., v87 (SP203)  
 Srivastava, A., v225 (MP072)  
 Staak, A., v160 (SP424)  
 Stabellini, G., v155 (SP409)  
 Stack, A.G., v76 (SP172)  
 Stadlbauer, V., v117 (SP292)  
 Stadler, M., v243 (MP129)  
 Stahl, R.A.K., v15 (SO36)  
 Stallone, C., v332 (MP397)  
 Stallone, G., v4 (SO04), v158 (SP416), v160 (SP423), v203 (MP002)

- Stamatelou, K., v315 (MP343)  
 Stamatov, L., v116 (SP289)  
 Stancu, S., v267 (MP201)  
 Stanescu, C., v230 (MP088), v287 (MP259)  
 Stangou, M., v30 (SP033)  
 Stathakis, C., v349 (MP447)  
 Stathakis, P., v43 (SP072)  
 Stauber, R.E., v117 (SP292)  
 Stavroulaki, E., v119 (SP299), v289 (MP266),  
 v290 (MP268)  
 Steciwko, A., v131 (SP334), v132 (SP336),  
 v319 (MP356)  
 Steedman, T., v299 (MP293)  
 Stefan, V., v177 (SP474)  
 Stefaniak, E., v127 (SP321)  
 Stefanovic, N., v22 (SP007)  
 Stefanska, A., v76 (SP170)  
 Steffen Jürgensen, J., v16 (SO39)  
 Steffen Jurgensen, J., v54 (SP104)  
 Stefikova, K., v87 (SP203)  
 Stein, G., v75 (SP168), v81 (SP187),  
 v82 (SP189), v354 (MP463)  
 Steinbeck, P., v115 (SP288)  
 Steiner, A., v81 (SP187)  
 Stejkal, J., v220 (MP056)  
 Stejskalová, A., v220 (MP056)  
 Stekrova, J., v72 (SP160), v248 (MP144)  
 Stenvinkel, P., v78 (SP177), v83 (SP192),  
 v84 (SP193), v99 (SP237), v130 (SP331),  
 v137 (SP351), v309 (MP324),  
 v312 (MP332)  
 Stevens, P.E., v50 (SP091), v66 (SP142),  
 v287 (MP260)  
 Stigant, C.E., v329 (MP386)  
 Stirling, C.M., v268 (MP202)  
 Stocks, F., v96 (SP230)  
 Stoelcker, B., v21 (SP006)  
 Stoffel, M.P., v97 (SP232), v322 (MP365),  
 v326 (MP377)  
 Stojanov, S., v16 (SO37)  
 Stojanovic, M., v132 (SP337)  
 Stojcev, N., v95 (SP228)  
 Stojceva-Taneva, O., v116 (SP289),  
 v310 (MP327)  
 Stokowska, W., v324 (MP371)  
 Stolova, M., v70 (SP152)  
 Stolyarevich, E.S., v173 (SP464)  
 Stompor, T., v309 (MP325)  
 Stosovic, M., v253 (MP159)  
 Strandjord, R.E., v128 (SP326)  
 Stratopoulos, C., v3 (SO03)  
 Stratta, P., v356 (MP467), v366 (MP497)  
 Streffer, K., v28 (SP025)  
 Strippoli, G.F.M., v137 (SP352),  
 v202 (MO43), v229 (MP084),  
 v336 (MP408), v338 (MP414),  
 v355 (MP464)  
 Strojek, K., v235 (MP105)  
 Strotmann, J., v246 (MP139)  
 Strózecki, P., v76 (SP170)  
 Strozecki, P., v59 (SP119)  
 Struijk, D.G., v200 (MO37)  
 Strutz, F., v27 (SP023), v206 (MP010)  
 Strzelczyk, P., v282 (MP1243)  
 Study Group, M., v264 (MP193)  
 Study Group, P., v78 (SP176), v190 (MO09)  
 Stuebinger, A., v224 (MP070)  
 Stummvoll, H.K., v89 (SP209)  
 Sturrock, N., v242 (MP128)  
 Su Kim, Y., v222 (MP061), v284 (MP248)  
 Subaric Gorgieva, G., v321 (MP362)  
 Suc, B., v45 (SP076), v64 (SP137)  
 Sucu, A., v351 (MP452)  
 Suesal, C., v160 (SP424)  
 Sugisaki, T., v309 (MP324), v318 (MP353)  
 Sugiura, J., v20 (SP002)  
 Sugiyama, S., v170 (SP454), v214 (MP035),  
 v316 (MP347)  
 Suh, K.-S., v53 (SP102), v284 (MP248)  
 Suk Han, D., v240 (MP120)  
 Suk Han, J., v222 (MP061), v236 (MP109),  
 v284 (MP248)  
 Suk Kim, H., v231 (MP091)  
 Suk Seo, J., v226 (MP074)  
 Sukhanov, A.V., v173 (SP464)  
 Suleymanlar, G., v311 (MP330),  
 v312 (MP333), v356 (MP468)  
 Sulikowski, T., v182 (SP490)  
 Suliman, M., v312 (MP332)  
 Suliman, M.E., v83 (SP192), v84 (SP193),  
 v99 (SP237)  
 Sulkova, S., v115 (SP288), v330 (MP390)  
 Sulowicz, W., v88 (SP207), v135 (SP345),  
 v270 (MP208), v303 (MP307),  
 v305 (MP312), v309 (MP325)  
 Sumethkul, V., v252 (MP156)  
 Summaria, F., v298 (MP290)  
 Sunder-Plassmann, G., v10 (SO20),  
 v248 (MP143)  
 Sung, J.-M., v320 (MP359)  
 Surel, S., v63 (SP133), v241 (MP125)  
 Süsal, C., v11 (SO24)  
 Sut, N., v61 (SP128)  
 Suwelack, B., v253 (MP160)  
 Suzuki, H., v347 (MP440)  
 Svoboda, L., v220 (MP056)  
 Svobodová, D., v220 (MP056)  
 Swatowski, A., v148 (SP385)  
 Sytew, H.-K., v215 (MP039)  
 Szabó, J., v180 (SP485)  
 Szaj, M., v73 (SP162)  
 Szary, B., v352 (MP456)  
 Szczepanska, M., v124 (SP313), v127 (SP323)  
 Szczerbo-Trojanowska, M., v148 (SP385)  
 Szentkirályi, A., v68 (SP146)  
 Szewieczek, J., v282 (MP243)  
 Szklarek, M., v138 (SP353)  
 Szollosi, I., v325 (MP376)  
 Szprynger, K., v124 (SP313), v127 (SP323)  
 Szuflet, A., v224 (MP068), v225 (MP071)  
 Szurawska, E., v101 (SP245)  
 Szyber, P., v156 (SP410), v179 (SP480)  
 Szychot, E., v210 (MP022)  
 Szydłowska, I., v235 (MP105)
- T**
- Taal, M.W., v69 (SP151), v119 (SP298),  
 v222 (MP062), v340 (MP419, MP420)  
 Tabel, Y., v32 (SP038, SP039), v33 (SP042)  
 Tabor, B., v309 (MP325)  
 Taborsky, P., v145 (SP375), v146 (SP380),  
 v151 (SP393)  
 Taccola, D., v28 (SP028), v75 (SP167),  
 v162 (SP431)  
 Taccone Gallucci, M., v105 (SP256)  
 Taccone-Gallucci, M., v129 (SP329),  
 v298 (MP290)  
 Taek Lee, G., v201 (MO40)  
 Tafuri, A., v232 (MP096)  
 Tagliavini, D., v331 (MP391)  
 Taher Esfahani, S., v64 (SP136),  
 v232 (MP095)  
 Taheri Mahmoud, M., v364 (MP493)  
 Taheri Mahmoudi, M., v161 (SP426),  
 v171 (SP458), v249 (MP147)  
 Taira, T., v93 (SP222), v108 (SP267)  
 Takada, K., v276 (MP225)  
 Takahashi, H., v37 (SP052), v316 (MP347)  
 Takahashi, K., v170 (SP454), v214 (MP035),  
 v316 (MP347)  
 Takahashi, S., v129 (SP327)  
 Takahira, S., v347 (MP440)  
 Takami, A., v205 (MP009)  
 Takane, H., v347 (MP440)  
 Takemura, T., v93 (SP222), v108 (SP267)  
 Takeuchi, T., v163 (SP434), v215 (MP040)  
 Takoudas, D., v83 (SP191)  
 Takouli, L., v115 (SP287), v301 (MP301)  
 Talim, B., v217 (MP046)  
 Tallum, S., v264 (MP192)  
 Tam, P., v349 (MP447)  
 Tamaskó, M., v267 (MP200), v306 (MP316)  
 Tangelder, G.-J., v123 (SP311), v124 (SP312)  
 Tanihata, Y., v208 (MP017)  
 Tanju, S., v147 (SP382)  
 Tansinda, P., v331 (MP391)  
 Tarrass, F., v101 (SP246)  
 Tarroni, A., v374 (TO09)  
 Taskaya, G., v335 (MP405)  
 Tasker, A., v105 (SP257)  
 Tasorian, B., v284 (MP250)  
 Tatsis, E., v122 (SP306)  
 Tavares, I., v166 (SP442), v247 (MP140)  
 Taylor, J., v271 (MP210)  
 Tazon, B., v245 (MP136)  
 Tazón-Vega, B., v244 (MP132)  
 Teatini, U., v259 (MP177)  
 Tedesco, M., v129 (SP329), v298 (MP290)  
 Tedgui, A., v18 (SO42), v299 (MP294)  
 Tee, M.M., v374 (TO11)  
 Tekgunduz, E., v184 (SP495)  
 ten Dam, M.A.G.J., v74 (SP164)  
 Tencer, J., v231 (MP092)  
 Tenorio, M.T., v286 (MP255)  
 Tepel, M., v28 (SP025), v74 (SP166),  
 v96 (SP230)  
 Teplan, V., v9 (SO19), v34 (SP044),  
 v70 (SP152)  
 Teresa Antonucci, M., v205 (MP008)  
 Teresa Gandolfo, M., v204 (MP005)  
 Teresa Gil, M., v86 (SP200)  
 Teresa Muratore, M., v106 (SP262)  
 Terrier, N., v136 (SP349), v249 (MP146),  
 v298 (MP291)  
 Terry, F., v65 (SP139)  
 Terziyska, N., v352 (MP455)  
 Tesar, V., v130 (SP332), v151 (SP395),  
 v220 (MP056), v233 (MP099),  
 v244 (MP131)  
 Tesch, G.H., v374 (TO11)  
 Testa, A., v295 (MP284)  
 Testa, S., v75 (SP169)  
 Testasecca, D., v365 (MP494)  
 Tettamanzy, F.M., v217 (MP045)  
 Teutonico, A., v155 (SP408), v165 (SP438),  
 v359 (MP478)  
 Thaïss, F., v15 (SO36)  
 the ERCB-Consortium, F., v371 (TO01)  
 Thebotareva, N.V., v27 (SP024)  
 Theodoridis, T.G., v127 (SP322)  
 Theodorou, J., v115 (SP287)  
 Thomaidis, S., v128 (SP325)

- Thomas, H., v366 (MP499)  
 Thomas, K., v82 (SP189), v190 (MO10), v366 (MP499)  
 Thomas, M.F., v175 (SP469)  
 Thompson, C.R., v140 (SP360)  
 Thompson, L., v282 (MP244)  
 Tiboldo, R., v28 (SP027), v203 (MP003)  
 Tidman, M., v64 (SP135)  
 Tiegs, G., v214 (MP036)  
 Timio, F., v281 (MP240)  
 Timio, M., v281 (MP240)  
 Timokhovskaya, G.Y., v316 (MP346)  
 Titze, J., v22 (SP009), v42 (SP069)  
 Tiwari, S.C., v323 (MP369), v360 (MP480)  
 Tochigi, S., v102 (SP248)  
 Toda, N., v126 (SP318), v351 (MP454)  
 Tokgöz, B., v110 (SP273)  
 Tokieda, T., v205 (MP009)  
 Tola, Y., v351 (MP452)  
 Tolaini, P., v191 (MO13)  
 Tole, N., v351 (MP452)  
 Tomassini, M., v105 (SP256)  
 Tombul, Z., v114 (SP285)  
 Tomer, A., v317 (MP350)  
 Tomicic, V., v47 (SP084)  
 Tomilina, N.A., v173 (SP464), v275 (MP223)  
 Tominaga, Y., v80 (SP183)  
 Tomita, M., v170 (SP454), v214 (MP035), v316 (MP347)  
 Tomiyama, C., v105 (SP258), v189 (MO08)  
 Tomosugi, N., v276 (MP226)  
 Tomyiama, C., v276 (MP227)  
 Tonbul, H.Z., v325 (MP374)  
 Tondelli, G., v103 (SP250)  
 Topal, T., v212 (MP029, MP030)  
 Topallar, F., v346 (MP437)  
 Topchiy, I.I., v236 (MP107)  
 Toprak, O., v48 (SP087)  
 Torffvit, O., v231 (MP092)  
 Török, S., v180 (SP485)  
 Toronyi, E., v180 (SP485)  
 Torra, R., v244 (MP132), v245 (MP136)  
 Torras, J., v20 (SP003), v157 (SP415), v194 (MO22)  
 Torregrosa, E., v347 (MP442)  
 Torregrosa, I., v106 (SP261)  
 Torregrossa, R., v245 (MP135)  
 Torremans, A., v114 (SP284)  
 Torres, A., v92 (SP218)  
 Torres, D., v218 (MP050), v229 (MP084)  
 Torri, C., v155 (SP409)  
 Torun, D., v138 (SP355), v297 (MP289)  
 Torun, N., v138 (SP355)  
 Toso, E., v245 (MP135)  
 Toth, A., v150 (SP390)  
 Tóth, T., v138 (SP354)  
 Toubreau, G., v46 (SP079)  
 Toubiana, L., v212 (MP031)  
 Tovbin, D., v117 (SP293), v253 (MP158), v317 (MP350)  
 Töz, H., v111 (SP276), v168 (SP450), v182 (SP489), v358 (MP475)  
 Toz, H., v181 (SP486)  
 Tozija, L., v310 (MP327)  
 Trabelus, S., v330 (MP389)  
 Tracz, W., v303 (MP307), v305 (MP312), v309 (MP325)  
 Traeger, J., v26 (SP019), v137 (SP350), v333 (MP399)  
 Trafidlo, E., v149 (SP388)  
 Trajkovic, G., v321 (MP362)  
 Tramonti, G., v28 (SP028), v288 (MP262)  
 Trauner, M., v117 (SP292), v372 (TO04)  
 Trautsolt, W., v235 (MP105)  
 Traver, J.A., v332 (MP396)  
 Trebicka, J., v80 (SP184)  
 Trefil, L., v297 (#)  
 Triantafylis, G., v290 (MP267), v315 (MP343)  
 Tripepi, G., v38 (SP057), v75 (SP169), v174 (SP465, SP466), v295 (MP284), v301 (MP300), v306 (MP314, MP315)  
 Tripepi, R., v306 (MP315)  
 Tripodi, G., v371 (TO02)  
 Trivelloni, C., v121 (SP303)  
 Trouchmanov, R.S., v362 (MP485)  
 Trpeski, L., v9 (SO18)  
 Trullas, J.C., v339 (MP416)  
 Tsai, J.-C., v58 (SP115)  
 Tsai, T.-J., v268 (MP203)  
 Tsakiris, D., v31 (SP035), v265 (MP194), v274 (MP219), v349 (MP447)  
 Tseke, P., v57 (SP114), v241 (MP123)  
 Tseng, C.-C., v320 (MP359)  
 Tsiandoulas, A., v110 (SP272), v111 (SP277)  
 Tsikas, D., v240 (#)  
 Tsinoglou, K., v77 (SP174)  
 Tsinta, A., v152 (SP399)  
 Tsiroglou, E., v290 (MP268)  
 Tsiropanlis, G., v290 (MP267), v315 (MP343)  
 Tsouchnikas, I., v31 (SP035), v265 (MP194), v274 (MP219)  
 Tsubakihara, Y., v256 (MP170)  
 Tsunoda, T., v76 (SP171)  
 Ttareef, N., v340 (MP418)  
 Tuca, I., v314 (MP340)  
 Tugay, S., v60 (SP122)  
 Tugdi, S., v109 (SP270)  
 Tuglular, S., v35 (SP047), v229 (MP085), v352 (MP457)  
 Tugrul Sezer, M., v61 (SP126)  
 Tukaguchi, H., v353 (MP459)  
 Tulissi, P., v11 (SO23), v358 (MP474)  
 Tulmac, M., v111 (SP275)  
 Tunc, N., v219 (MP053)  
 Tuncali, T., v219 (MP054)  
 Tuncer, M., v15 (SO34), v277 (MP228), v311 (MP330), v312 (MP333), v355 (MP466), v356 (MP468)  
 Turcato, S., v29 (SP031), v32 (SP040), v33 (SP041), v158 (SP417), v210 (MP025)  
 Turello, E., v356 (MP467)  
 Turgan, C., v8 (SO14), v26 (SP021), v62 (SP129), v191 (MO12), v304 (MP310), v305 (MP311)  
 Turk, S., v325 (MP374)  
 Turkcappar, N., v219 (MP054)  
 Turker, F., v279 (MP234)  
 Turki, S., v285 (MP253)  
 Turkmen, F., v182 (SP491)  
 Turkmen, M., v208 (MP018)  
 Turkmen, M.A., v227 (MP077, MP078)  
 Turkoglu, S., v131 (SP333, SP335)  
 Turner, S., v89 (SP210)  
 Turri, O., v103 (SP251)  
 Tuta, L.V., v73 (SP161)  
 Tural, E., v131 (SP333, SP335), v266 (MP198)  
 Tutar, E., v60 (SP124)  
 Tuzuner, A., v147 (SP382)  
 Twehues, L., v196 (MO26)  
 Tykarski, A., v58 (SP116)  
 Tylicki, L., v59 (SP119)  
 Tyszkowski, S., v59 (SP119)  
 Tziraki, A.A., v34 (SP046)  
 Tzirakis, M.A., v34 (SP046)
- ## U
- Ucar, T., v60 (SP124)  
 Uccello, F., v52 (SP099)  
 Ueda, A., v276 (MP225)  
 Uemura, K., v228 (MP080)  
 Uggeri, S., v274 (MP220)  
 Ugur Yalcin, A., v134 (SP343)  
 Ugurlu, H., v325 (MP374)  
 Ujhelyi, L., v109 (SP271)  
 Uk Kwon, S., v146 (SP378), v323 (MP368)  
 Ullmann, M., v100 (SP243)  
 Ungaro, N., v139 (SP358)  
 Ungureanu, D., v238 (MP115)  
 Ungureanu, G., v125 (SP316)  
 Unver, S., v144 (SP371), v346 (MP437)  
 Unwin, R.J., v29 (SP030)  
 Uppenkamp, M., v6 (SO09), v100 (SP243)  
 Ural, D., v301 (MP299)  
 Urbani, A., v117 (SP294)  
 Urbaniak, J., v156 (SP410)  
 Urena, P., v80 (SP183), v89 (SP210)  
 Urquilla, P., v195 (MO24)  
 Ursea, N., v272 (MP215)  
 Ursi, M., v4 (SO04), v163 (SP433)  
 Uruc, I., v45 (SP078)  
 Urun, Y., v315 (MP344)  
 Urzua, J.C., v41 (SP065)  
 Uscatescu, V., v228 (MP081)  
 Uslu, Y., v133 (SP338)  
 Ustundag, S., v61 (SP128), v254 (MP162)  
 Usuda, N., v170 (SP454)  
 Utas, C., v110 (SP273), v130 (SP330), v349 (MP447)  
 Uthoff, S., v115 (SP288)  
 Utz, J., v118 (SP295)  
 Uwe, K., v175 (SP469)  
 Uyar, M., v162 (SP429)  
 Uysal, S., v273 (MP217)  
 Uzum, A., v48 (SP087)  
 Uzun, H., v160 (SP422)  
 Uzun, K., v317 (MP349)
- ## V
- Vakina, T.N., v134 (SP341)  
 Valdes, C., v337 (MP409)  
 Valdés, F., v342 (MP424)  
 Valek, M., v145 (SP375)  
 Valente, M., v155 (SP407)  
 Valentino, R., v296 (MP286)  
 Valenzuela, M.P., v302 (MP303)  
 Vallone, C., v358 (MP474)  
 Vamvakari, P., v290 (MP267), v315 (MP343)  
 Van Biesen, W., v342 (MP426)  
 van Buren, M., v74 (SP164), v258 (MP175)  
 van de Ven, P.J., v74 (SP164)  
 van der Kemp, A.W.C.M., v199 (MO36)  
 Van der Niepen, P., v6 (SO11), v44 (SP074)  
 van der Sman-de Beer, F., v373 (TO07)  
 van der Woude, F.J., v159 (SP421)  
 van Manen, J.G., v78 (SP176), v190 (MO09), v258 (MP175), v303 (MP305)  
 Van Roeyen, C., v8 (SO15)  
 van Schalkwyk, D., v337 (MP411)  
 Van Vlymen, J., v287 (MP260)  
 van Zuilen, A.D., v74 (SP164)



- Vanholder, R., v45 (#), v46 (#), v114 (SP284), v218 (MP048), v280 (MP237), v293 (MP277), v294 (MP278), v314 (MP339), v334 (MP401), v339 (MP415)
- Vankova, Z., v233 (MP099)
- Vannucchi, H., v108 (SP266)
- Vannucchi, M.T.I., v108 (SP266)
- Vanrenterghem, Y., v13 (SO30), v14 (SO31), v66 (SP141), v335 (MP403), v372 (TO03)
- Vanrenterghem, Y.F., v163 (SP432)
- Vaqueiro, M., v65 (SP138)
- Varakis, I., v16 (SO38)
- Varga, Z., v109 (SP271), v325 (MP376), v326 (MP378)
- Vargas, M., v47 (SP084)
- Varma, P.P., v178 (SP479)
- Vas, T., v138 (SP354)
- Vasileiou, E., v152 (SP399)
- Vasilijic, S.R., v216 (MP043)
- Vaslaki, L., v138 (SP354), v336 (MP406)
- Vatazin, A.V., v362 (MP485)
- Vaz, A., v286 (MP258)
- Veelken, R., v69 (SP149), v214 (MP036)
- Vekaria, R.M., v29 (SP030)
- Vela, E., v173 (SP462), v295 (MP282), v302 (MP303), v308 (MP320)
- Venerito, P., v116 (SP290)
- Venettoni, S., v365 (MP494)
- Venning, M., v72 (SP158)
- Vera-Sempere, F.J., v360 (MP479)
- Verbeke, K., v66 (SP141), v163 (SP432)
- Verdonck, P., v114 (SP284), v339 (MP415)
- Veres, Z., v264 (MP192)
- Vernaglione, L., v36 (SP050), v58 (SP117), v142 (SP366)
- Vernhet, H., v112 (SP279)
- Verpont, M.-C., v211 (MP027)
- Verrienti, R., v160 (SP423), v163 (SP433)
- Verrina, E., v342 (MP425)
- Vervoort, G., v74 (SP164)
- Verzola, D., v204 (MP005)
- Vezzoli, G., v245 (MP135)
- Vianello, D., v155 (SP407)
- Vianna, L., v151 (SP394)
- Vicent, C., v272 (MP213)
- Vicente Torregrosa, J., v6 (SO10), v97 (SP233)
- Victoria Alvarez-Arroyo, M., v196 (MO25)
- Vidal, A., v157 (SP415)
- Vigilante, M., v332 (MP397)
- Vijt, D., v342 (MP426)
- Viklicky, O., v72 (SP160)
- Vikram, R., v280 (MP239)
- Vikrant, S., v323 (MP369)
- Vikulova, O.K., v239 (#)
- Vila, J., v375 (TO12)
- Viladoms, J., v143 (SP367)
- Vilardell, M., v245 (MP136)
- Vilaró, S., v375 (TO12)
- Villa, G., v260 (MP181), v261 (MP183), v263 (MP190)
- Villa, L., v197 (MO29), v208 (MP016)
- Villafruela, J.J., v169 (SP451), v367 (MP502)
- Villaggio, B., v204 (MP005)
- Villar, M., v144 (SP372)
- Villar, M.J., v232 (MP094)
- Villaverde, M., v90 (SP211)
- Villaverde, P., v135 (SP346), v342 (MP424)
- Vinhas, J., v286 (MP258)
- Vinogradova, L.Y., v316 (MP346)
- Virgilio, M., v116 (SP290)
- Vischini, G., v136 (SP347)
- Visvardis, G., v346 (MP438), v354 (MP461)
- Viswalingam, A., v254 (MP164)
- Vitko, S., v9 (SO19)
- Vlachoianis, J.G., v228 (MP083), v349 (MP447)
- Vladimir, T., v177 (SP474), v278 (MP231)
- Vladimirsky, M.A., v362 (MP485)
- Vlahov, J.D., v286 (MP257)
- Vlajkovic, S., v22 (SP007)
- Vlassopoulos, D.A., v343 (MP428), v363 (MP488, MP489)
- Vlatkovic, V., v115 (SP288)
- Vleming, L., v74 (SP164)
- Vocaturu, G., v141 (SP361)
- Vogel, A.A., v41 (SP065)
- Voiculescu, A., v183 (SP494), v327 (MP381)
- Voiculescu, M.M., v77 (SP175), v228 (MP081), v286 (MP256)
- Voinea, F.I., v73 (SP161)
- Volovat, C., v223 (MP067)
- Volpi, N., v22 (SP009)
- von Harten, B., v335 (MP404)
- Voormolen, N., v78 (SP176), v190 (MO09)
- Vora, J., v237 (MP110)
- Vucevic, D.B., v216 (MP043)
- Vujkovic, B., v267 (MP199)
- Vukicevic, S., v95 (SP226)
- Vukobradovic, I., v199 (MO35)
- Vural, A., v18 (SO43), v168 (SP448), v171 (SP457), v212 (MP029, MP030), v317 (MP351)
- W**
- Wada, J., v126 (SP318), v351 (MP454)
- Wagner, C.A., v187 (MO03)
- Wagner, K.-K., v240 (#)
- Wagner, L., v267 (MP200)
- Wagner, M., v345 (MP433)
- Wagner, Z., v138 (SP354), v267 (MP200), v306 (MP316)
- Wakahara, S., v242 (MP126)
- Wakai, H., v108 (SP267)
- Waldek, S., v10 (SO21)
- Walden, M., v14 (SO33), v20 (SP001), v158 (SP418)
- Waldhauser, F., v25 (SP018)
- Wali, R.K., v165 (SP440)
- Walker, M., v287 (MP260)
- Walker, P.D., v223 (MP066)
- Walker, R., v90 (SP212), v258 (MP176)
- Wallace, S.A., v336 (MP408), v338 (MP414)
- Wan Kim, S., v35 (SP048)
- Wang, P., v14 (SO32)
- Wang, X., v130 (SP331), v137 (SP351)
- Wanic-Kossowska, M., v344 (MP430)
- Waniewski, J., v348 (MP444)
- Wankowicz, Z., v88 (SP207), v285 (MP254), v348 (MP444)
- Wanner, C., v54 (SP105), v246 (MP139), v335 (MP404)
- Ward, M., v65 (SP139)
- Ward, R.A., v118 (SP295)
- Warnecke, C., v54 (SP104)
- Warnock, D., v10 (SO21)
- Warzywoda, A., v127 (SP321)
- Watanabe, M., v312 (MP332)
- Watson, A.W., v363 (MP490), v367 (MP501)
- Watson, R.W.G., v205 (MP007)
- Wauters, J.-P., v346 (MP436)
- Webb, A., v142 (SP364), v145 (#), v148 (SP384)
- Weber, C., v29 (SP029)
- Webster, I., v376 (TO14)
- Weglarska, J., v62 (SP130)
- Weidemann, A., v16 (SO39), v54 (SP104)
- Weidemann, F., v246 (MP139)
- Weigert, A., v12 (SO27)
- Weijnen, T.J.G., v67 (SP145)
- Weimer, R., v160 (SP424)
- Weinhandl, E.D., v7 (SO13)
- Weinman, E.J., v187 (MO03)
- Weissgarten, J., v39 (SP059), v204 (MP006), v294 (MP279)
- Wellard, M.R., v54 (SP103)
- Wentworth, C., v103 (SP253)
- Werynski, A., v353 (MP460)
- Wesolowska, A., v183 (SP492)
- Westeel, P.-F., v167 (SP444)
- Westenfeld, R., v13 (SO29), v16 (SO37), v105 (SP257)
- Westlie, L., v365 (MP496)
- Weszelits, V., v180 (SP485)
- Wetzels, J.F.M., v74 (SP164)
- Weyde, W., v149 (SP388)
- Wha Kang, E., v126 (SP319)
- Wheatley, R., v123 (SP309)
- Whee Park, C., v235 (MP106)
- Whiteside, C.I., v23 (SP011)
- Whitley, C., v10 (SO21)
- Whittaker, L., v237 (MP110)
- Whybra, C., v10 (SO20)
- Widmer, U., v248 (MP143)
- Wiecek, A., v8 (SO16), v55 (SP106), v170 (SP453), v175 (SP468), v193 (MO17), v195 (MO24), v344 (MP431)
- Wierzbicki, P., v156 (SP411), v285 (MP254)
- Wiese, P., v152 (SP397)
- Wiesener, M., v16 (SO39)
- Wiesener, M.S., v54 (SP104)
- Wilcox, W., v10 (SO21)
- Wilczynska-Borawska, M., v324 (MP371)
- Wilkie, M., v89 (SP209), v263 (MP190)
- Will, E.J., v123 (SP309)
- William, C., v54 (SP104)
- Williams, J., v54 (SP103)
- Williams, L., v88 (SP207), v89 (SP208)
- Wilmer, A., v335 (MP403), v372 (TO03)
- Winkelmayer, W.C., v243 (MP130)
- Wisniewska, M., v73 (SP162), v168 (SP449), v182 (SP490)
- Wisniewski, A., v159 (SP420)
- Wiswedel, I., v133 (SP339)
- Witkowicz, J., v344 (MP431)
- Witkowski, J., v352 (MP455)
- Witkowski, J.M., v33 (SP043)
- Witt, M., v222 (MP064)
- Wittke, S., v14 (SO33), v20 (SP001), v158 (SP418), v251 (MP153)
- Wittmann, I., v235 (MP104), v267 (MP200), v306 (MP316)
- Wloszczynska, E., v193 (MO17)
- Wohlfart, S., v41 (SP066)
- Wojke, R., v122 (SP306), v336 (MP406)
- Wolf, G., v75 (SP168)
- Wolff, V., v232 (MP094)
- Won Chang, J., v274 (MP221)
- Won Lee, D., v211 (MP026)
- Won Lee, S., v134 (SP342), v226 (MP075), v298 (MP292)
- Won Seo, J., v234 (MP101)

- Wong, V., v363 (MP490), v367 (MP501)  
 Woo Lee, S., v134 (SP342), v226 (MP075),  
 v298 (MP292)  
 Woo Yang, C., v53 (SP100), v144 (SP374)  
 Wood, G.A., v199 (MO35)  
 Wook Joo, K., v236 (MP109), v284 (MP248)  
 Wook Lee, J., v236 (MP109), v284 (MP248)  
 Wook Lee, K., v284 (MP249)  
 Wook Yun, Y., v237 (MP111)  
 Wozniak, A., v241 (MP122)  
 Wozniak, M., v156 (SP410)  
 Wrenger, E., v233 (MP098)  
 Wright, M., v123 (SP309)  
 Wu, A.-B., v320 (MP359)  
 Wu, C.-C., v215 (MP039)  
 Wu, D., v194 (MO21)  
 Wu, G.G., v349 (MP447)  
 Wu, M.-Y., v157 (SP413)  
 Wuthrich, R.P., v88 (SP205)  
 Wystrychowski, G., v175 (SP468)  
 Wyzgal, J., v156 (SP411)
- X**
- Xanthopoulou, K., v274 (MP219)  
 Xavier, P., v166 (SP442), v213 (MP034)  
 Xie, Y., v194 (MO21)  
 Xue, J., v376 (TO16)  
 Xydakis, D., v62 (SP131), v238 (MP113)
- Y**
- Yaari, A., v253 (MP158)  
 Yagüe, S., v196 (MO25)  
 Yajima, A., v80 (SP183)  
 Yakupoglu, G., v15 (SO34), v277 (MP228),  
 v311 (MP330), v312 (MP333),  
 v355 (MP466), v356 (MP468)  
 Yakupoglu, U., v349 (MP447)  
 Yalcinkaya, F., v60 (SP124), v346 (MP439)  
 Yamabe, H., v254 (MP163)  
 Yamakawa, K., v103 (SP252)  
 Yamakawa, T., v103 (SP252), v373 (TO08)  
 Yamamoto, T., v52 (SP097, SP098)  
 Yaman, H., v212 (MP029, MP030)  
 Yamanouchi, Y., v347 (MP440)  
 Yamaya, H., v276 (MP226)  
 Yan Lin, S., v376 (TO16)  
 Yang, I.-F., v294 (MP281)  
 Yang, J.-O., v331 (MP393)  
 Yang, T.-F., v294 (MP281)  
 Yang, W.-C., v141 (SP362)  
 Yano, A., v126 (SP318), v351 (MP454)  
 Yano, Y., v21 (SP005)  
 Yard, B., v159 (SP421)  
 Yasavul, U., v26 (SP021), v304 (MP310),  
 v305 (MP311)  
 Yassin, Y.S., v308 (MP321)  
 Yasuda, Y., v371 (TO01)  
 Yavaskan, Ö., v285 (MP252)  
 Yavuz, A., v15 (SO34), v59 (SP121),  
 v277 (MP228), v311 (MP330),  
 v312 (MP333), v333 (MP398),  
 v355 (MP466), v356 (MP468)  
 Yavuz, M., v349 (MP447)  
 Yazici, C., v48 (SP087), v110 (SP273),  
 v130 (SP330)  
 Yeghnazar, H., v264 (MP191)  
 Yeksan, M., v325 (MP374)  
 Yekta, Z., v167 (SP445)  
 Yenicesu, M., v171 (SP457), v212 (MP029,  
 MP030)  
 Yenisey, C., v250 (MP150)  
 Yeol Lee, D., v30 (SP034)  
 Yeol Park, J., v234 (MP101)  
 Yeon Seo, J., v12 (SO26), v157 (SP414),  
 v207 (MP013)  
 Yesil, M., v48 (SP087)  
 Yeung, L.-K., v79 (SP180)  
 Yigit, B., v182 (SP491)  
 Yigitler, C., v171 (SP457)  
 Yildirim, S., v346 (MP437)  
 Yildiz, S., v47 (SP082), v160 (SP424),  
 v208 (MP018)  
 Yilmaz, A., v139 (SP356), v301 (MP299),  
 v324 (MP370)  
 Yilmaz, A.Y., v351 (MP452)  
 Yilmaz, F., v181 (SP486)  
 Yilmaz, M.E., v24 (SP013), v349 (MP447)  
 Yilmaz, O., v38 (SP056)  
 Yilmaz, R., v26 (SP021), v191 (MO12),  
 v304 (MP310), v305 (MP311)  
 Yokoyama, T., v94 (SP224)  
 Yoo, S.-J., v343 (MP429)  
 Yoo, T.-H., v310 (MP326, MP328),  
 v311 (MP331)  
 Yoon, K.-I., v92 (SP216)  
 Yoon, K., v348 (MP443)  
 Yoshida, K., v93 (SP222)  
 Yoshimura, M., v37 (SP052)  
 Young, B., v248 (MP145)  
 Young Choi, H., v310 (MP326, MP328),  
 v311 (MP331)  
 Young Kim, S., v113 (SP283), v144 (SP374),  
 v235 (MP106)  
 Young Lee, H., v284 (MP249)  
 Young Lhee, H., v104 (SP255)  
 Young Na, K., v236 (MP109)  
 Ytterberg, S.R., v187 (MO02)  
 Yu, H.-T., v143 (SP370), v325 (MP375)  
 Yu, Q., v14 (SO32)  
 Yu, S.-H., v343 (MP429)  
 Yu Galchinskaya, V., v236 (MP107)  
 Yu Shvetsov, M., v72 (SP159)  
 Yu Zhu, Q., v376 (TO16)  
 Yu Zhu, W., v203 (MP001)  
 Yucel, A., v67 (SP144), v155 (SP406)  
 Yuh Guh, J., v210 (MP024)  
 Yuksel, C., v279 (MP234)  
 Yuksel, S., v60 (SP124), v155 (SP406)  
 Yun Lai, L., v203 (MP001)  
 Yung Lee, H., v126 (SP319), v240 (MP120),  
 v310 (MP326, MP328), v311 (MP331)  
 Yver, L., v262 (MP186)  
 Yvon, L., v161 (SP428)
- Z**
- Zabka, J., v220 (MP056)  
 Zacchello, G., v342 (MP425)  
 Zacharogiannis, Ch., v116 (SP291),  
 v119 (SP299), v289 (MP266),  
 v290 (MP268)  
 Zachwieja, J., v127 (SP321), v222 (MP064)  
 Zafirovska, K., v116 (SP289), v231 (MP090),  
 v310 (MP327)  
 Zagorski, Z., v315 (MP342)  
 Zagradisnik, B., v295 (MP283)  
 Zahn, M., v122 (SP306)  
 Zaid, D., v101 (SP246)  
 Zakiyanov, O., v145 (SP375)  
 Zaklyazminskaya, E., v69 (SP150)  
 Zaluska, W., v148 (SP385)  
 Zamd, M., v101 (SP246)  
 Zamojska, S., v138 (SP353)  
 Zamora, I., v360 (MP479)  
 Zamora, J., v169 (SP451)  
 Zanazzi, M., v368 (MP503)  
 Zanchetta, J.R., v86 (SP199)  
 Zani, V., v89 (SP209, SP210), v197 (MO30)  
 Zaniw, M., v127 (SP321), v222 (MP064)  
 Zanzani, C., v47 (SP085)  
 Zavada, J., v233 (MP099)  
 Zavala-Sánchez, A., v349 (MP448)  
 Zaza, G., v214 (MP037)  
 Zbigniew, Z., v233 (MP097)  
 Zdrojewski, Z., v60 (SP123), v101 (SP245)  
 Zdychova, J., v34 (SP044)  
 Zecher, D., v196 (MO27)  
 Zeier, M., v292 (MP274)  
 Zelenitsky, S.A., v319 (MP354)  
 Zeltner, R., v245 (MP134)  
 Zemtchenkov, A.Y., v316 (MP346)  
 Zepf, K., v224 (MP070)  
 Zerbi, S., v257 (MP173), v372 (TO06)  
 Zeromski, J., v216 (MP044)  
 Zerva, A., v116 (SP291), v119 (SP299),  
 v289 (MP266), v290 (MP268)  
 Zhang, X., v194 (MO21)  
 Zhang Liu, S., v14 (SO32)  
 Zhao, Z., v74 (SP166)  
 Zhou, F., v74 (SP166)  
 Zhu, F., v113 (SP281)  
 Zhu, N., v9 (SO18)  
 Zhu, Z., v28 (SP025), v74 (SP166)  
 Ziai, F., v292 (MP272)  
 Ziakka, S., v126 (SP317)  
 Zibar, L., v348 (MP446)  
 Zidovska, J., v248 (MP144)  
 Ziebart, H., v37 (SP054), v38 (SP055)  
 Zilleruelo, G., v150 (SP391)  
 Zilvetti, M., v3 (SO03)  
 Zima, T., v130 (SP332)  
 Zivkovic, V., v22 (SP007)  
 Zizza, T., v139 (SP358)  
 Zlotnik, M., v117 (SP293), v253 (MP158),  
 v317 (MP350)  
 Znojova, M., v330 (MP390)  
 Zoccali, C., v38 (SP057), v75 (SP169),  
 v174 (SP465), v295 (MP284),  
 v301 (MP300), v306 (MP314, MP315)  
 Zoccali, C., v174 (SP466)  
 Zolali, N., v127 (SP320)  
 Zs Molnar, M., v68 (SP146)  
 Zsom, M., v100 (SP241)  
 Zucchi, M., v109 (SP269), v341 (MP423)  
 Zukowska-Szczepowska, E., v175 (SP468),  
 v235 (MP105)  
 Zumurudal, A., v136 (SP348), v297 (MP289),  
 v300 (MP296)  
 Zunino, P., v346 (MP436)  
 Zupan, I.P., v267 (MP199)  
 Zwiech, R., v224 (MP068), v225 (MP071)  
 Zwolinska, D., v96 (SP229), v127 (SP323)  
 Zygmunt, A., v81 (SP186)
